# Supplementary material for: Copy number signatures and CCNE1 amplification reveal the involvement of replication stress in high-grade endometrial tumors oncogenesis
Source: PubMed Central journal article supplement (PMC11322381; doi:10.1007/s13402-024-00942-w), 2024-04-02

# Percentage of Copy Number Segments

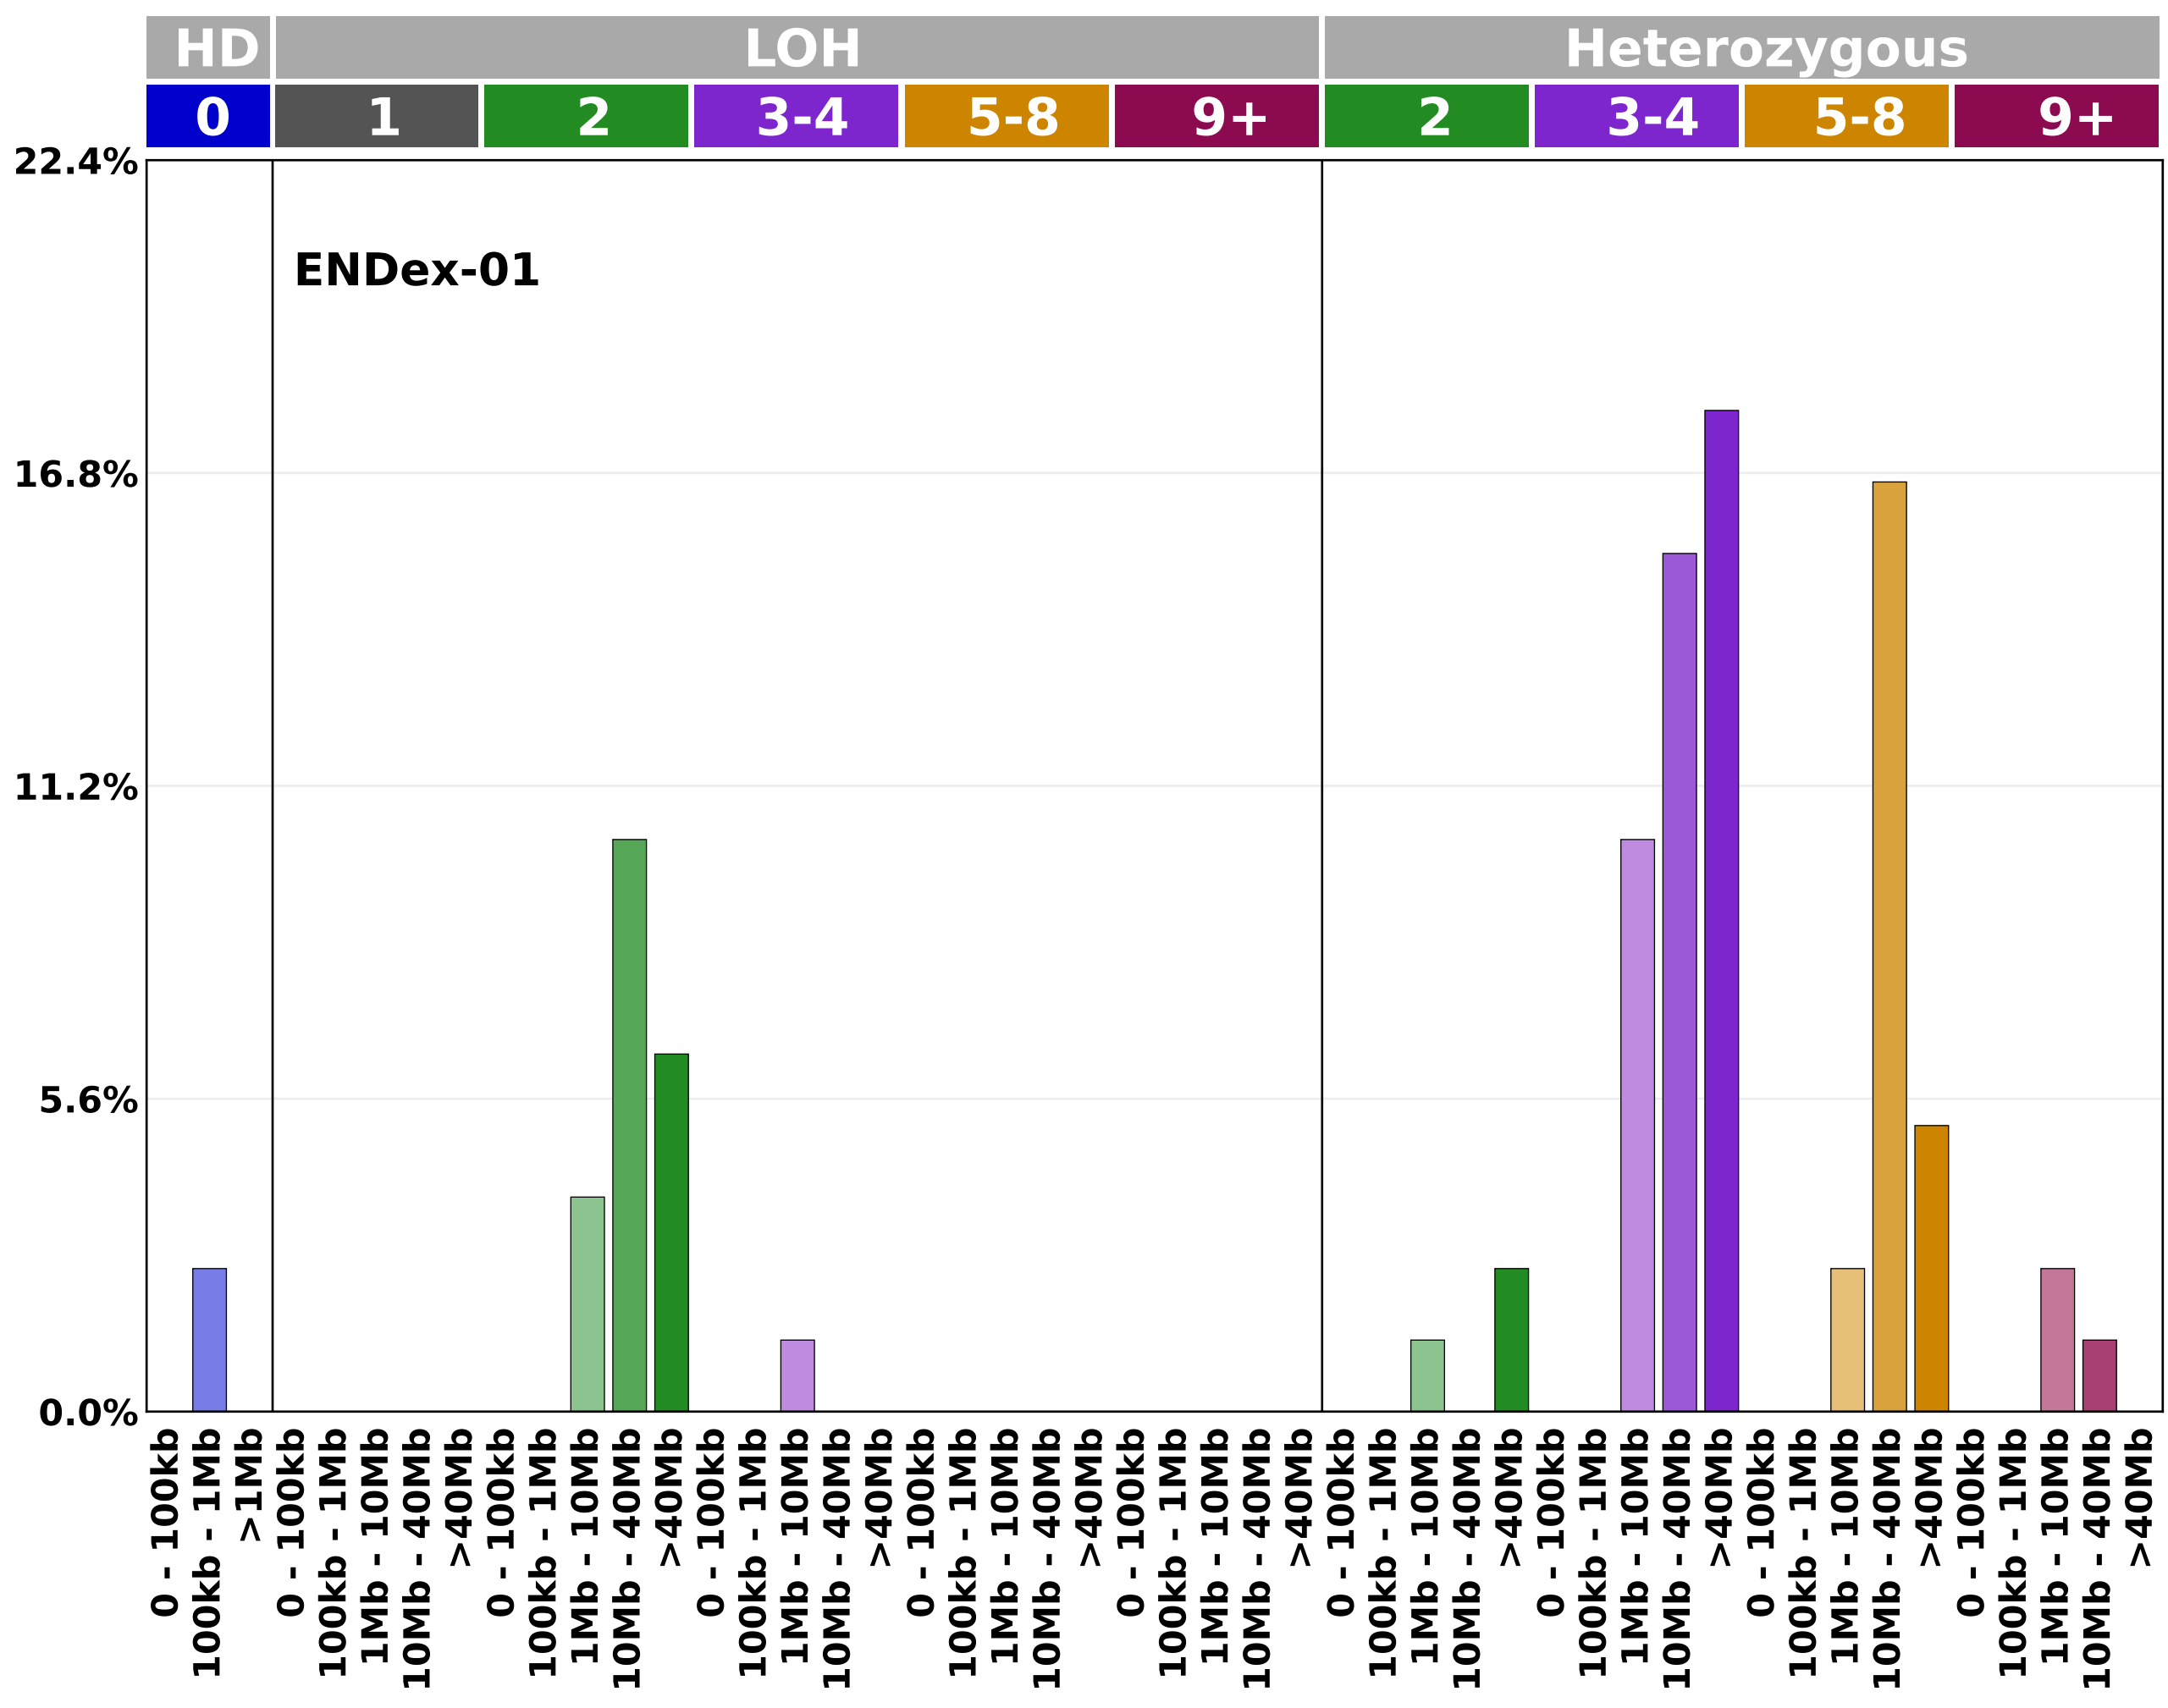

# Percentage of Copy Number Segments

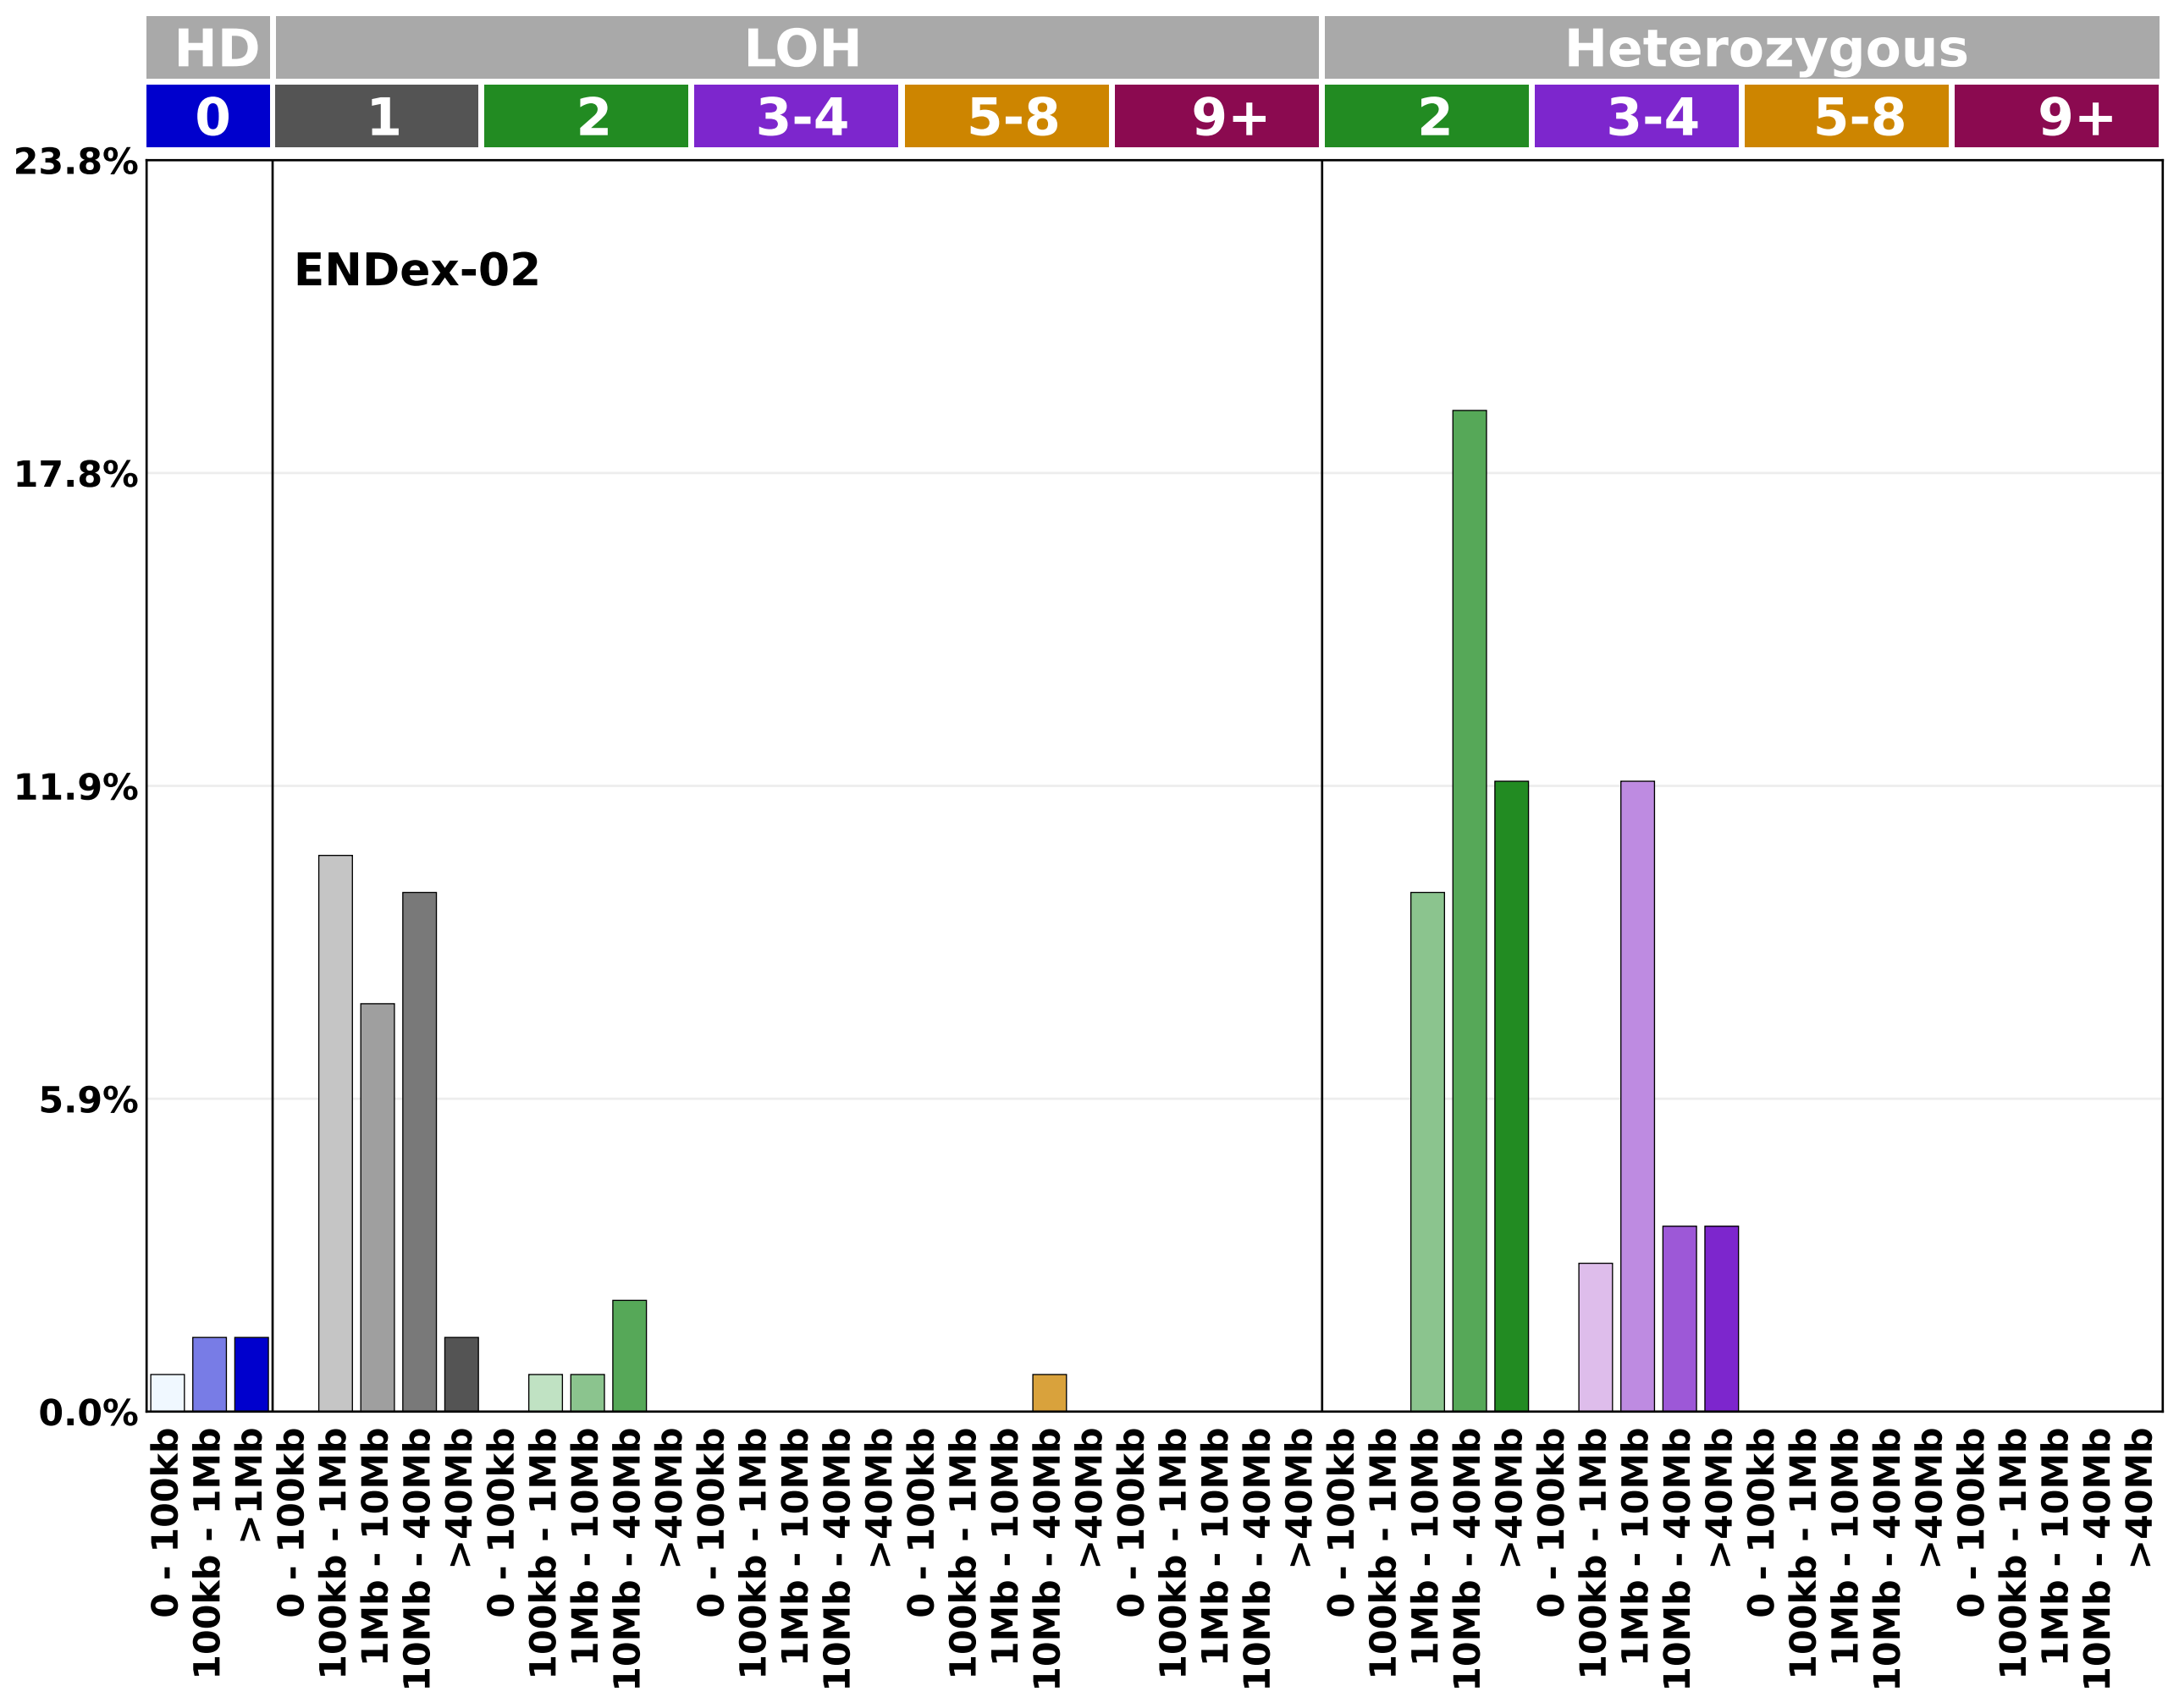

# Percentage of Copy Number Segments

HD LOH Heterozygous

0 1 2 3-4 5-8 9+ 2 3-4 5-8 9+

26.1%  
19.6%  
13.1%  
6.5%  
0.0%

**ENDex-04**

0 - 100kb  
100kb - 1Mb  
>1Mb  
0 - 100kb  
100kb - 1Mb  
1Mb - 10Mb  
10Mb - 40Mb  
>40Mb  
0 - 100kb  
100kb - 1Mb  
1Mb - 10Mb  
10Mb - 40Mb  
>40Mb  
0 - 100kb  
100kb - 1Mb  
1Mb - 10Mb  
10Mb - 40Mb  
>40Mb  
0 - 100kb  
100kb - 1Mb  
1Mb - 10Mb  
10Mb - 40Mb  
>40Mb  
0 - 100kb  
100kb - 1Mb  
1Mb - 10Mb  
10Mb - 40Mb  
>40Mb  
0 - 100kb  
100kb - 1Mb  
1Mb - 10Mb  
10Mb - 40Mb  
>40Mb  
0 - 100kb  
100kb - 1Mb  
1Mb - 10Mb  
10Mb - 40Mb  
>40Mb  
0 - 100kb  
100kb - 1Mb  
1Mb - 10Mb  
10Mb - 40Mb  
>40Mb

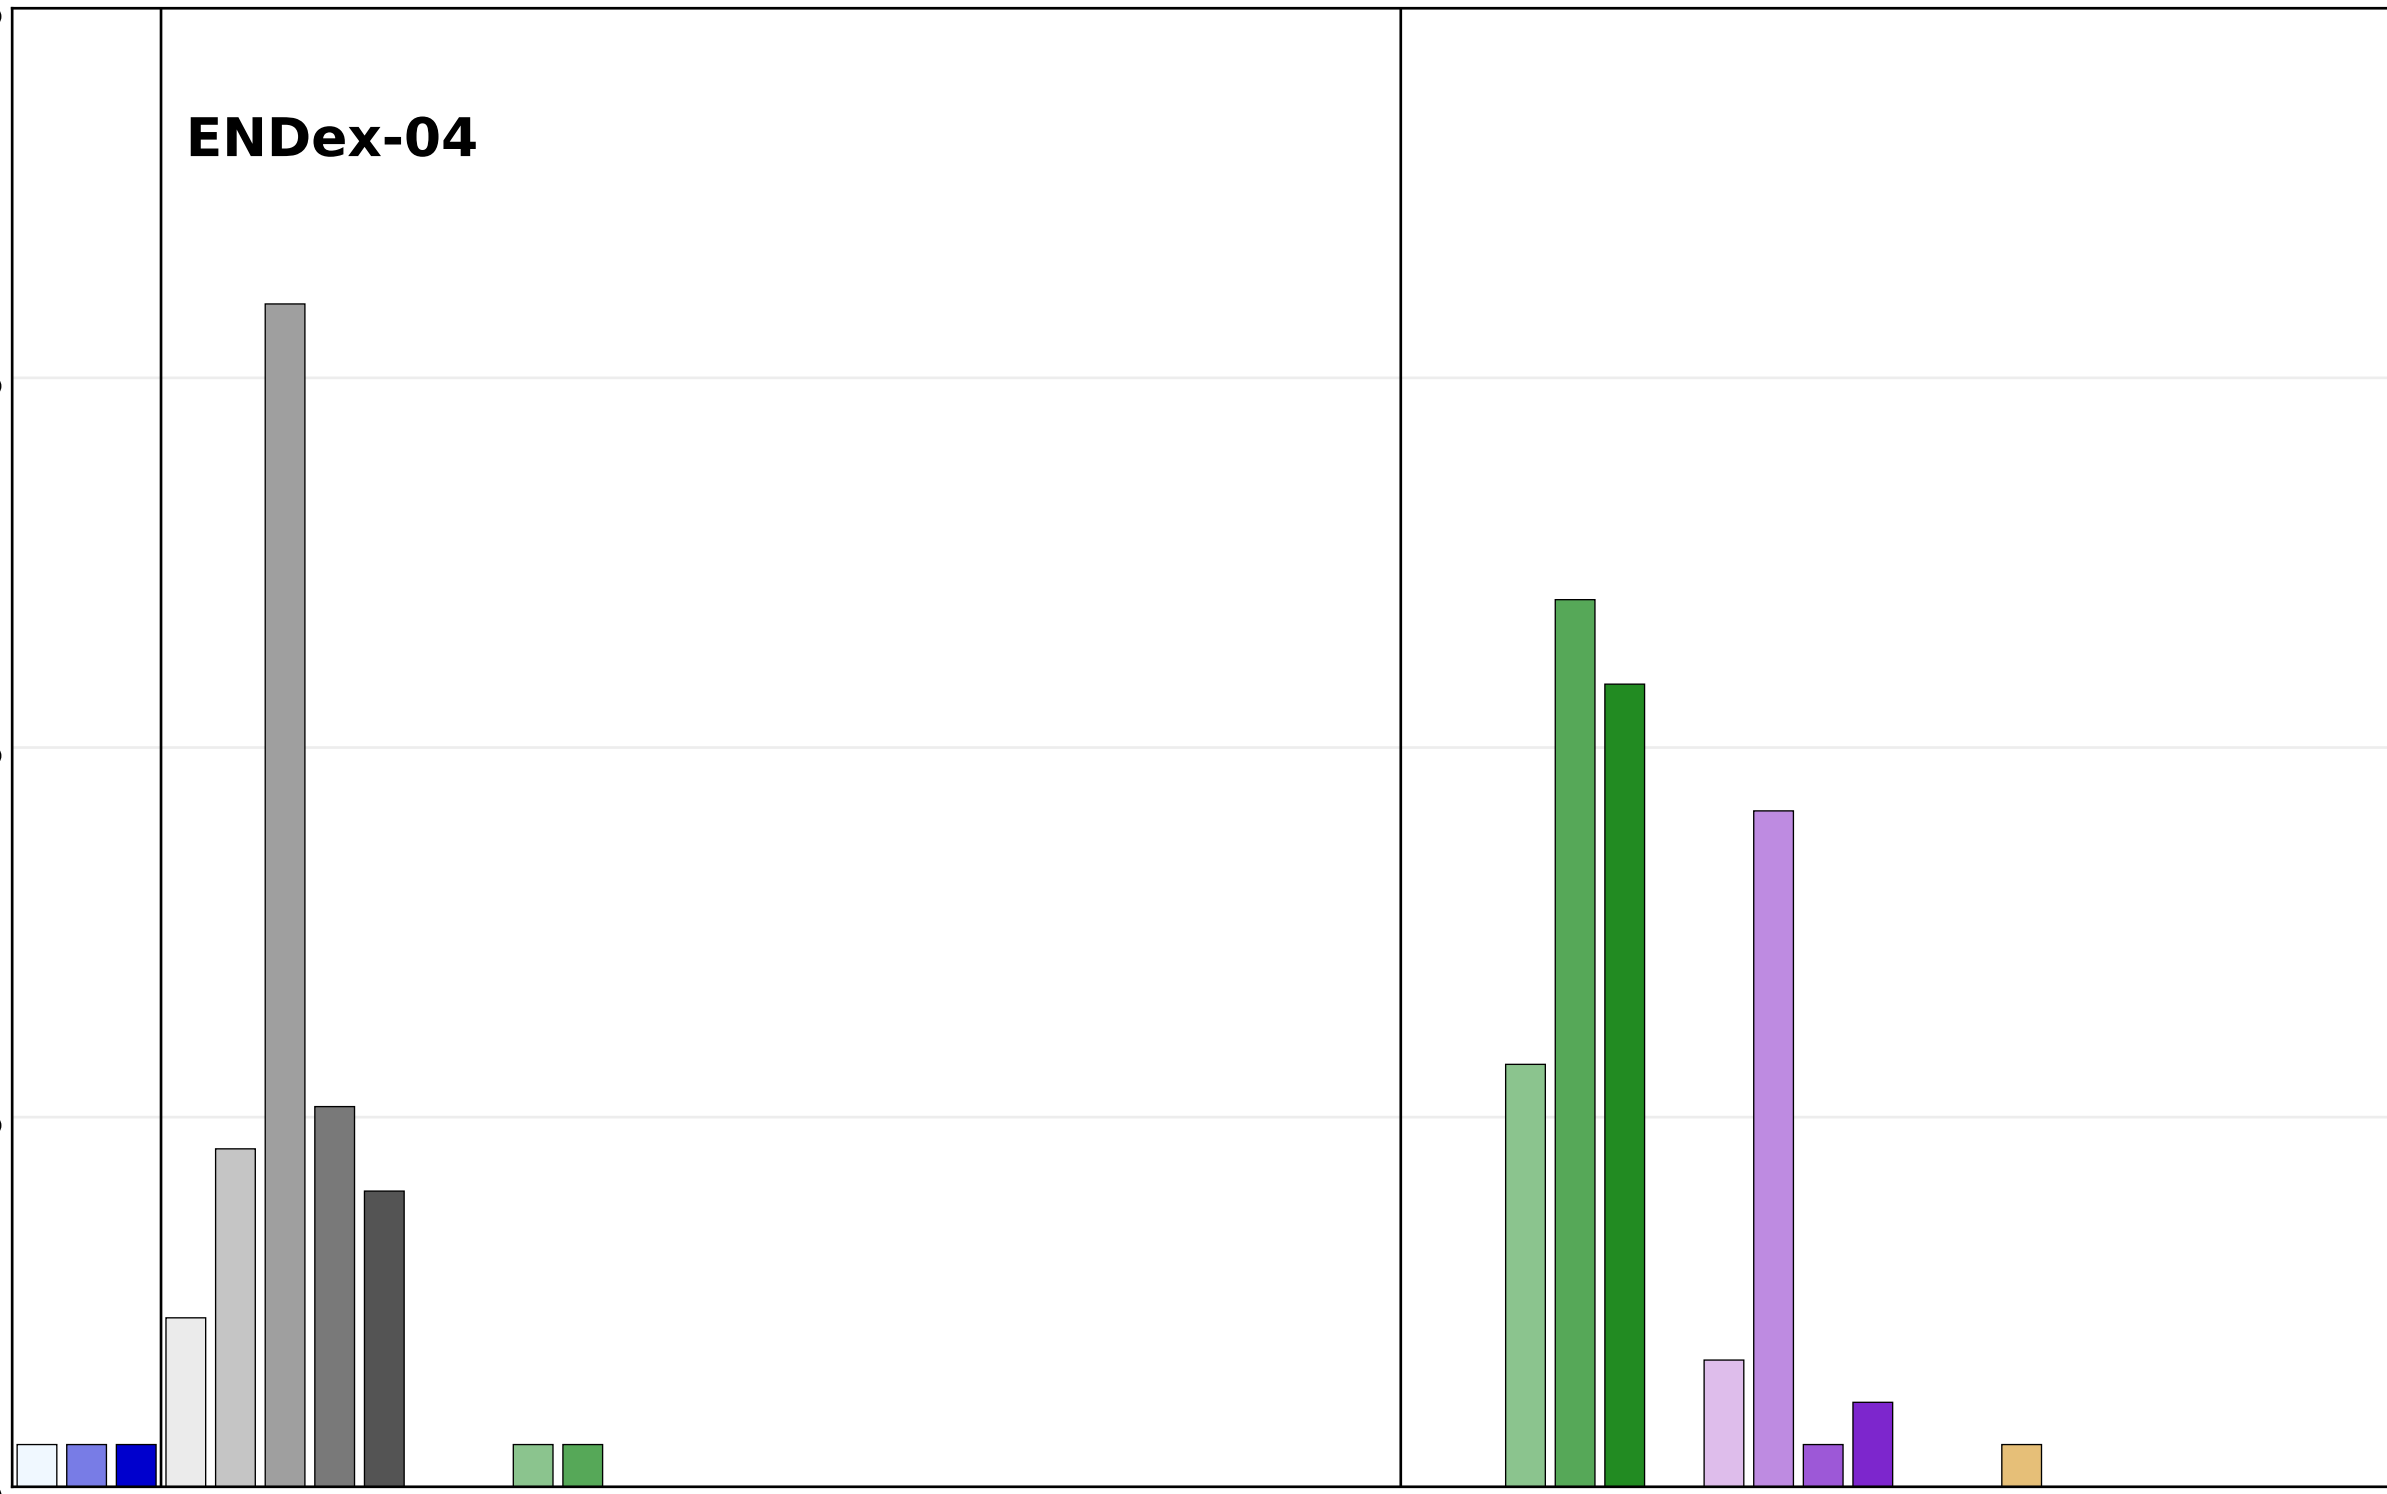



# Percentage of Copy Number Segments

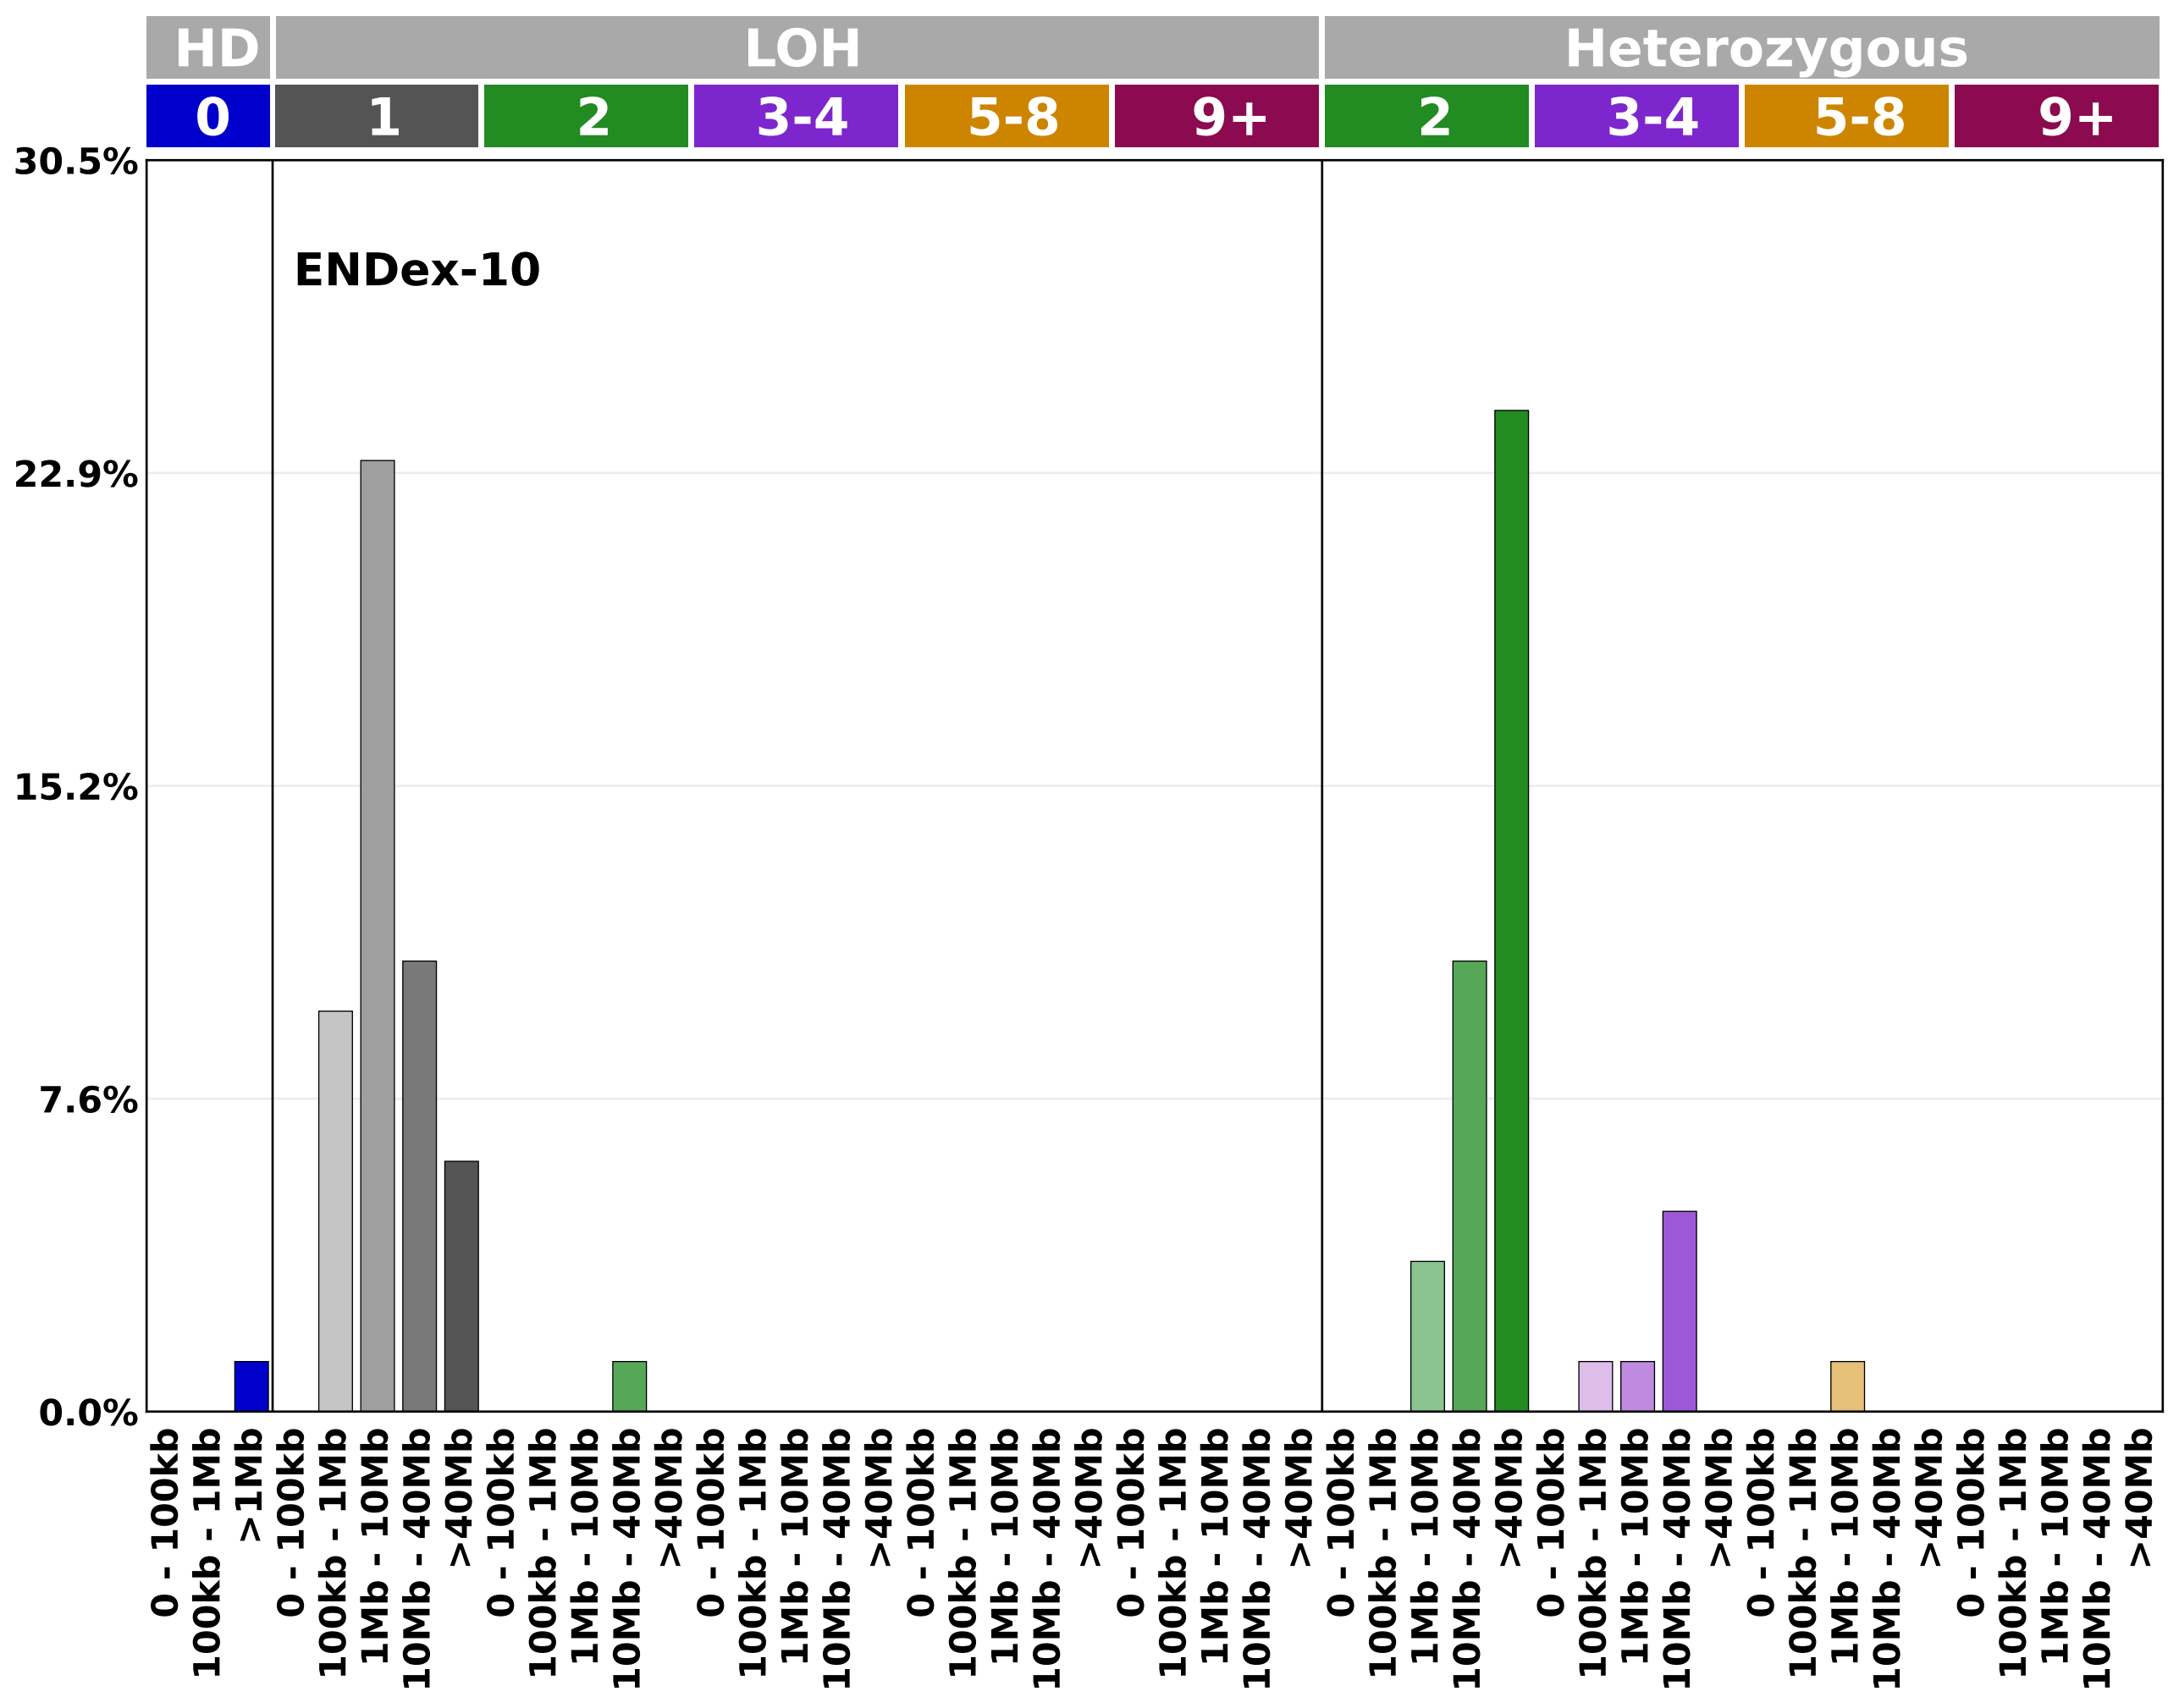

# Percentage of Copy Number Segments

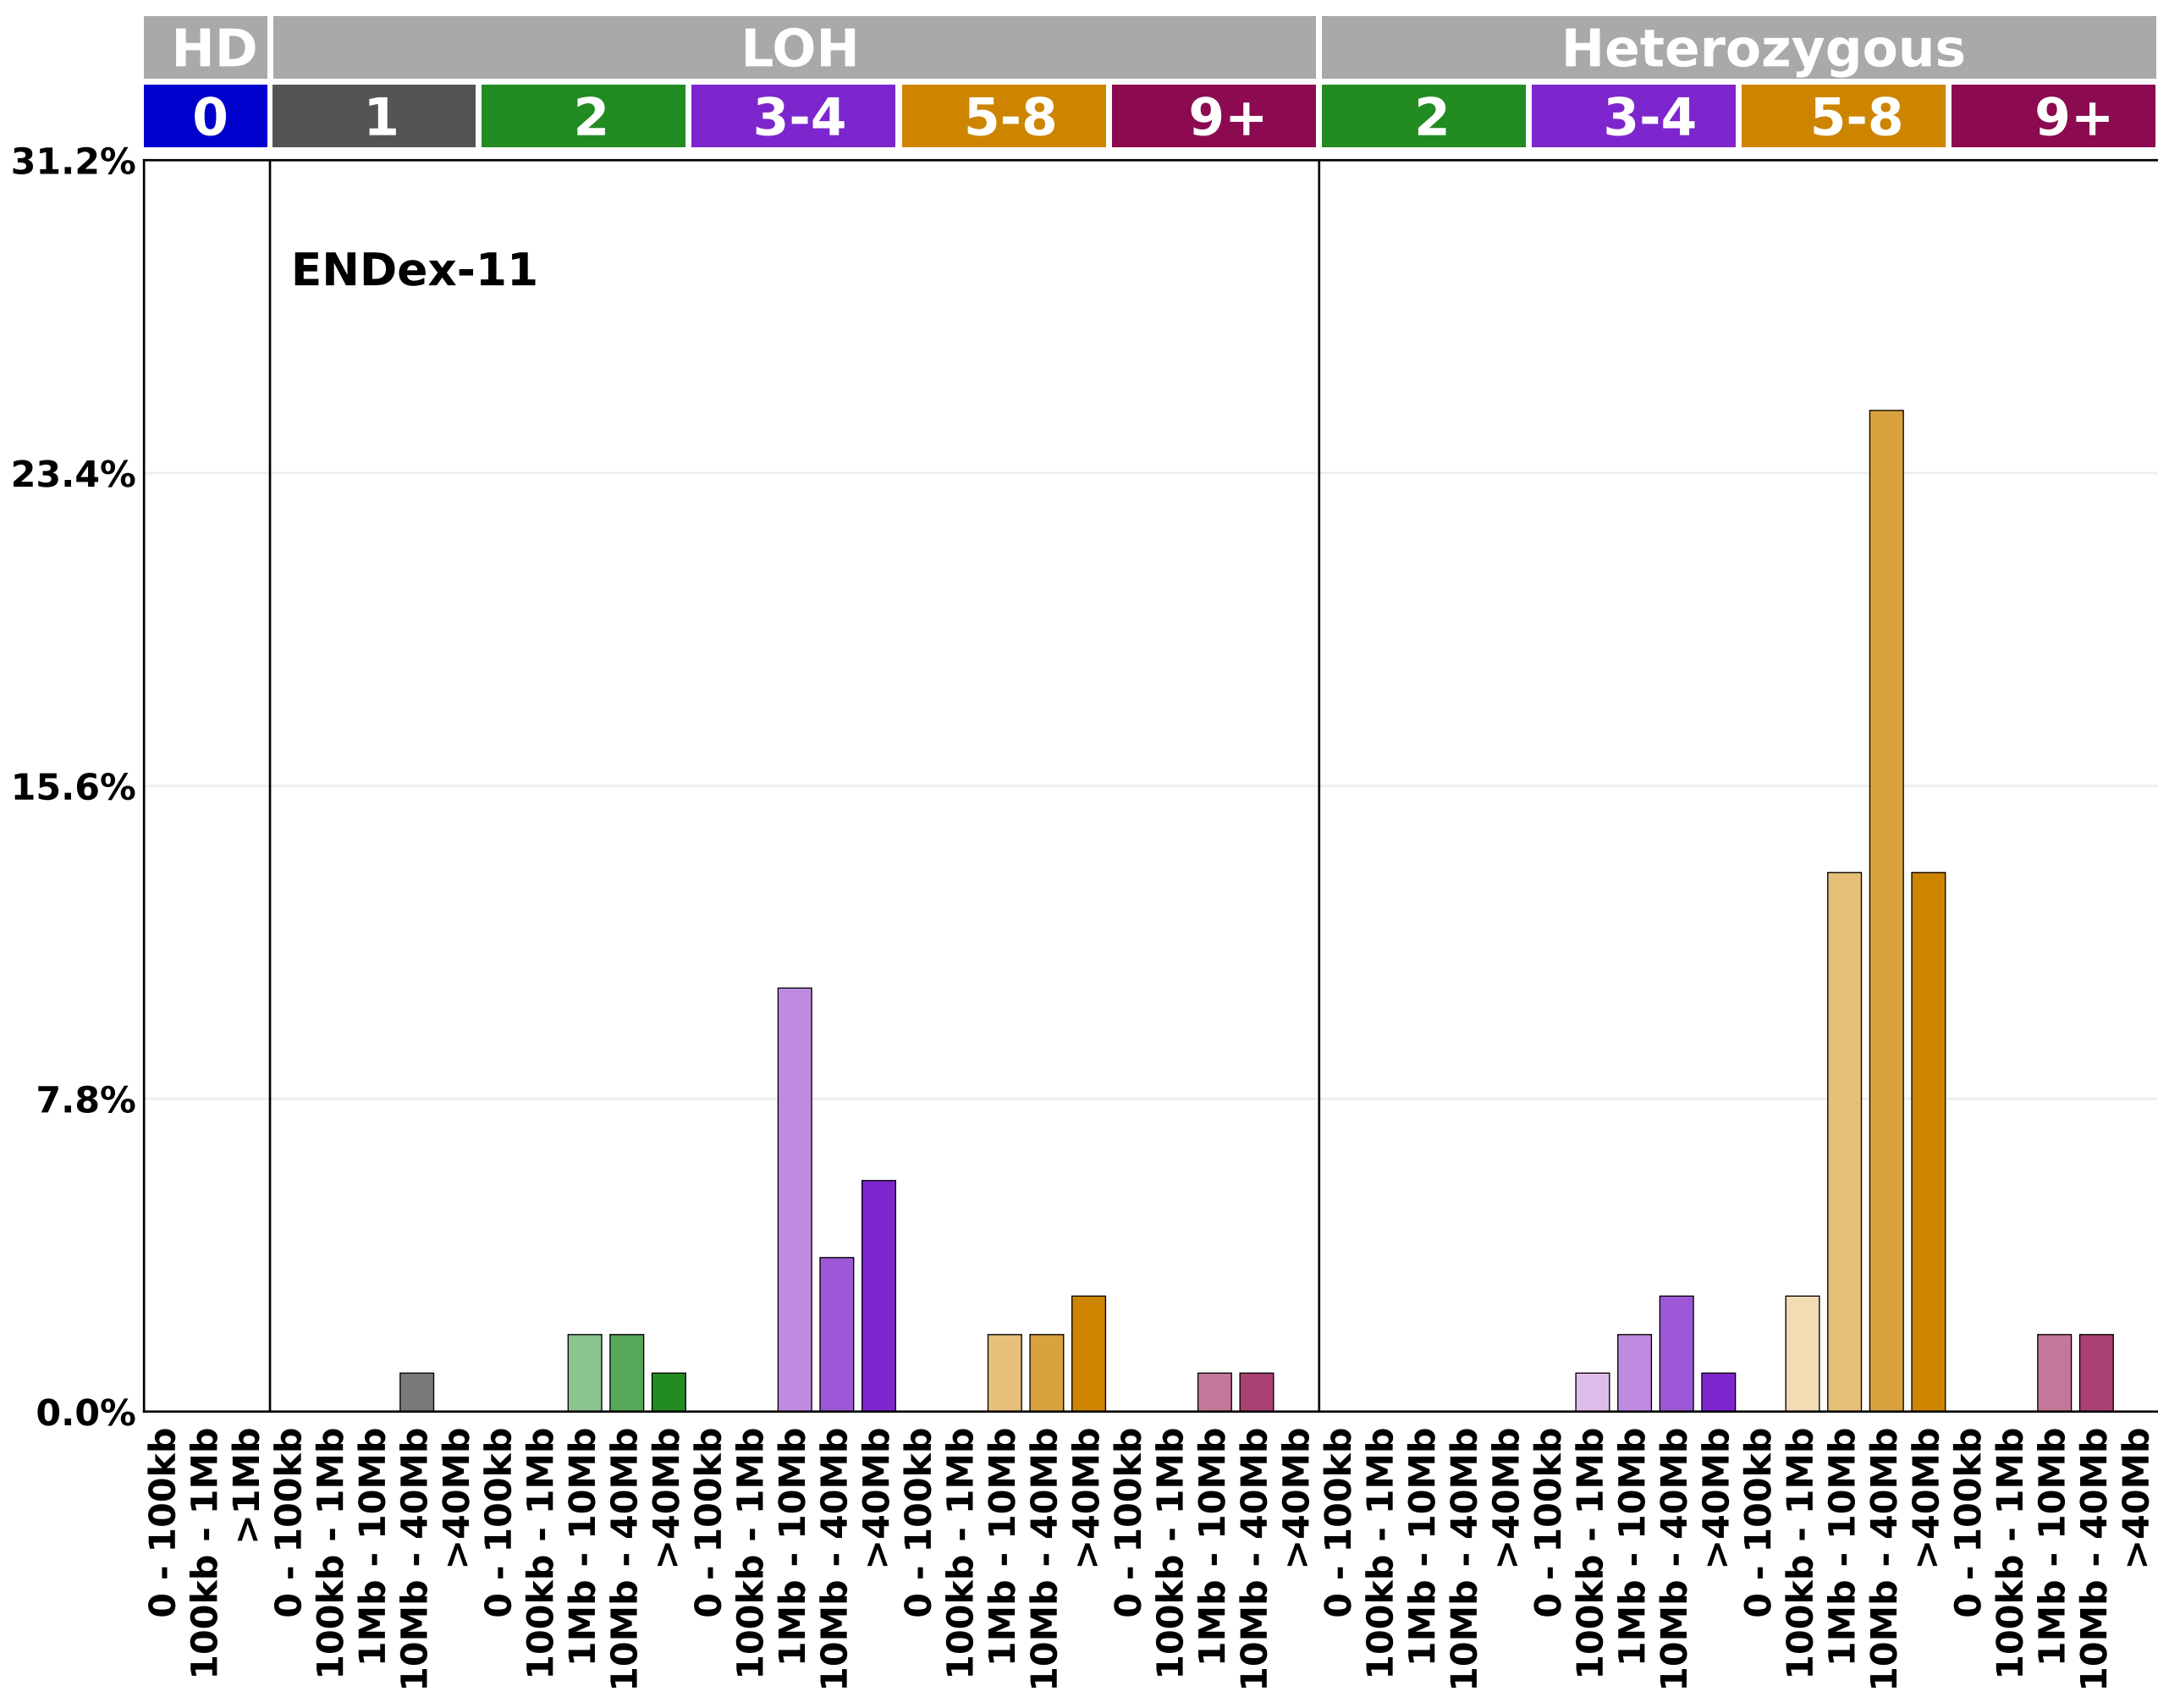

# Percentage of Copy Number Segments

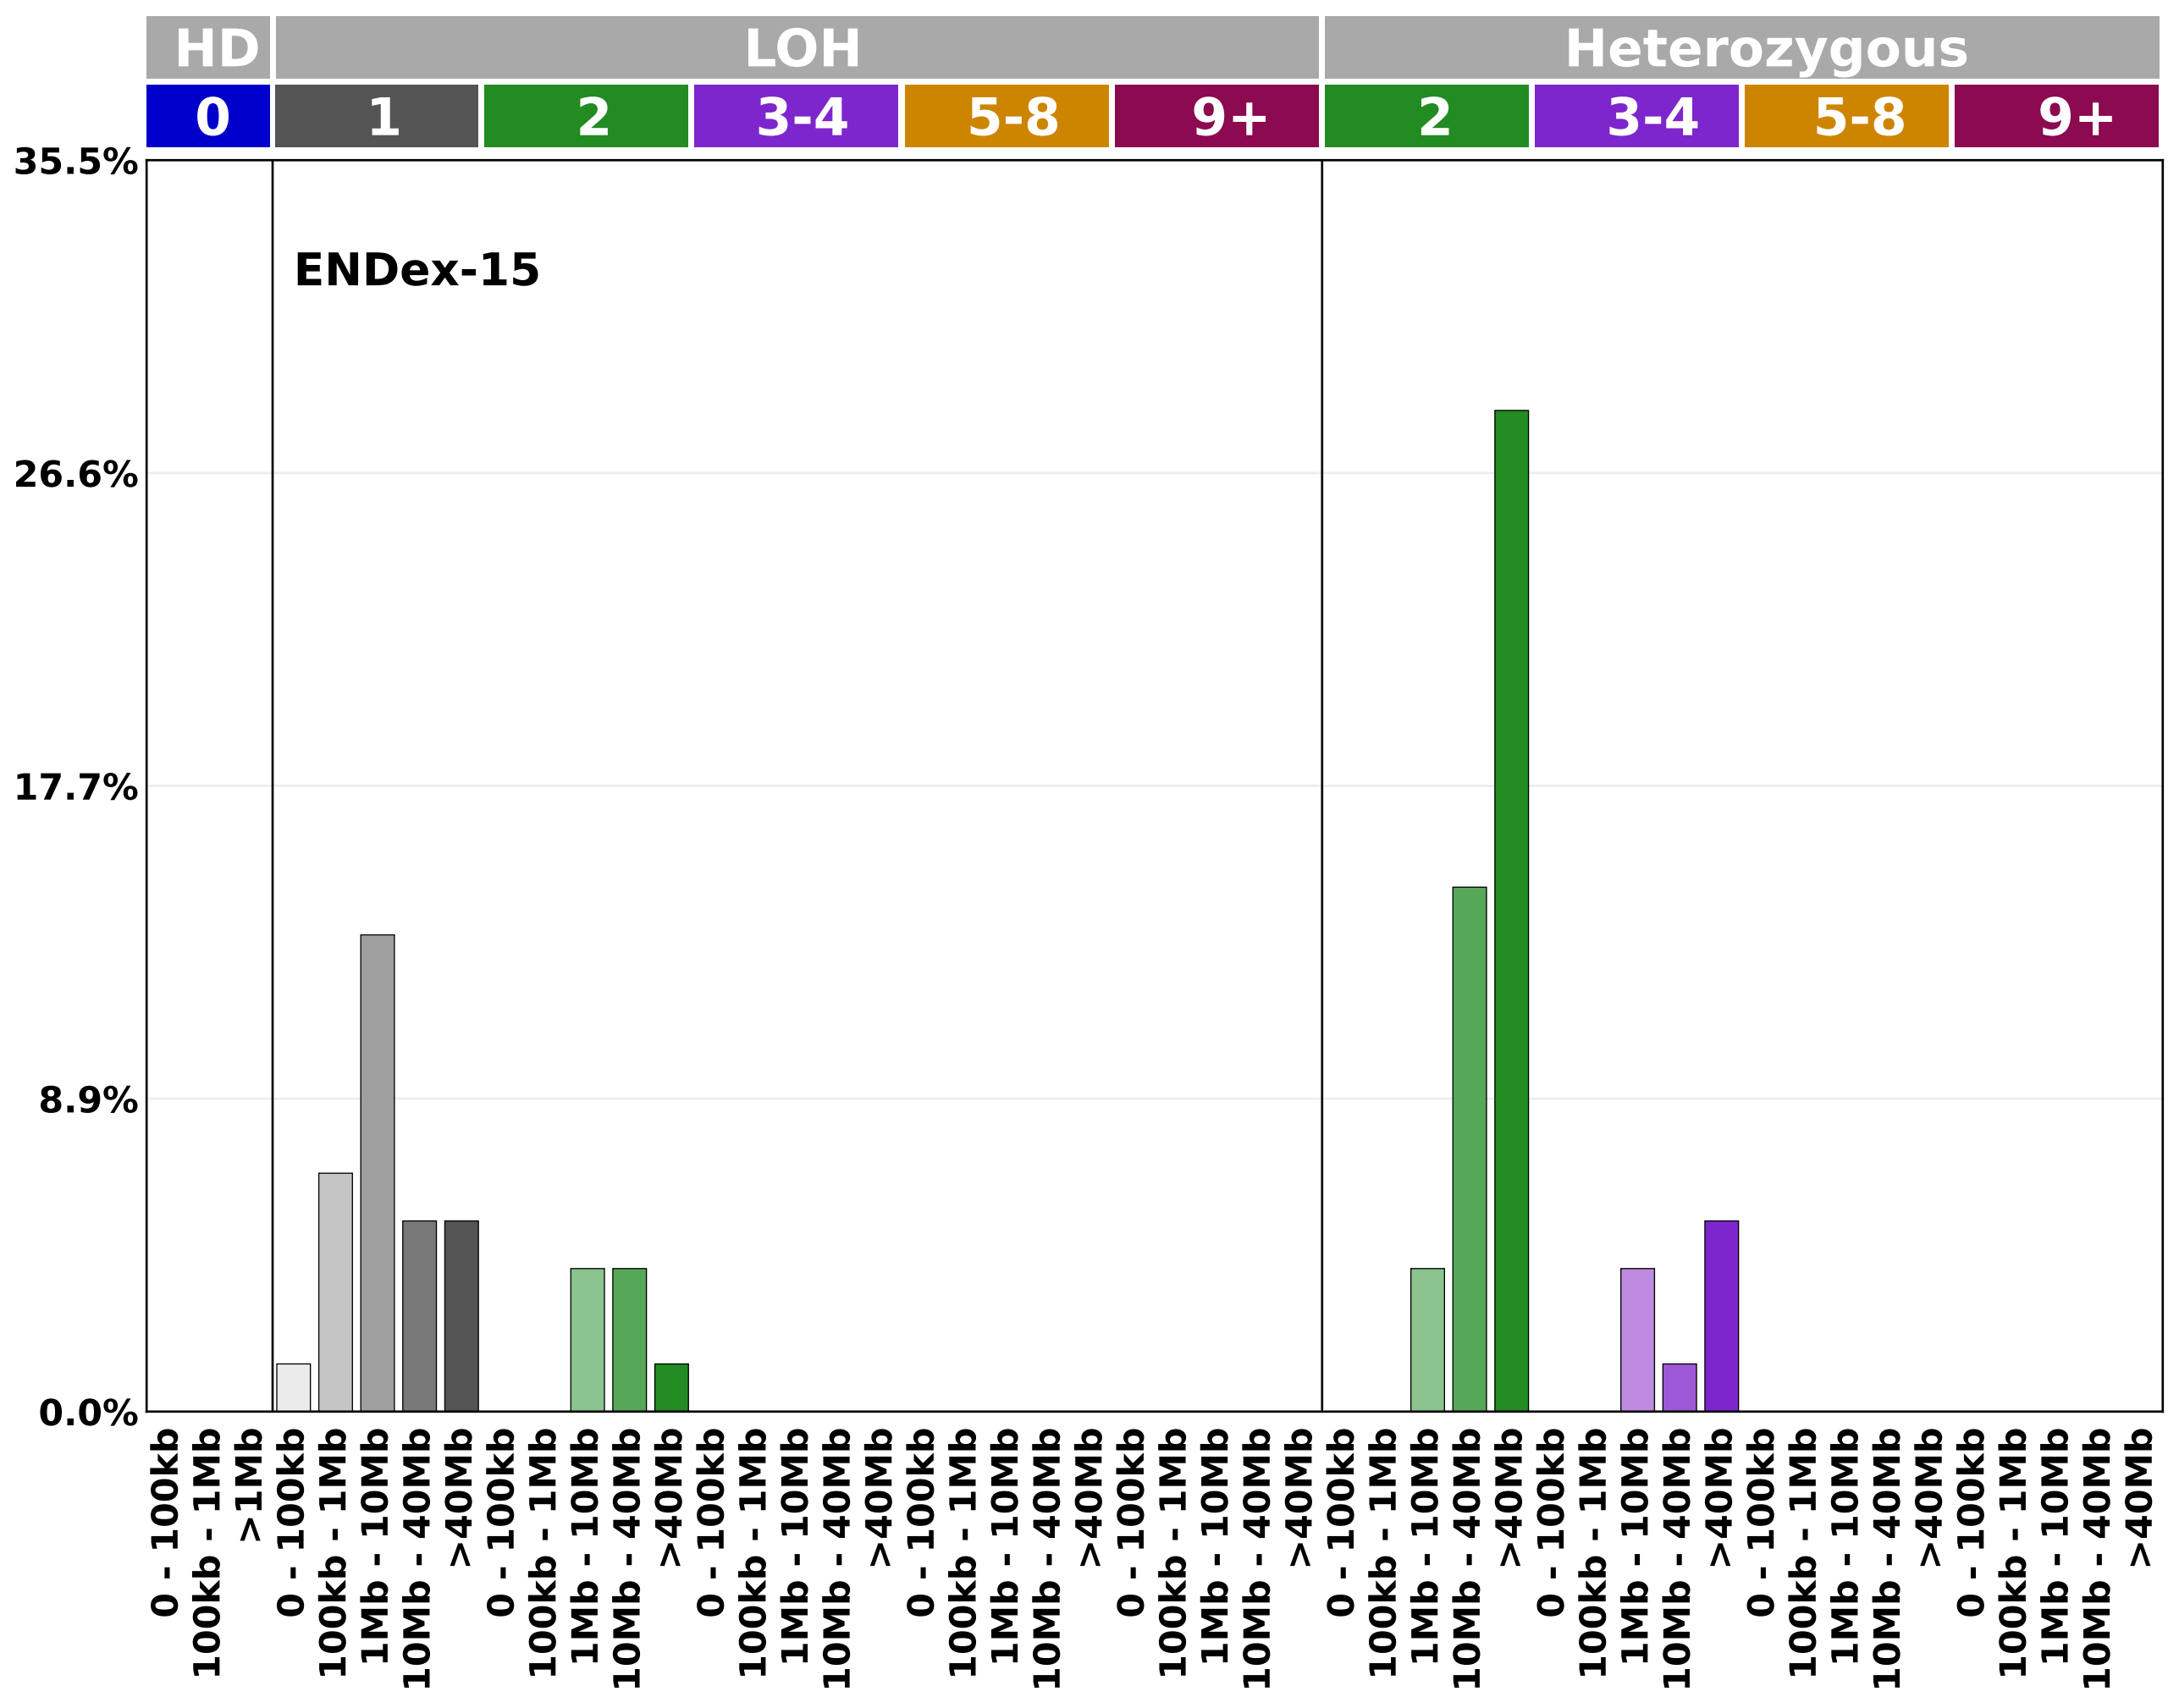





# Percentage of Copy Number Segments

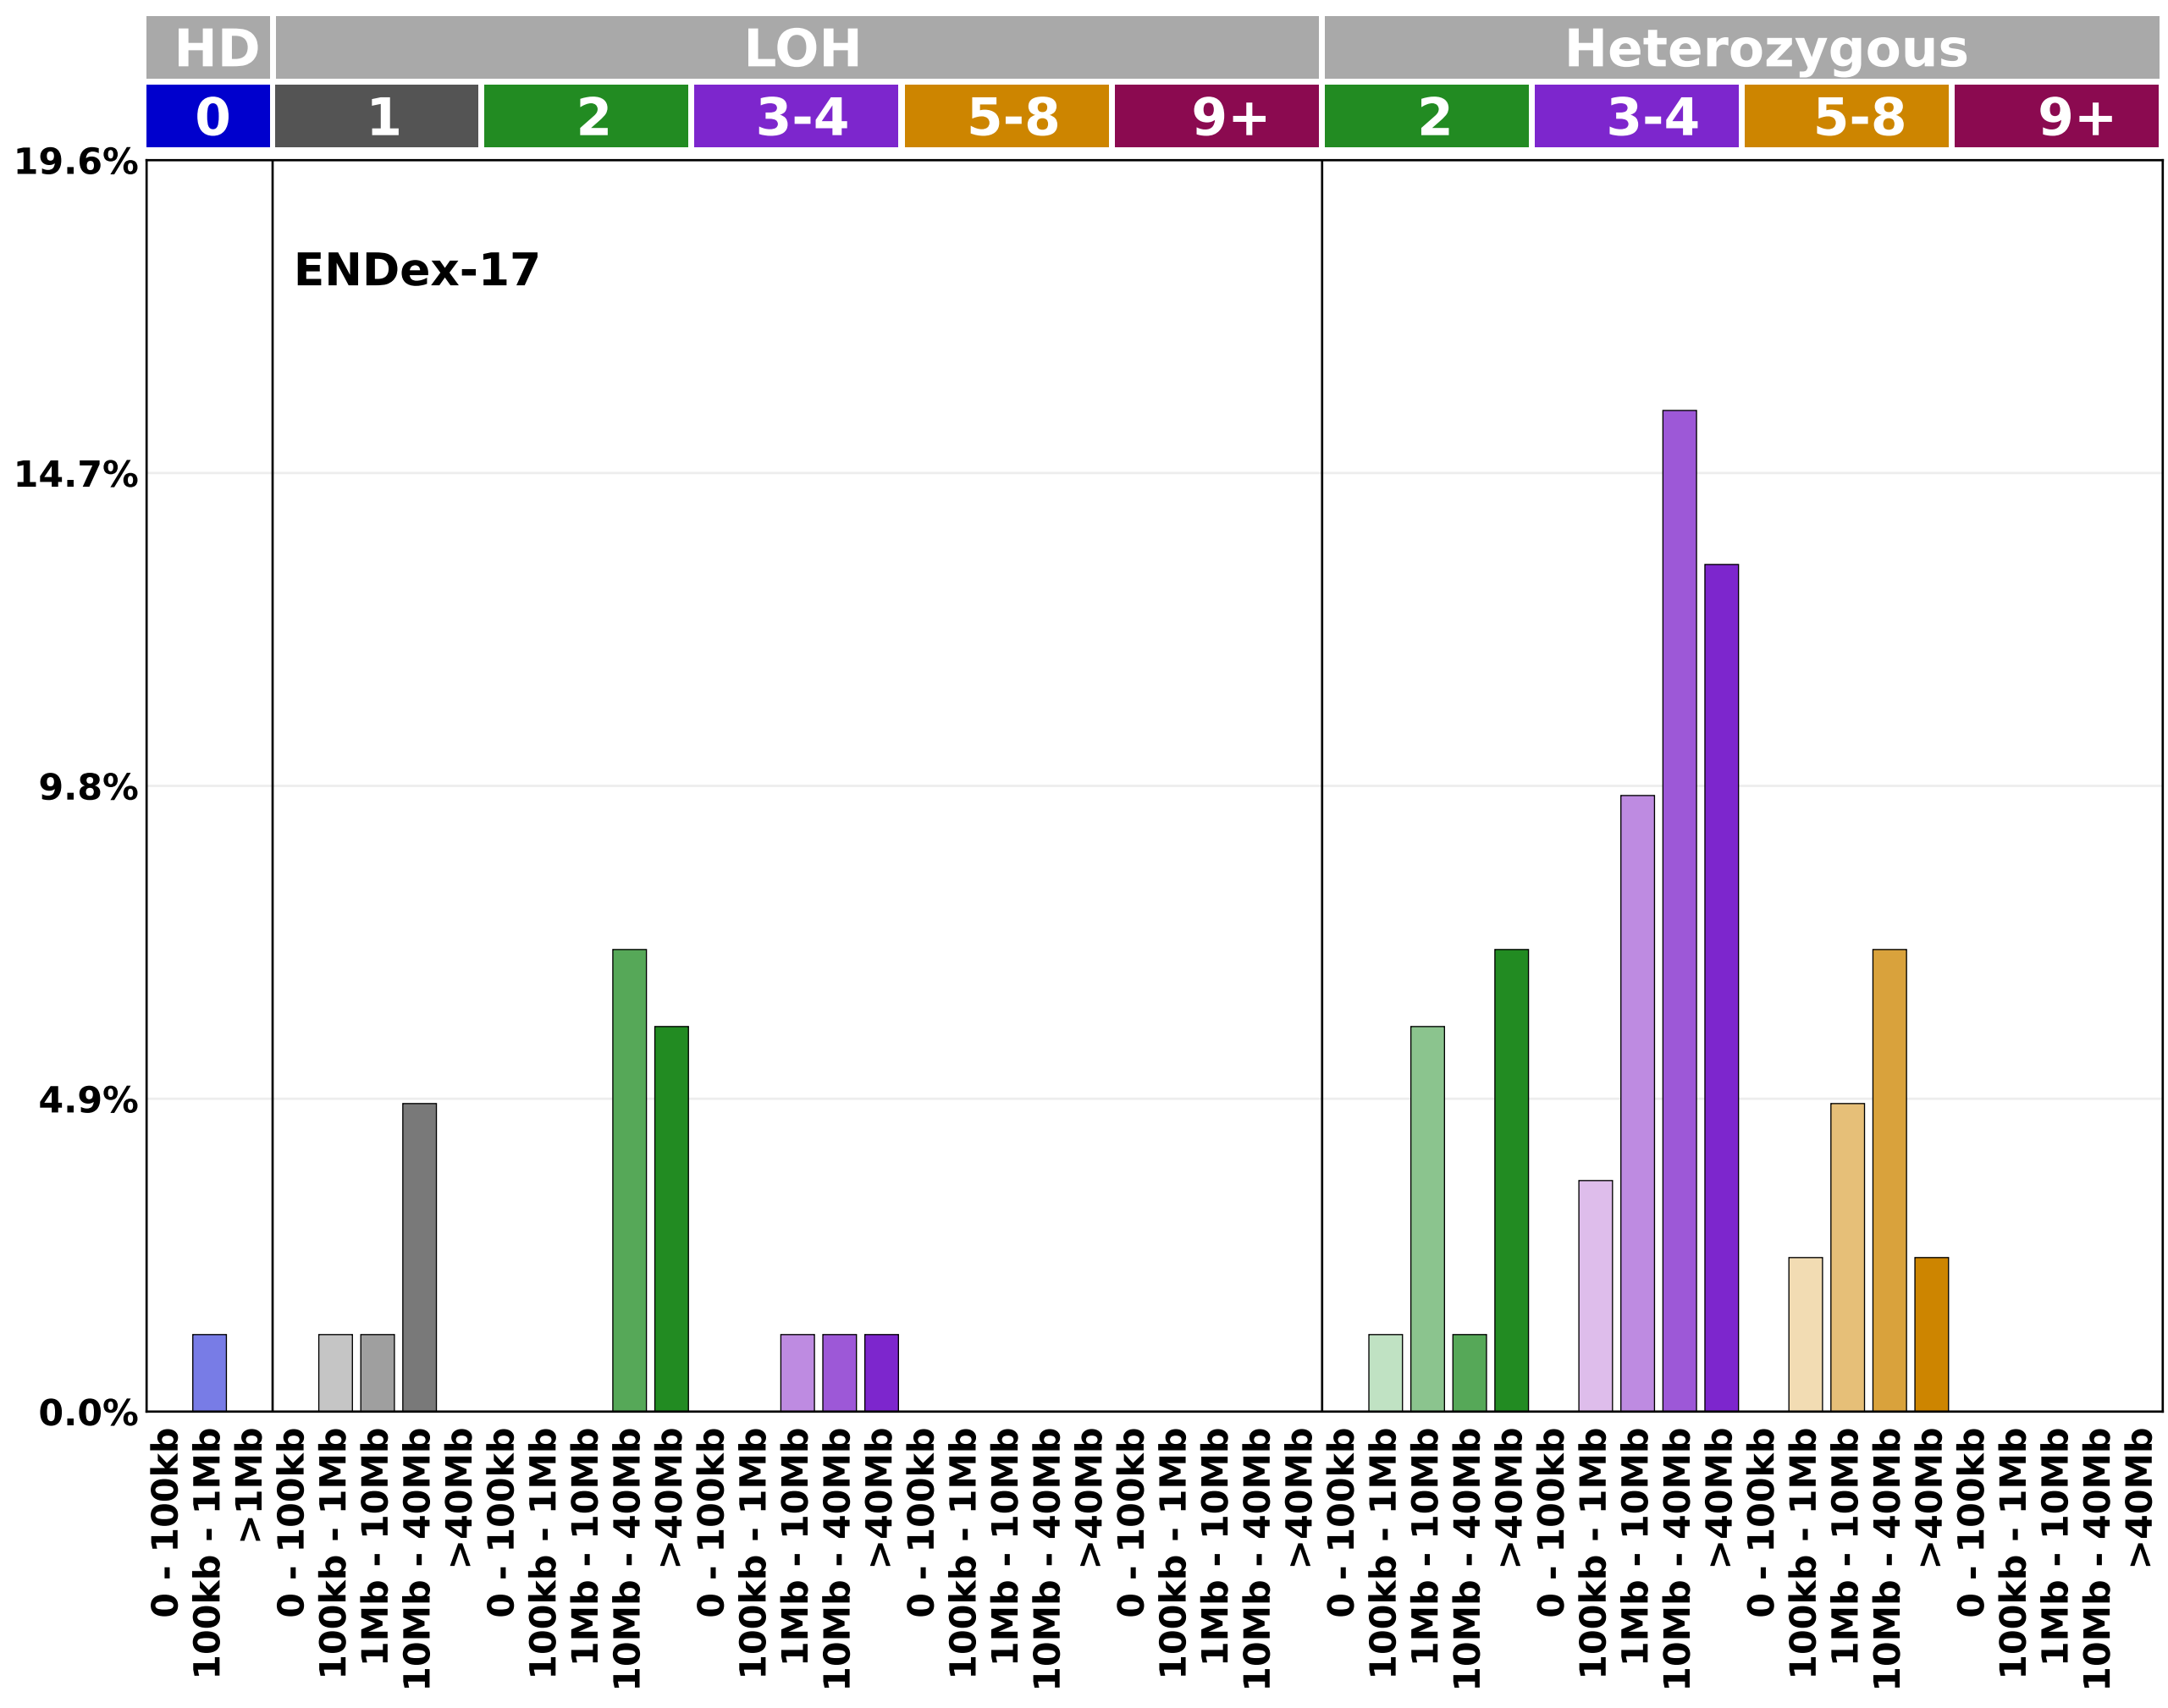

# Percentage of Copy Number Segments

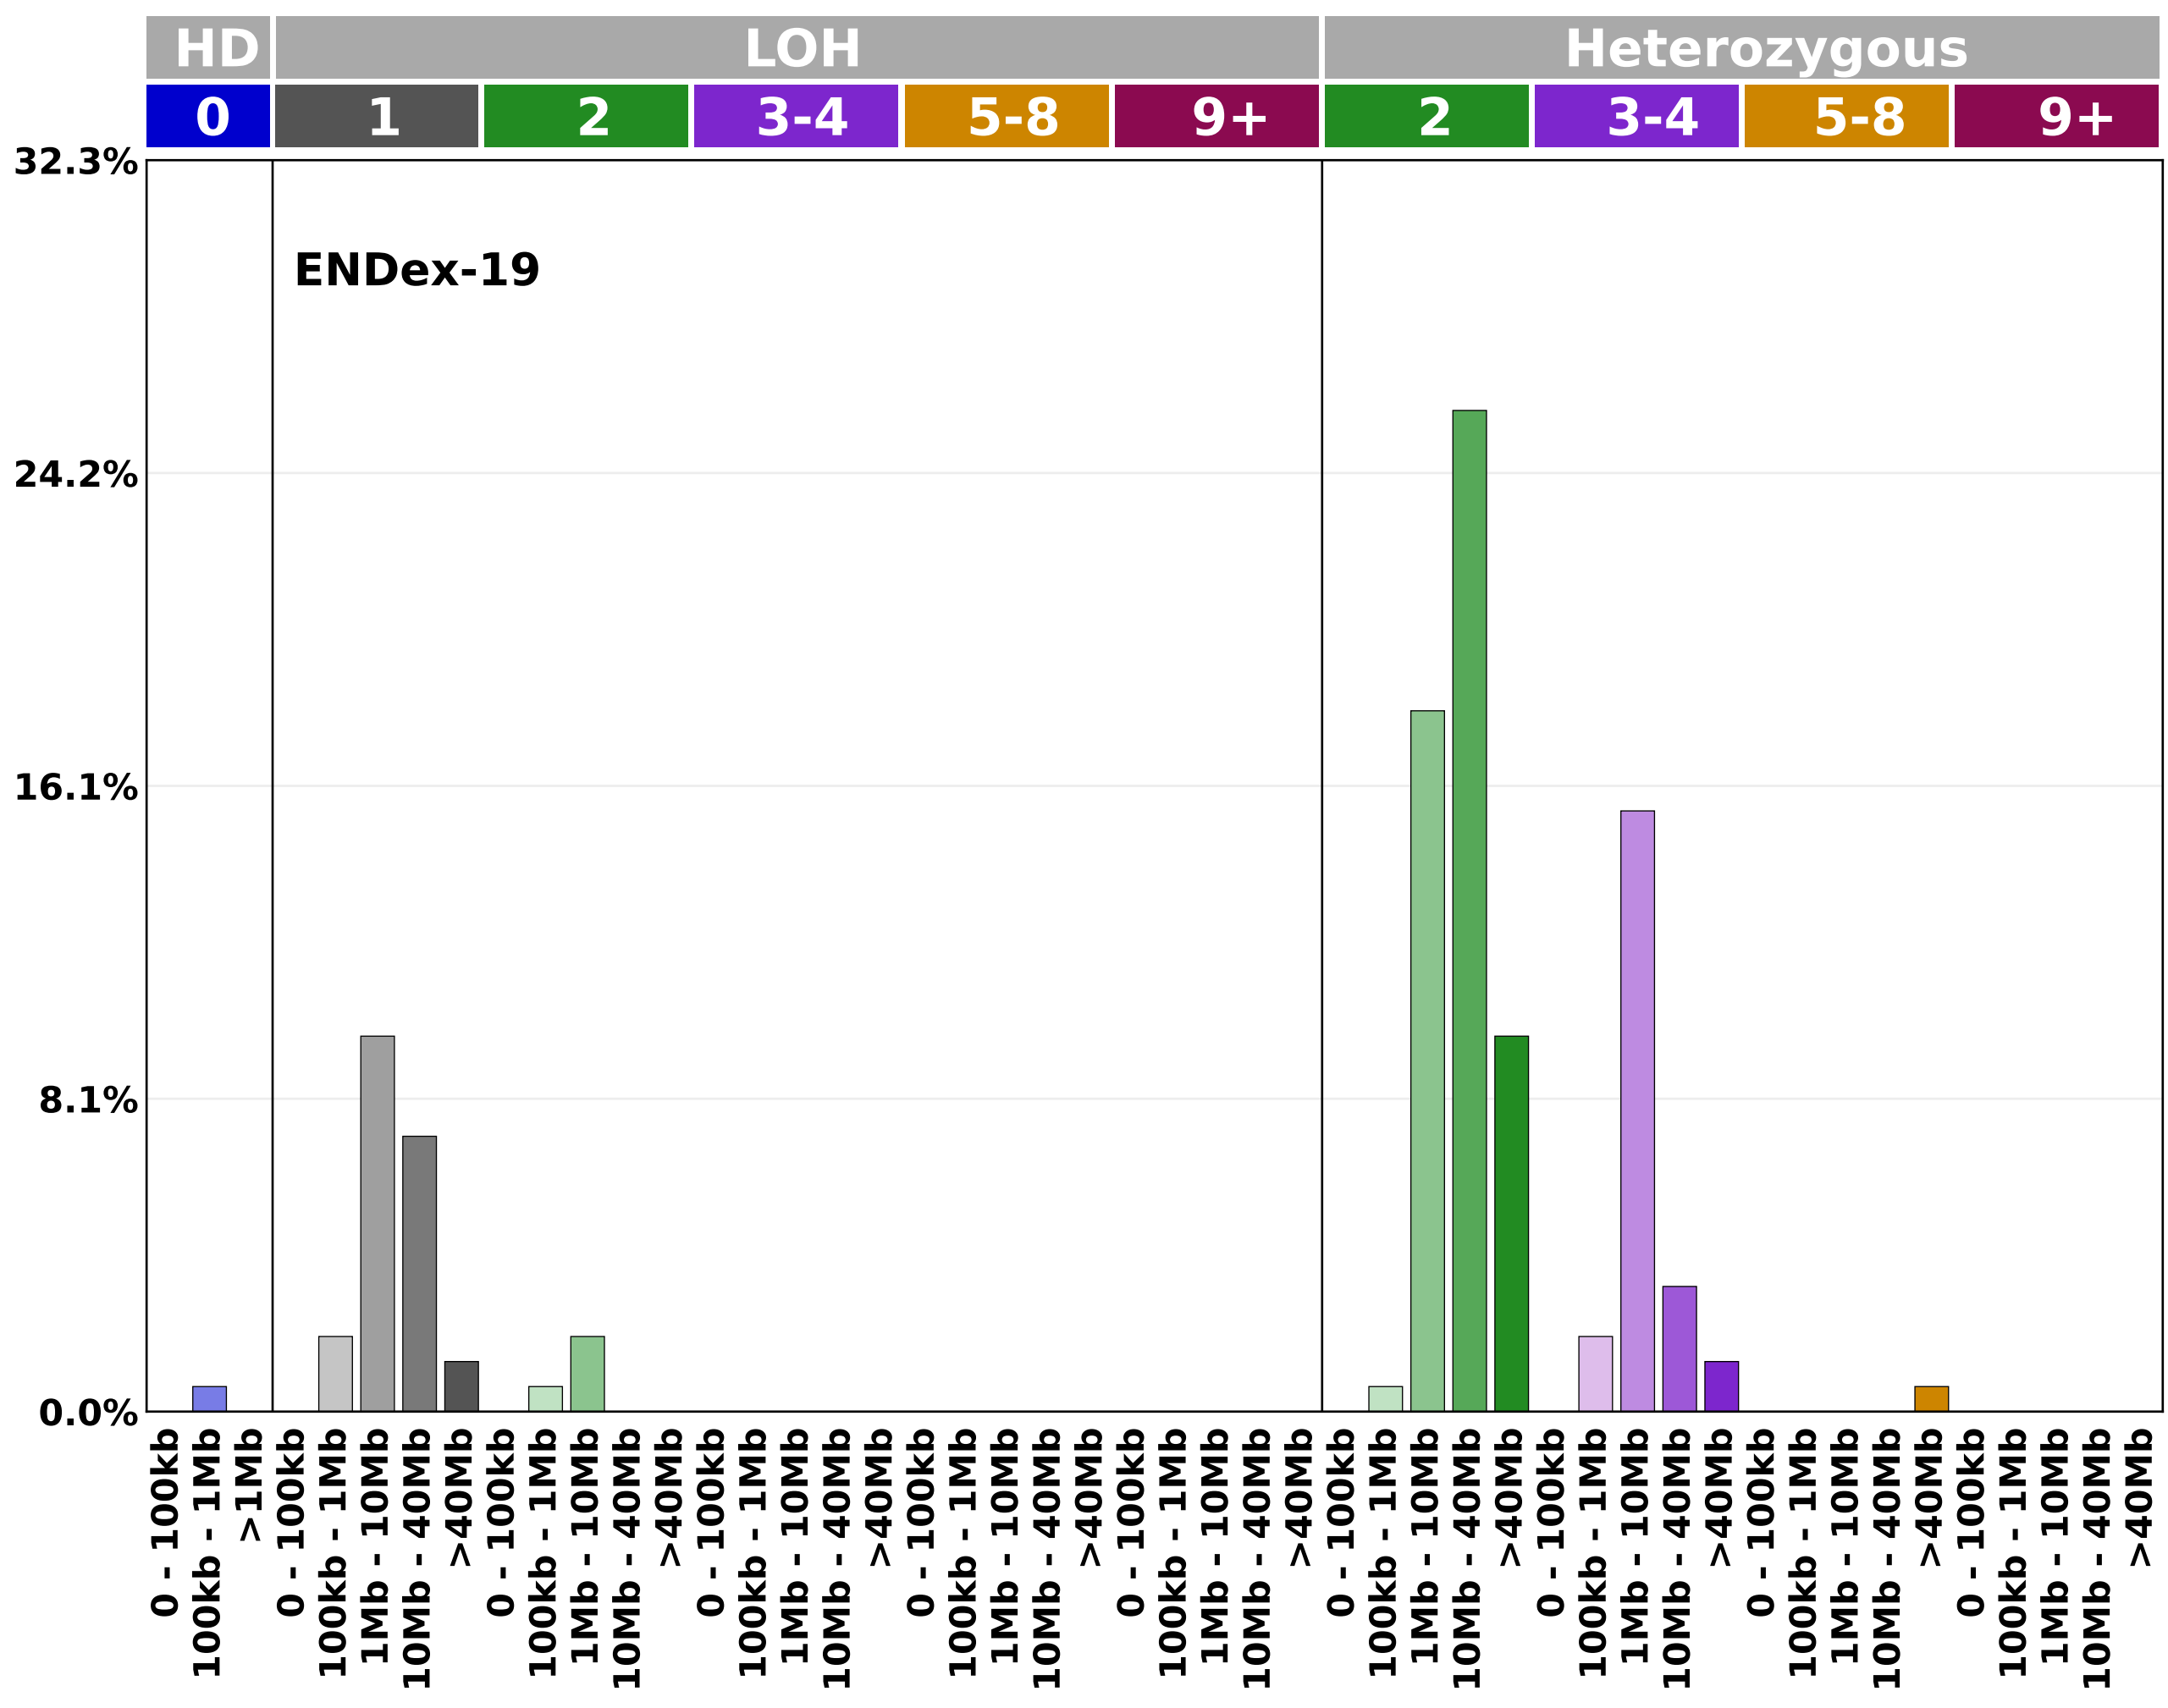

# Percentage of Copy Number Segments

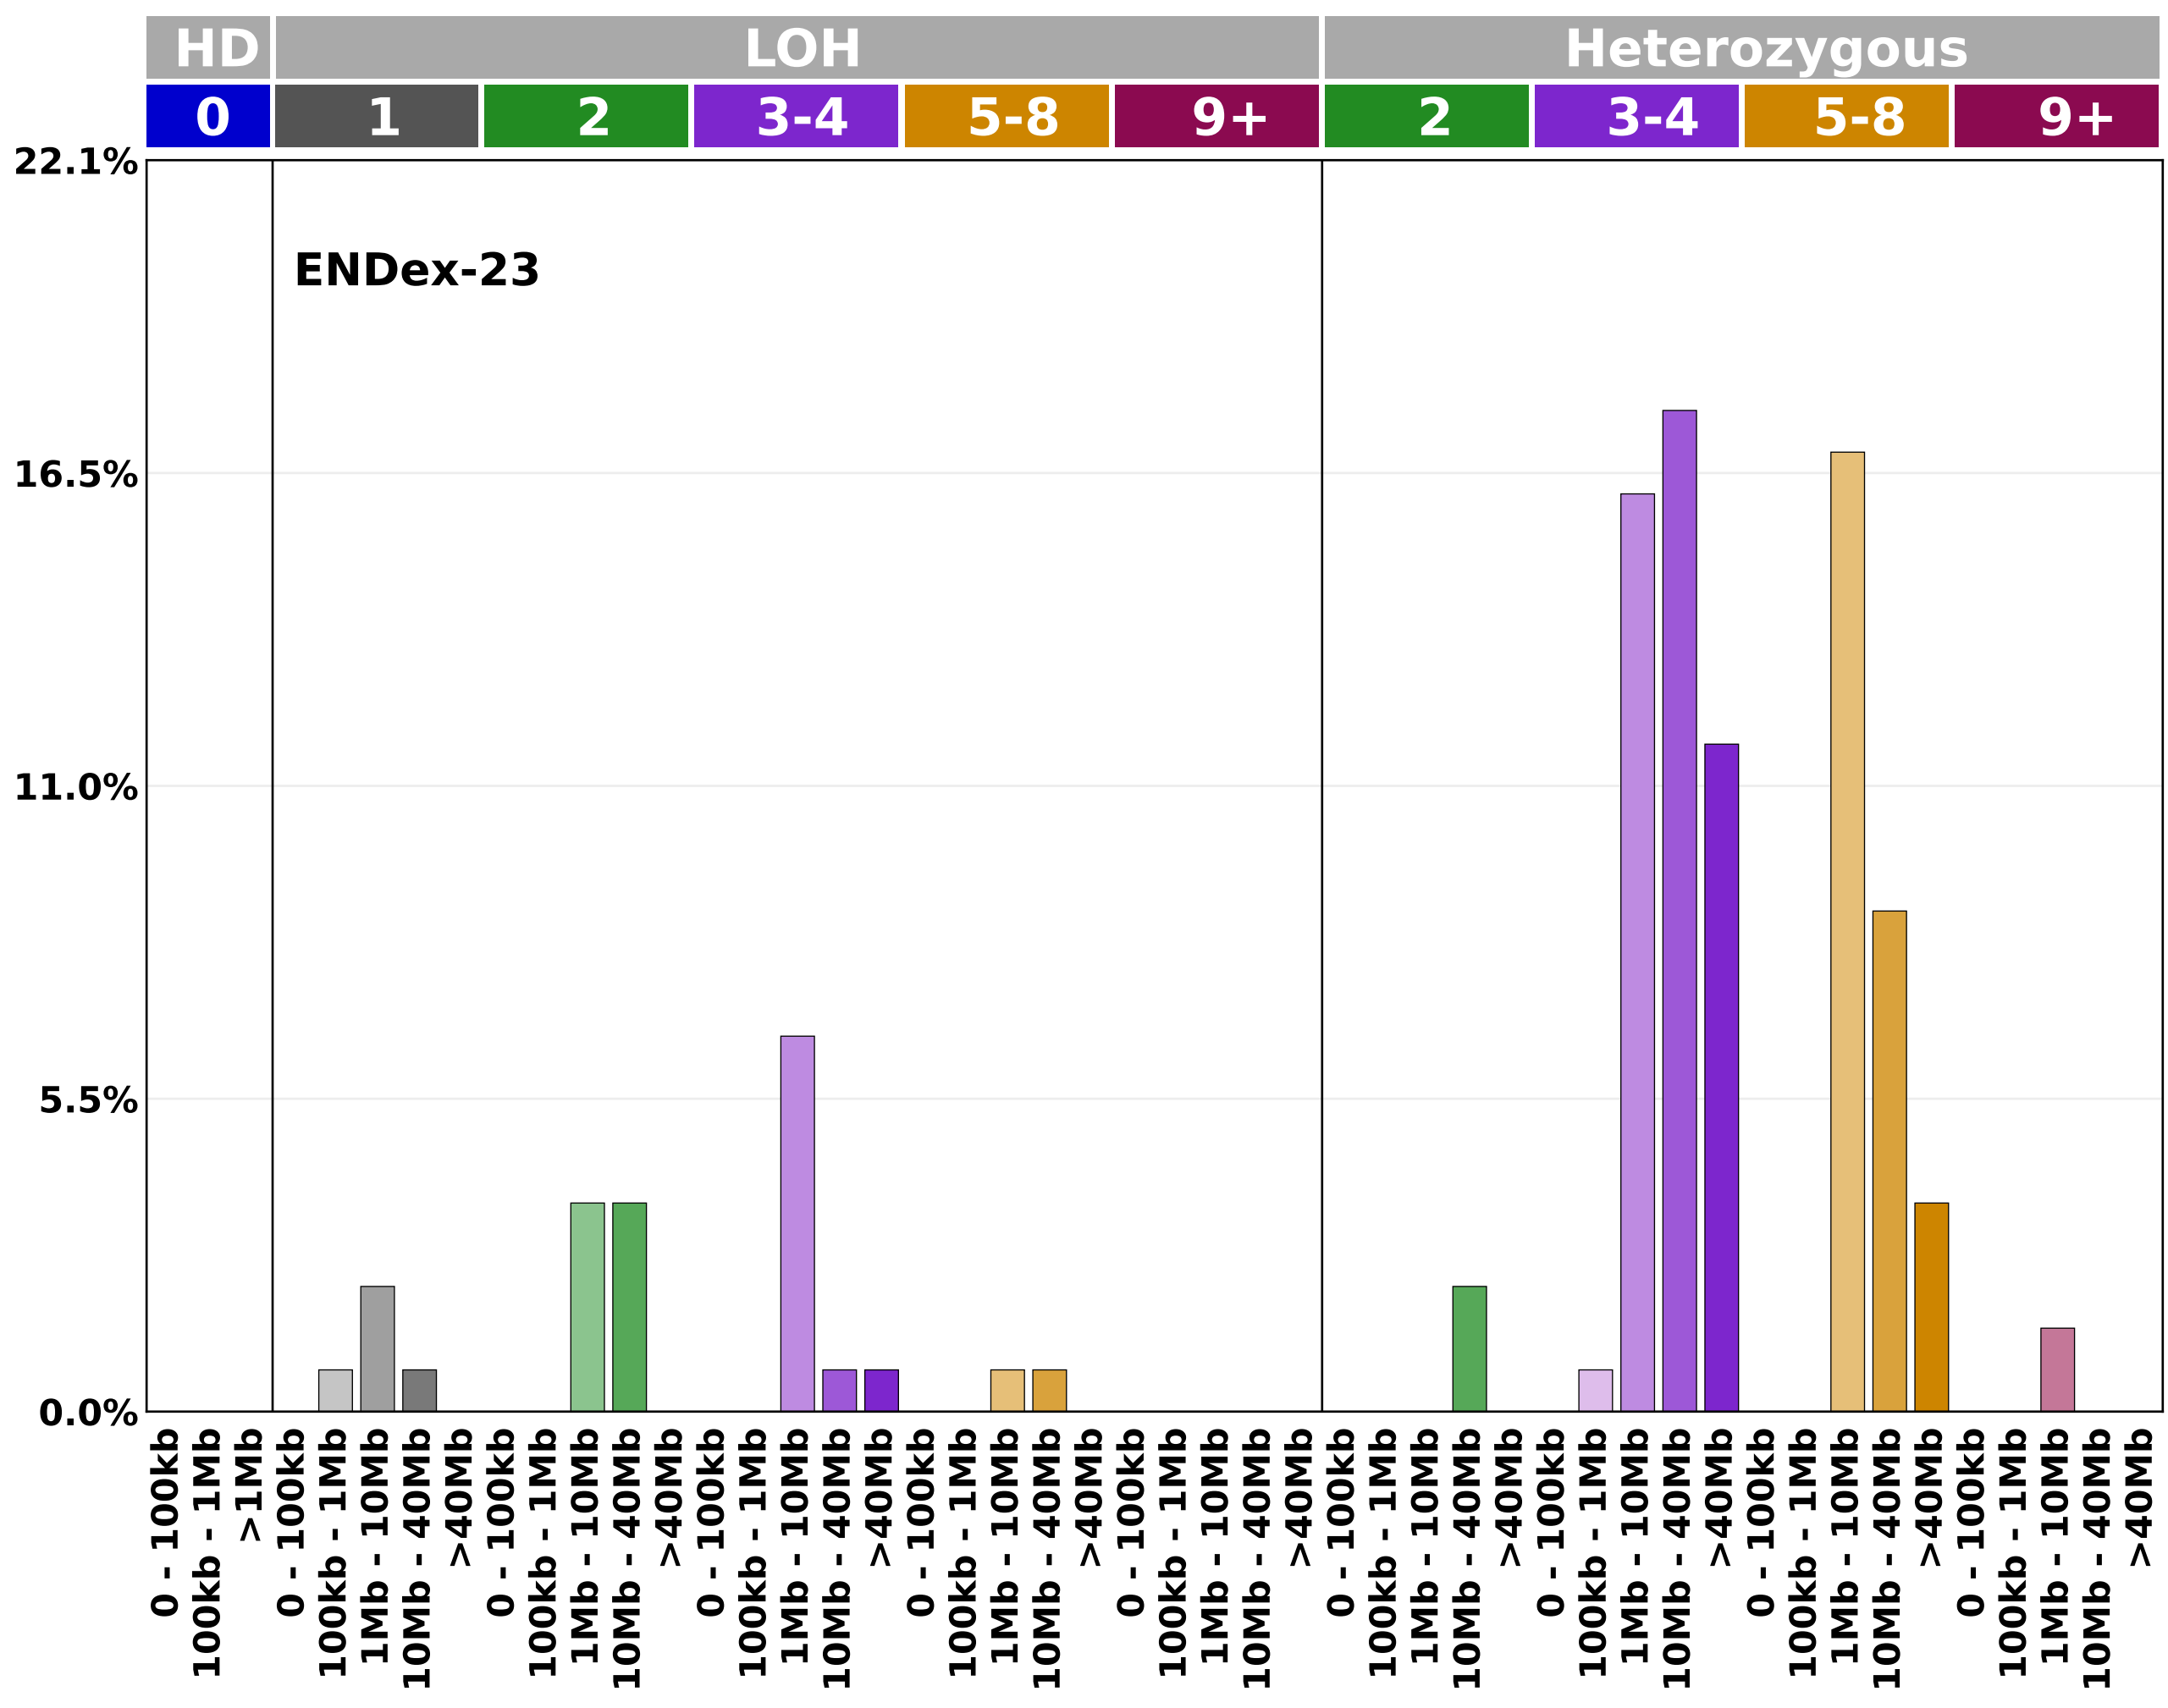



# Percentage of Copy Number Segments

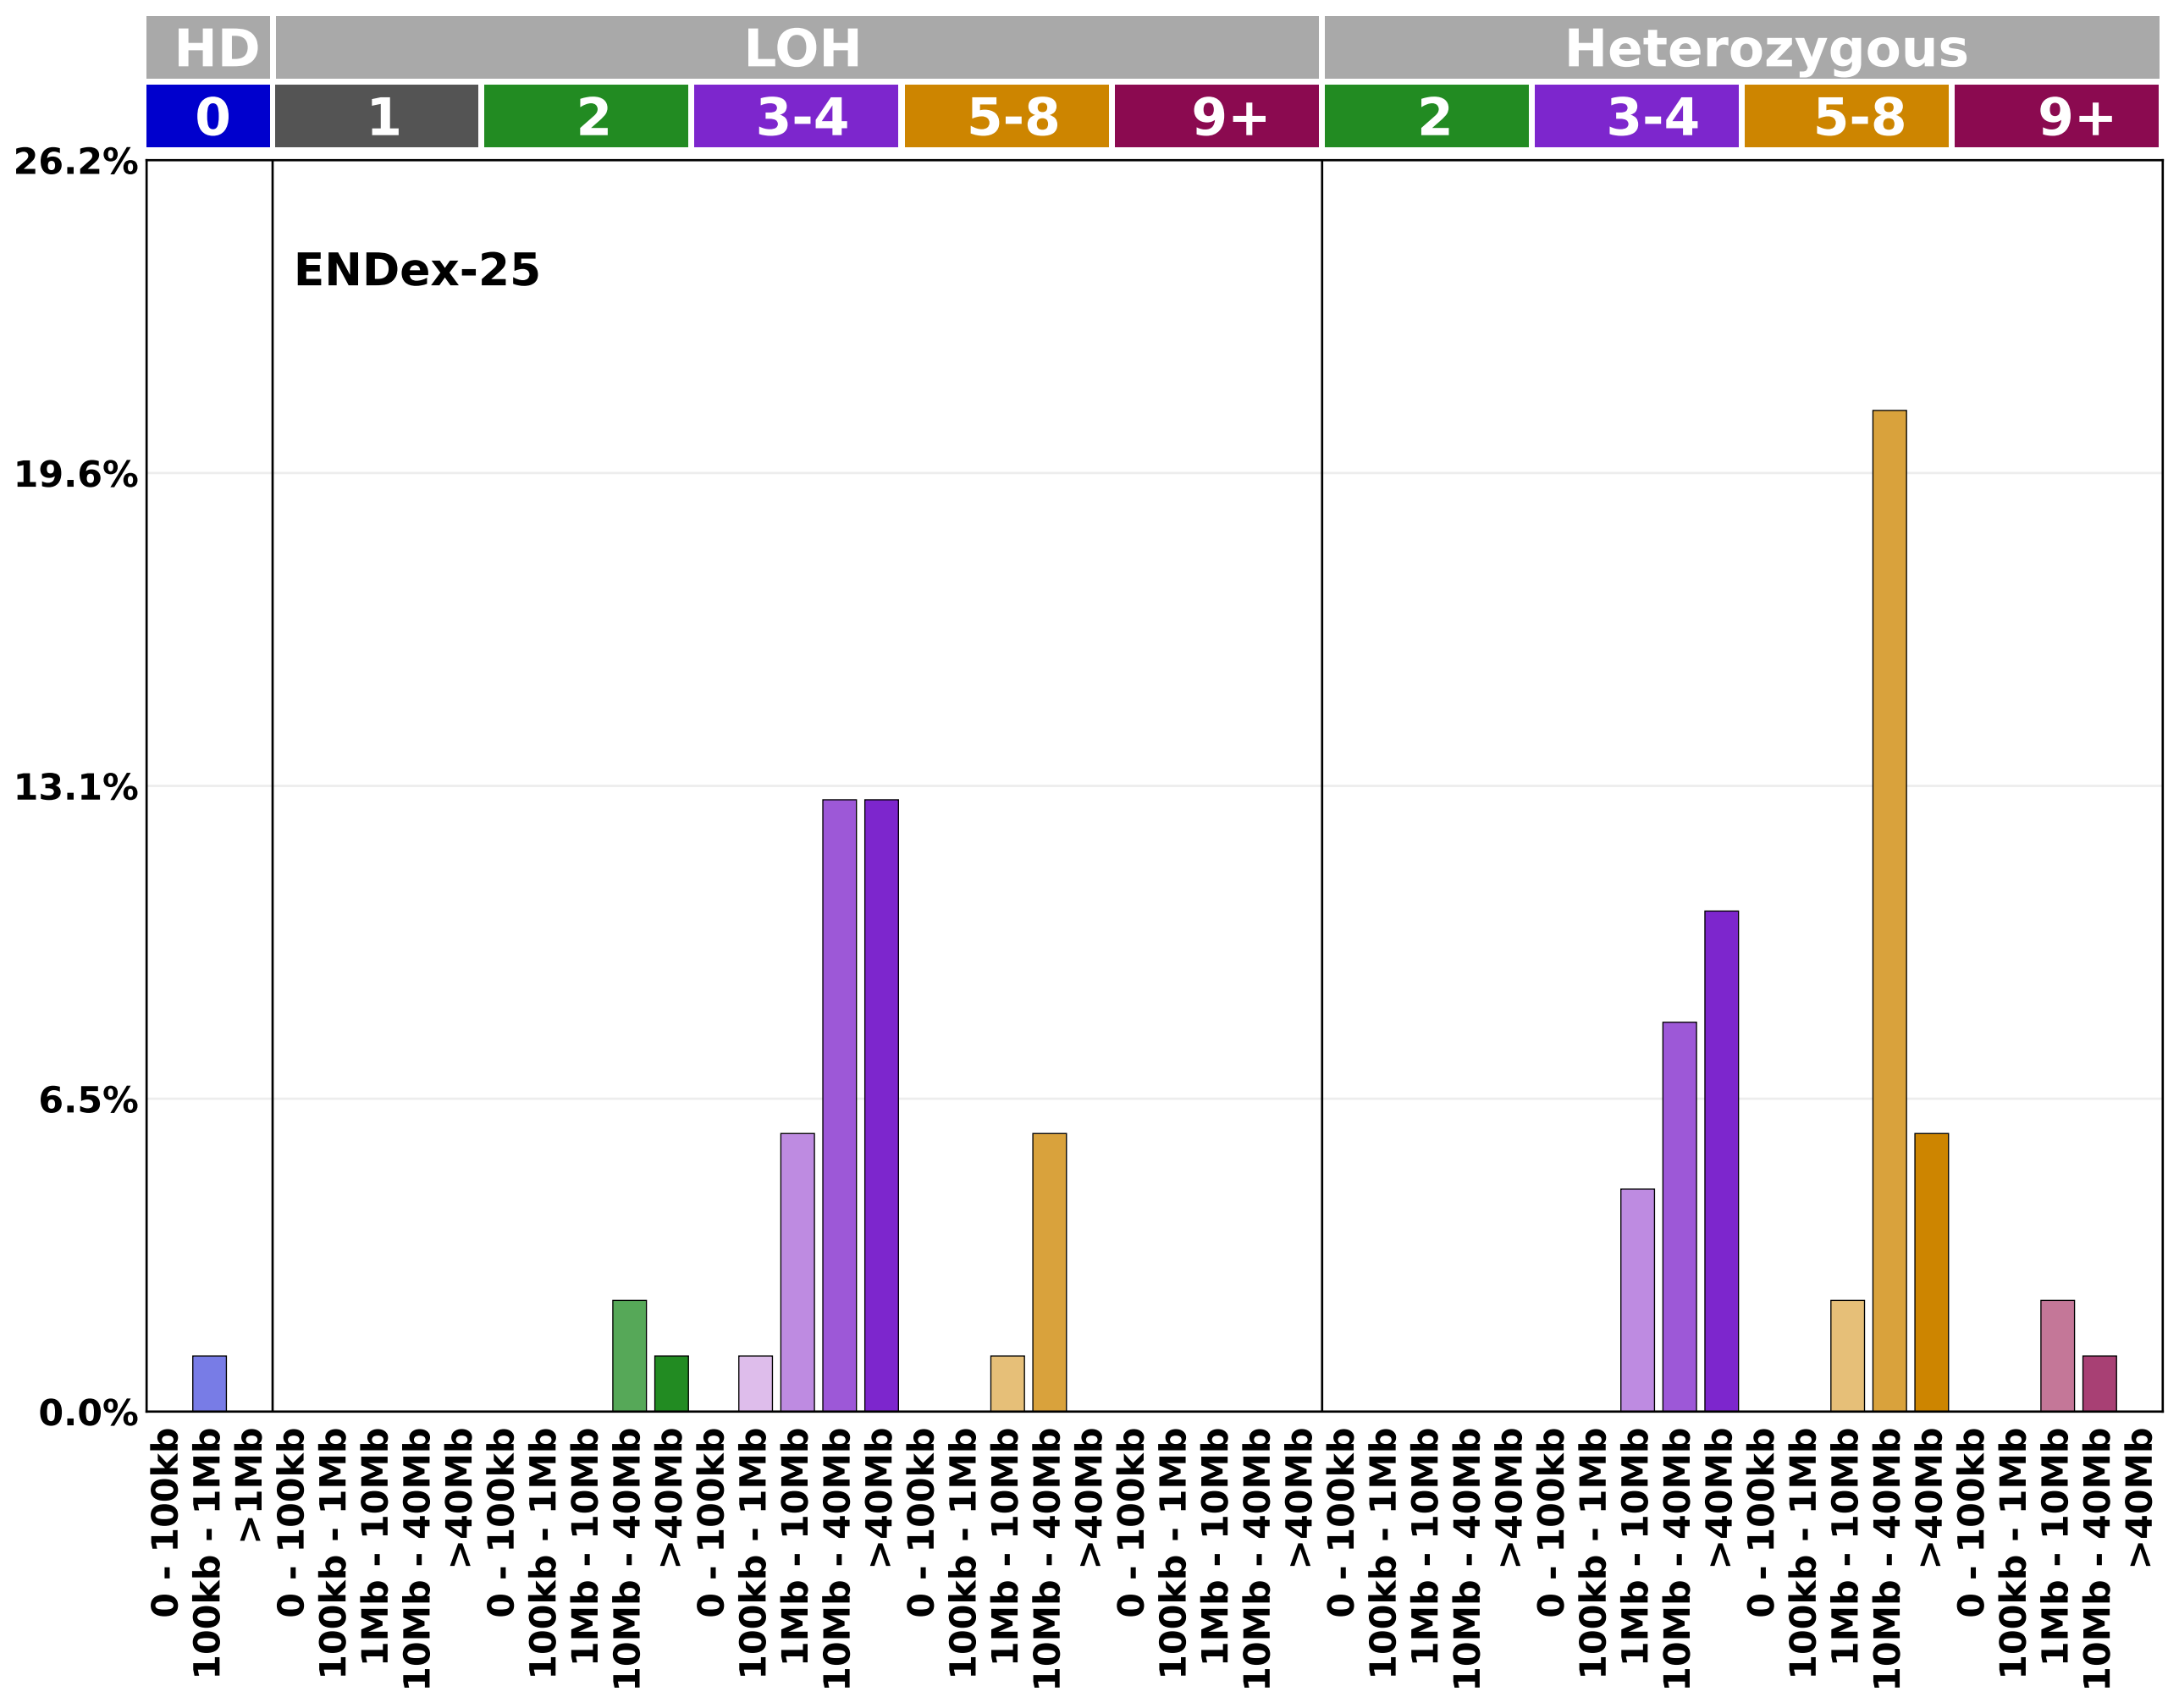

# Percentage of Copy Number Segments

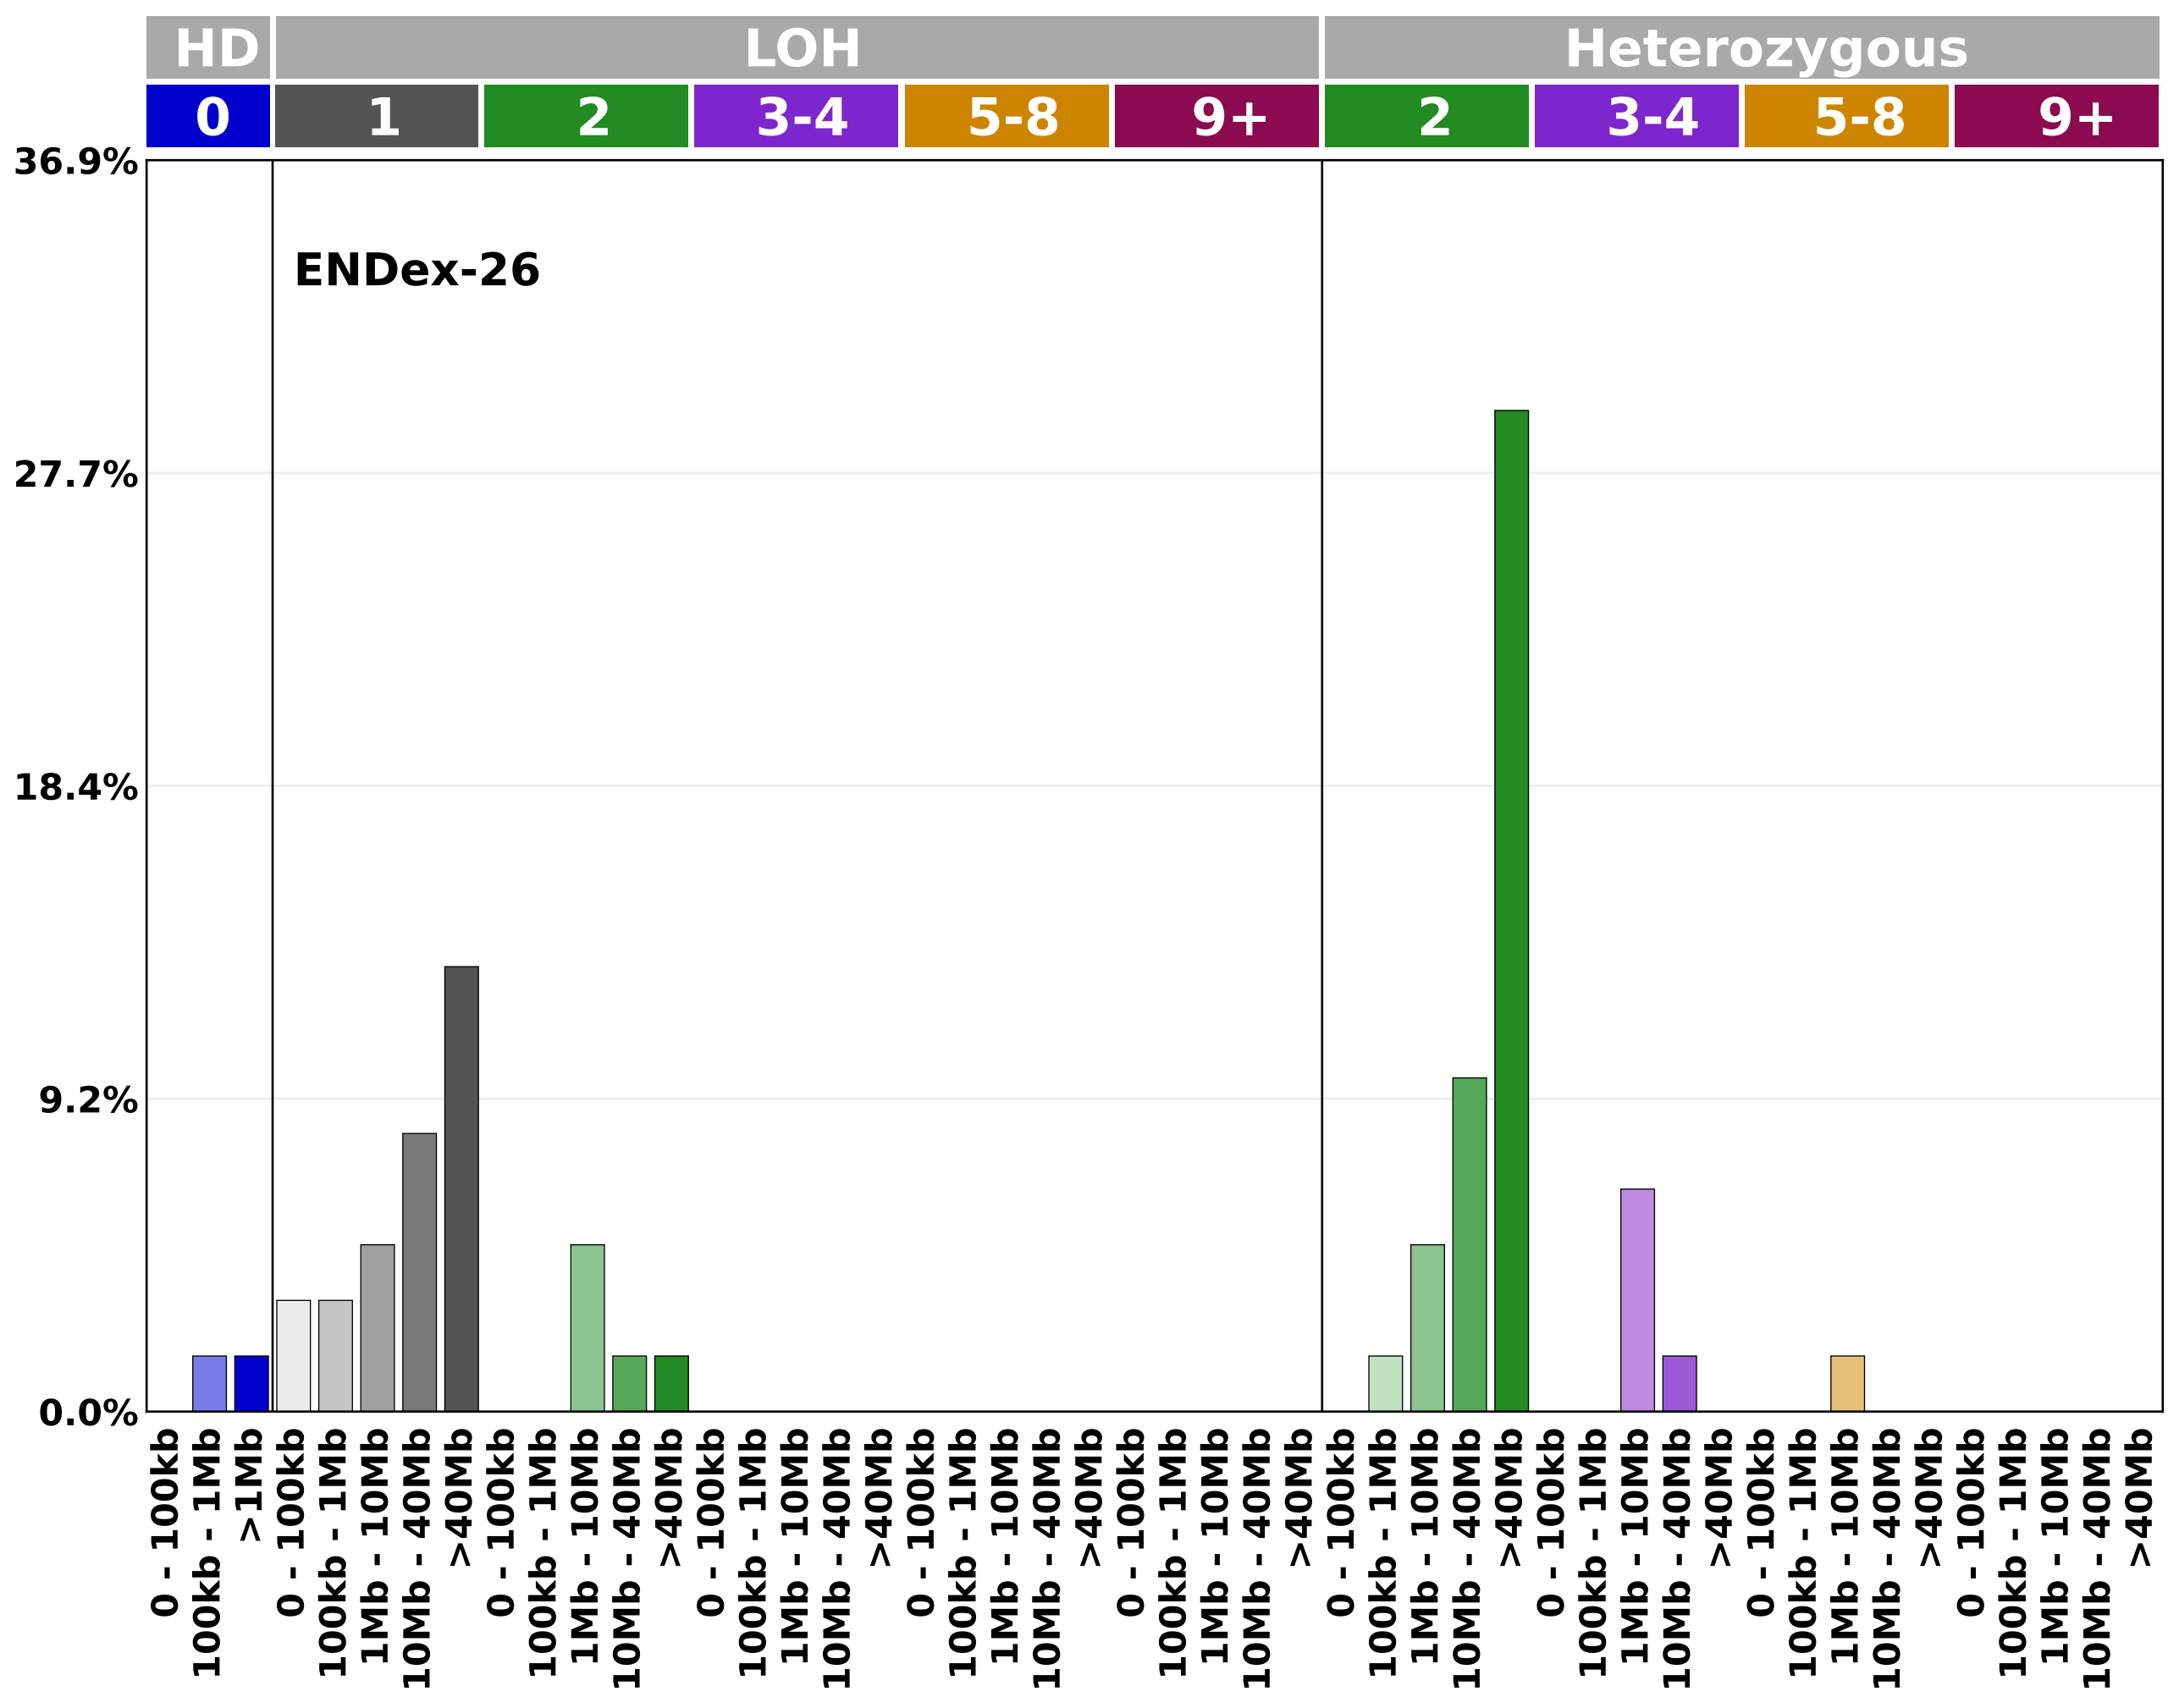

# Percentage of Copy Number Segments

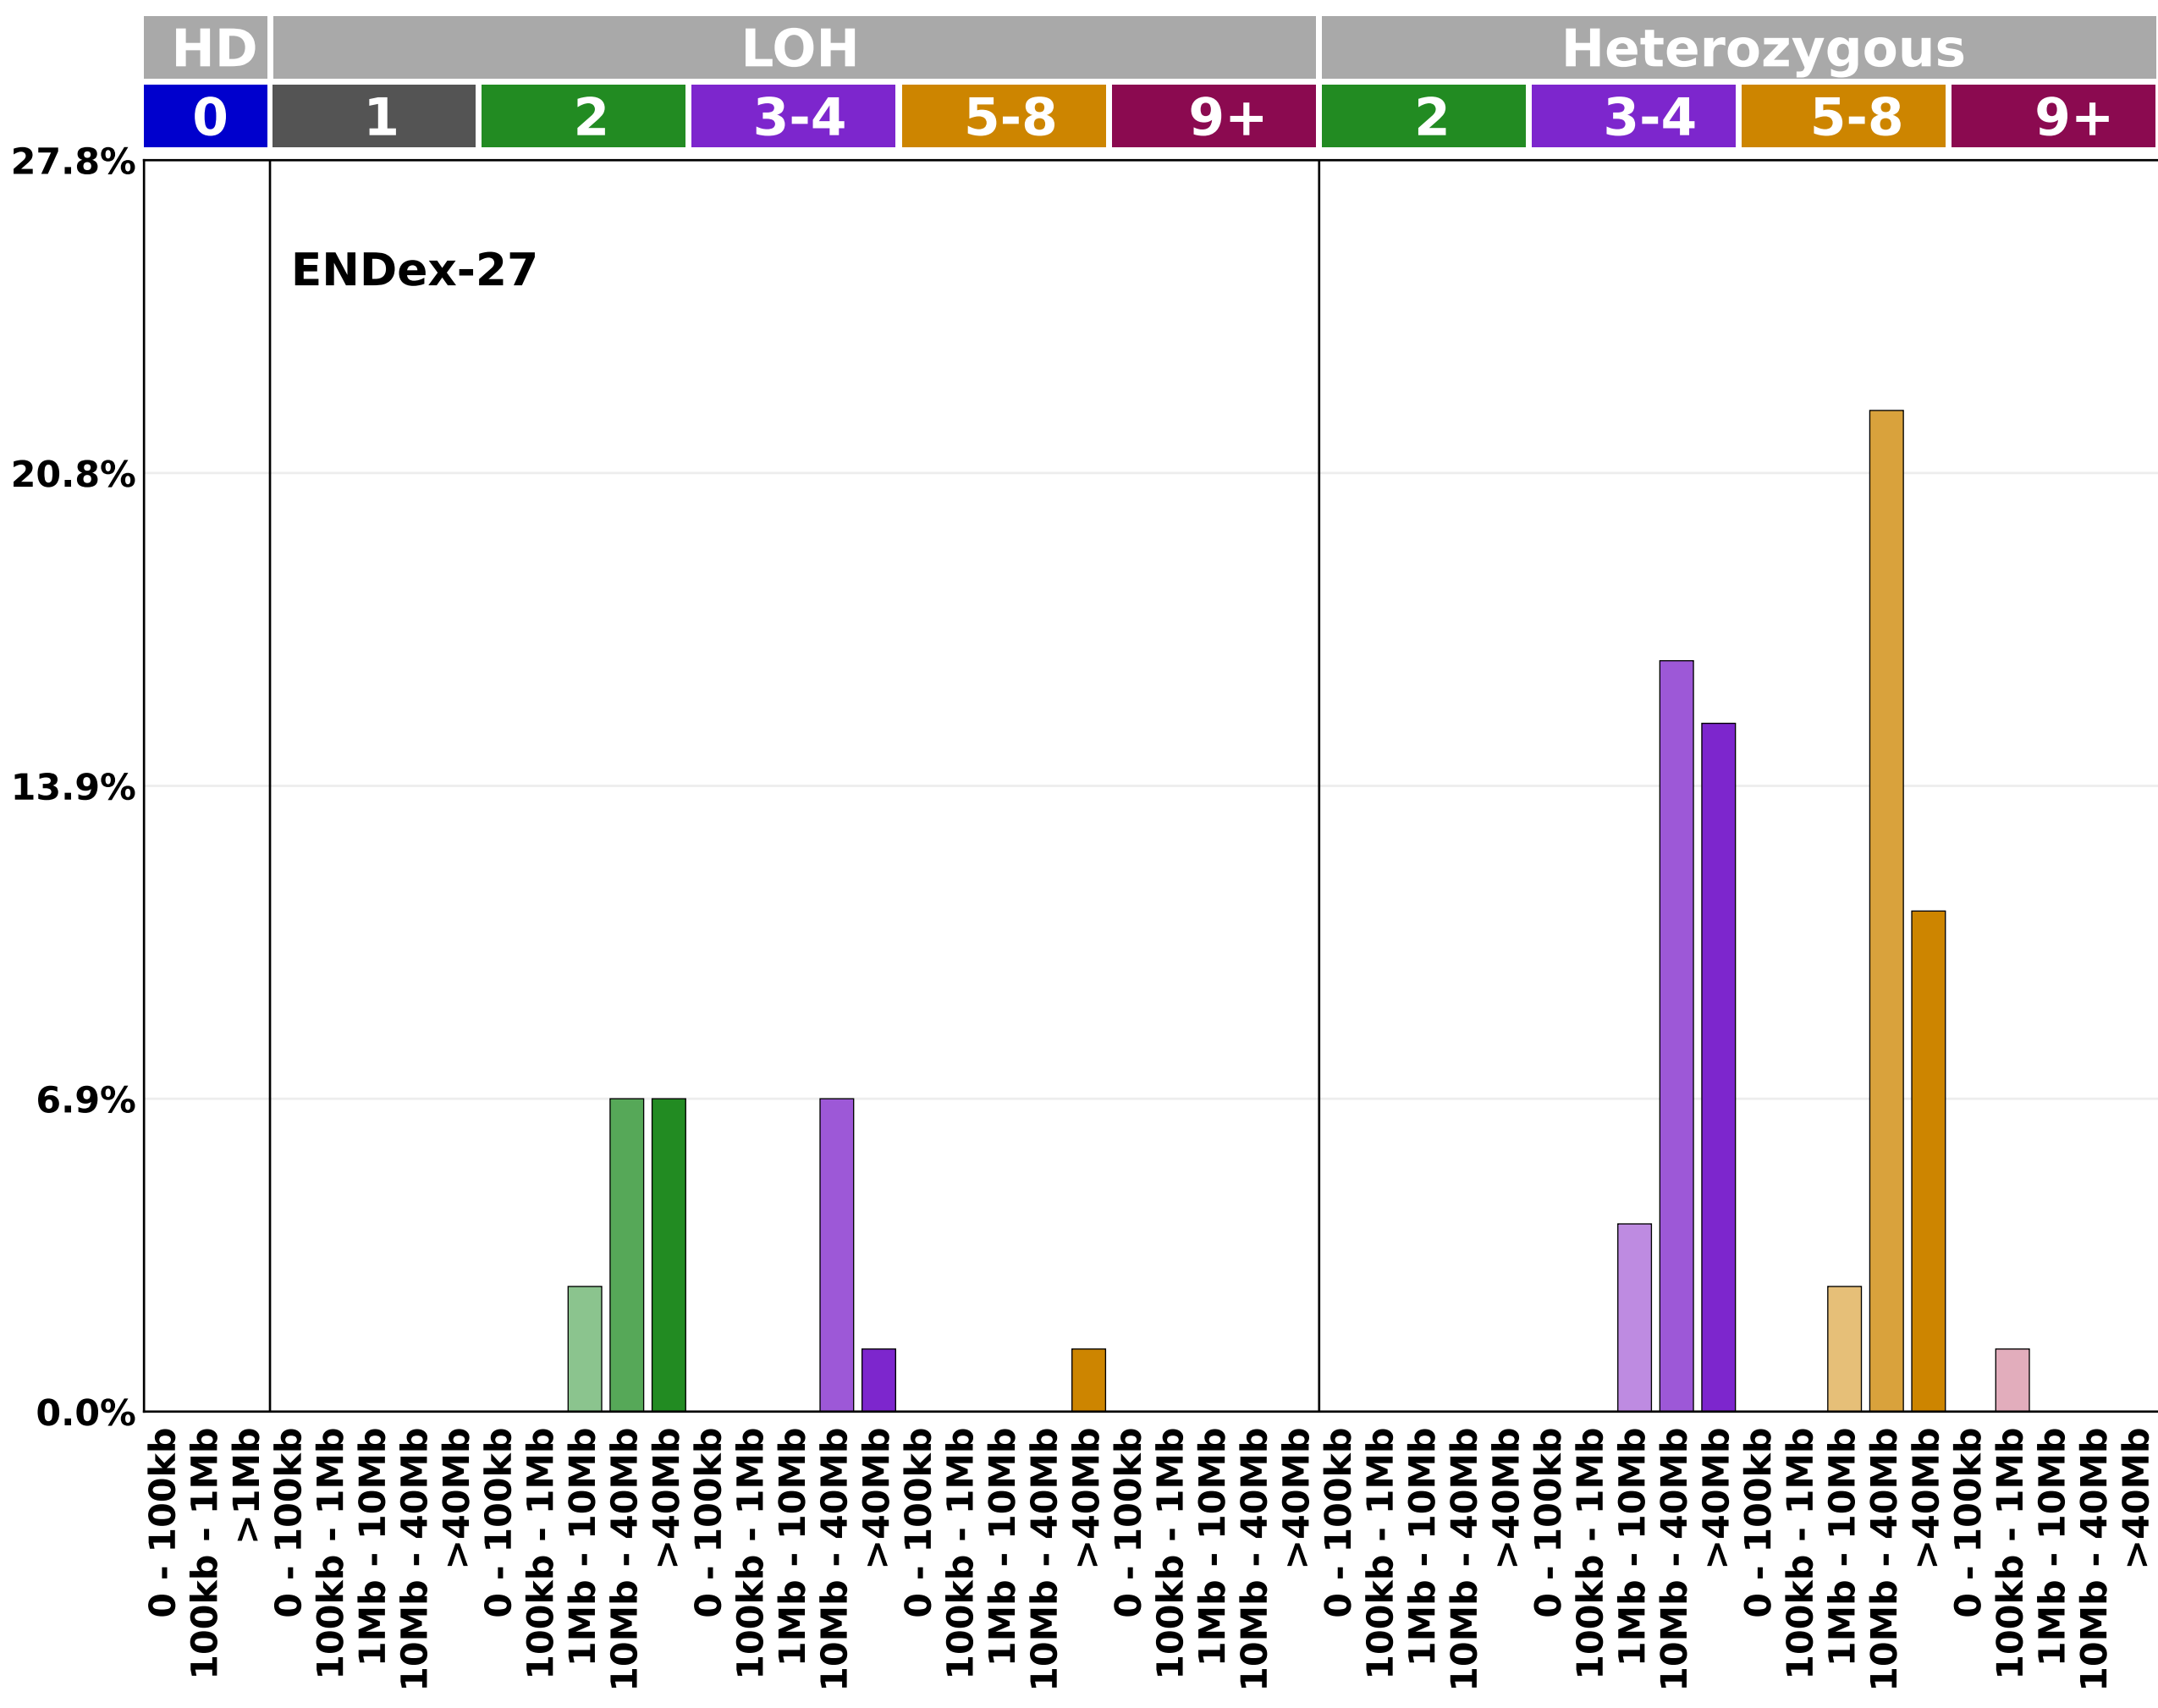

# Percentage of Copy Number Segments

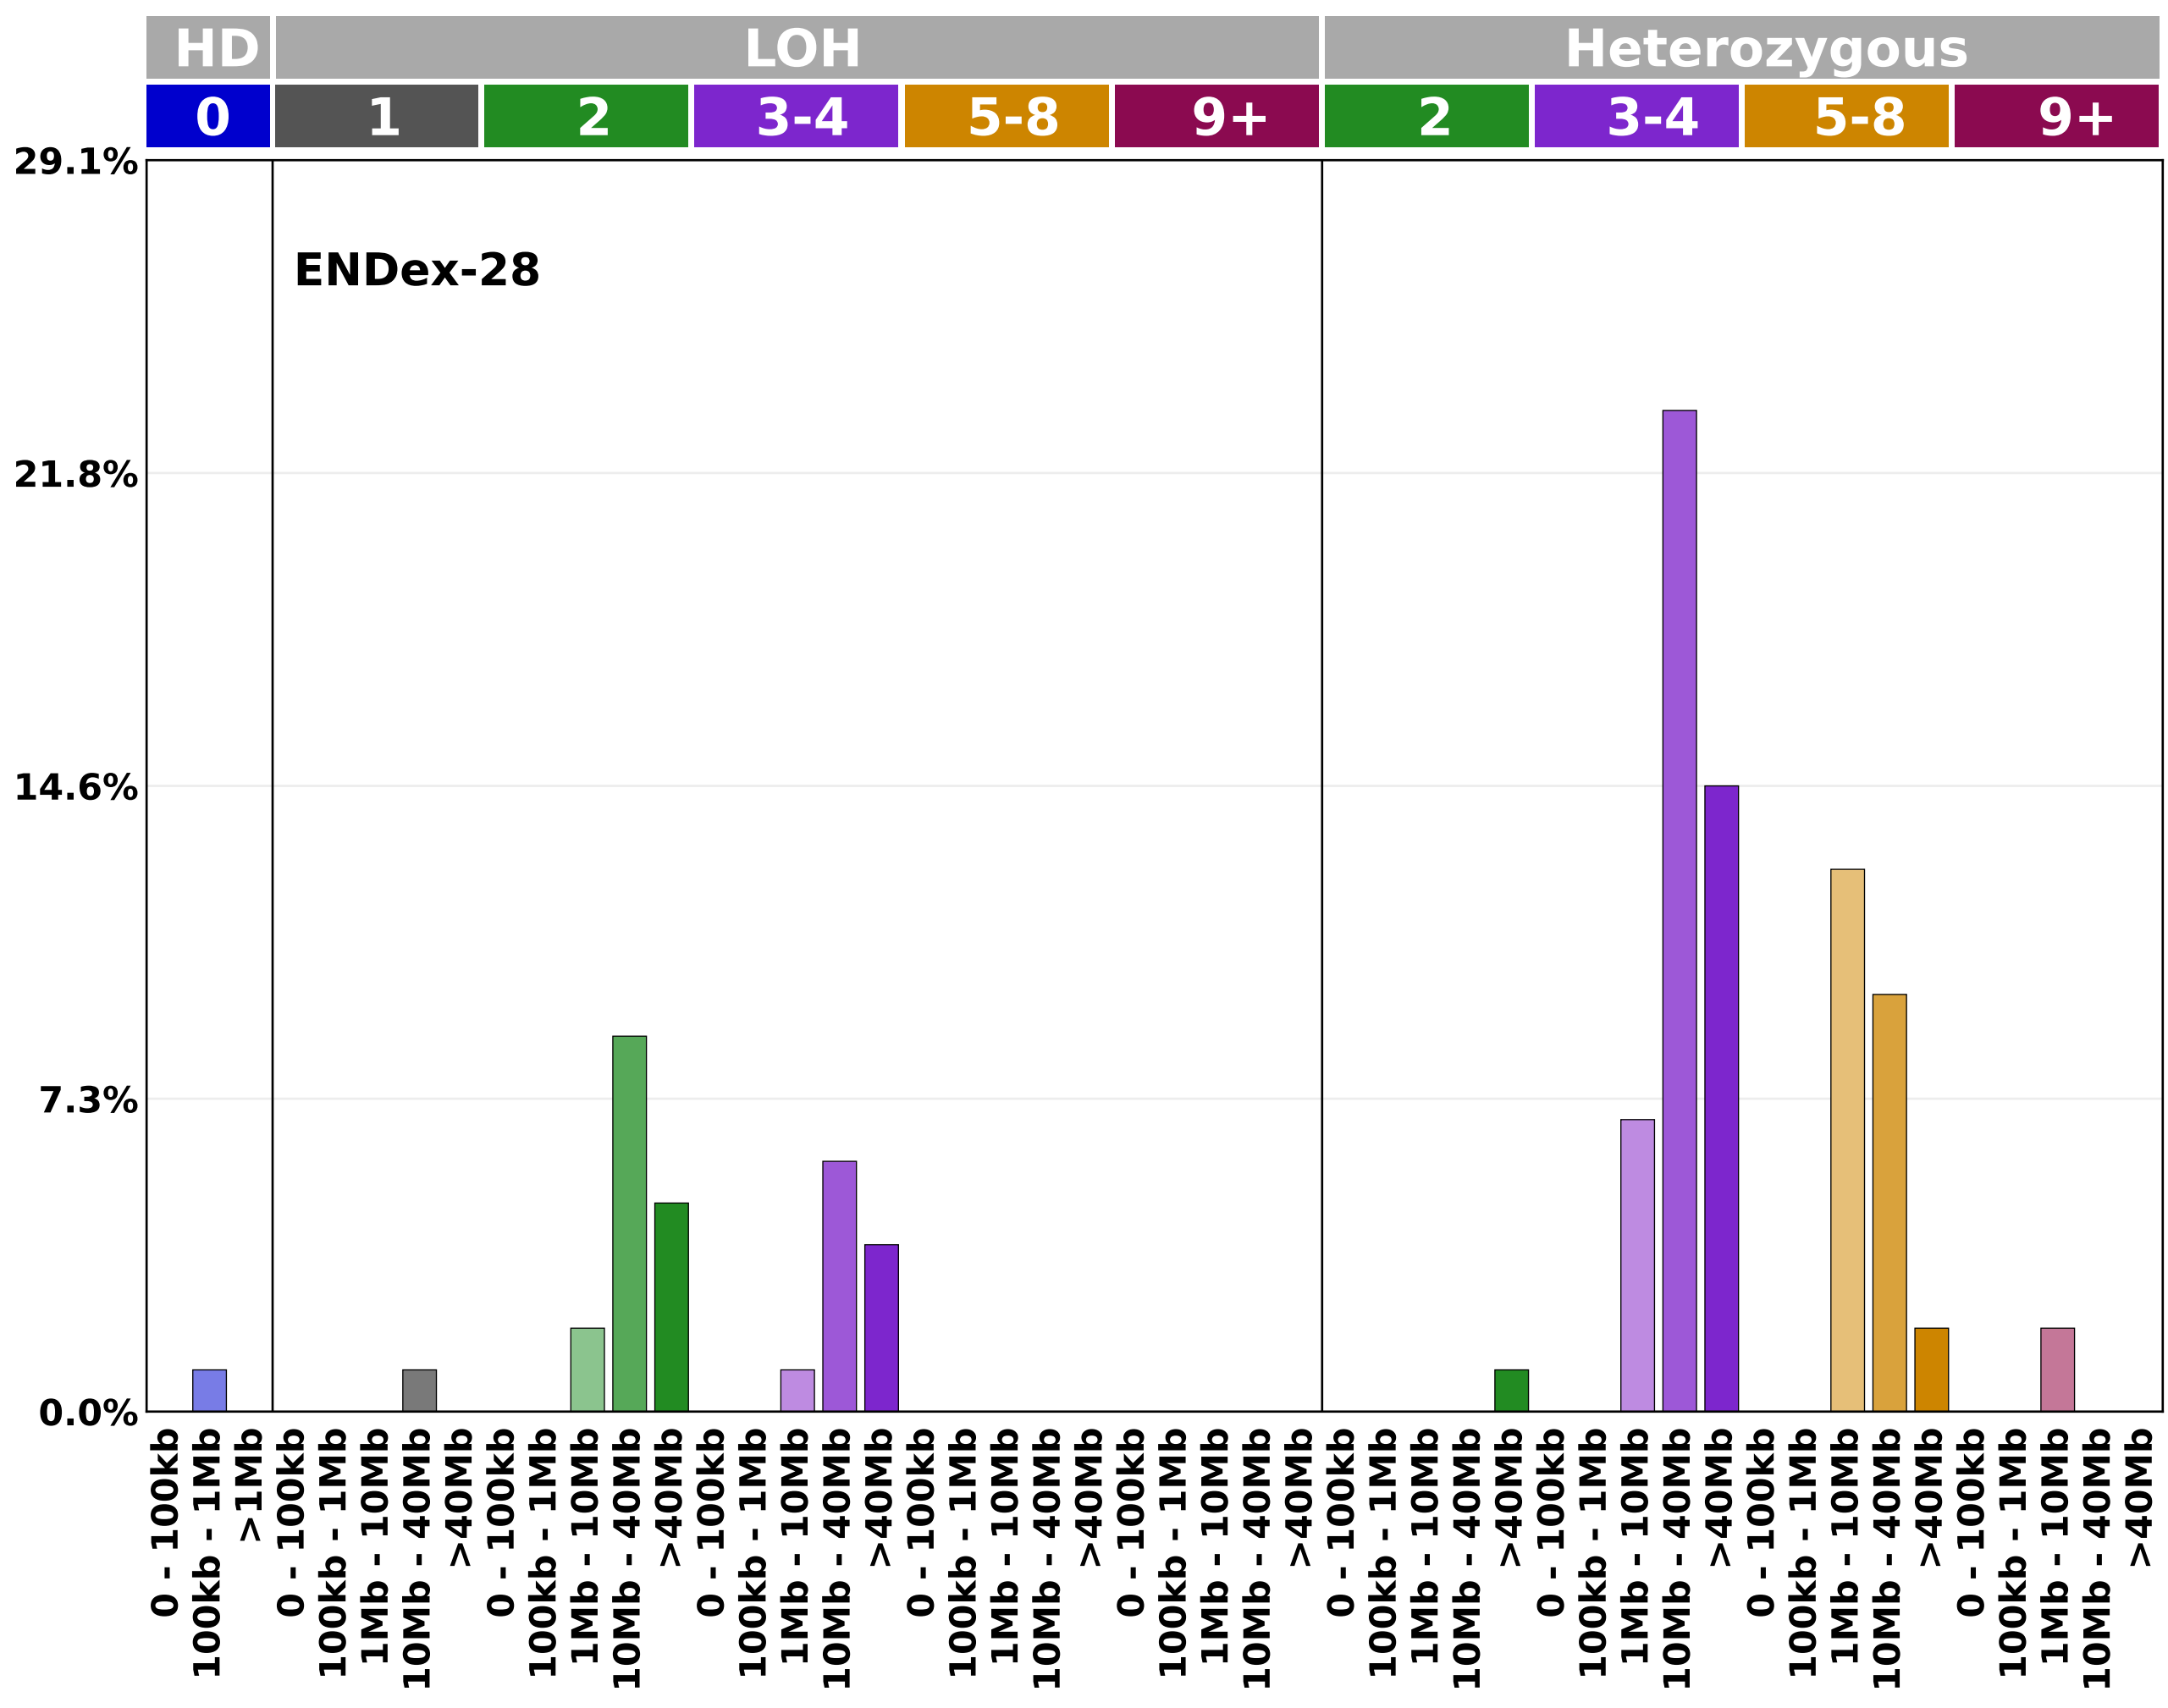



# Percentage of Copy Number Segments

HD LOH Heterozygous

0 1 2 3-4 5-8 9+ 2 3-4 5-8 9+

19.2%  
14.4%  
9.6%  
4.8%  
0.0%

**ENDex-30**

0 - 100kb  
100kb - 1Mb  
>1Mb  
0 - 100kb  
100kb - 1Mb  
1Mb - 10Mb  
10Mb - 40Mb  
>40Mb  
0 - 100kb  
100kb - 1Mb  
1Mb - 10Mb  
10Mb - 40Mb  
>40Mb  
0 - 100kb  
100kb - 1Mb  
1Mb - 10Mb  
10Mb - 40Mb  
>40Mb  
0 - 100kb  
100kb - 1Mb  
1Mb - 10Mb  
10Mb - 40Mb  
>40Mb  
0 - 100kb  
100kb - 1Mb  
1Mb - 10Mb  
10Mb - 40Mb  
>40Mb  
0 - 100kb  
100kb - 1Mb  
1Mb - 10Mb  
10Mb - 40Mb  
>40Mb  
0 - 100kb  
100kb - 1Mb  
1Mb - 10Mb  
10Mb - 40Mb  
>40Mb  
0 - 100kb  
100kb - 1Mb  
1Mb - 10Mb  
10Mb - 40Mb  
>40Mb

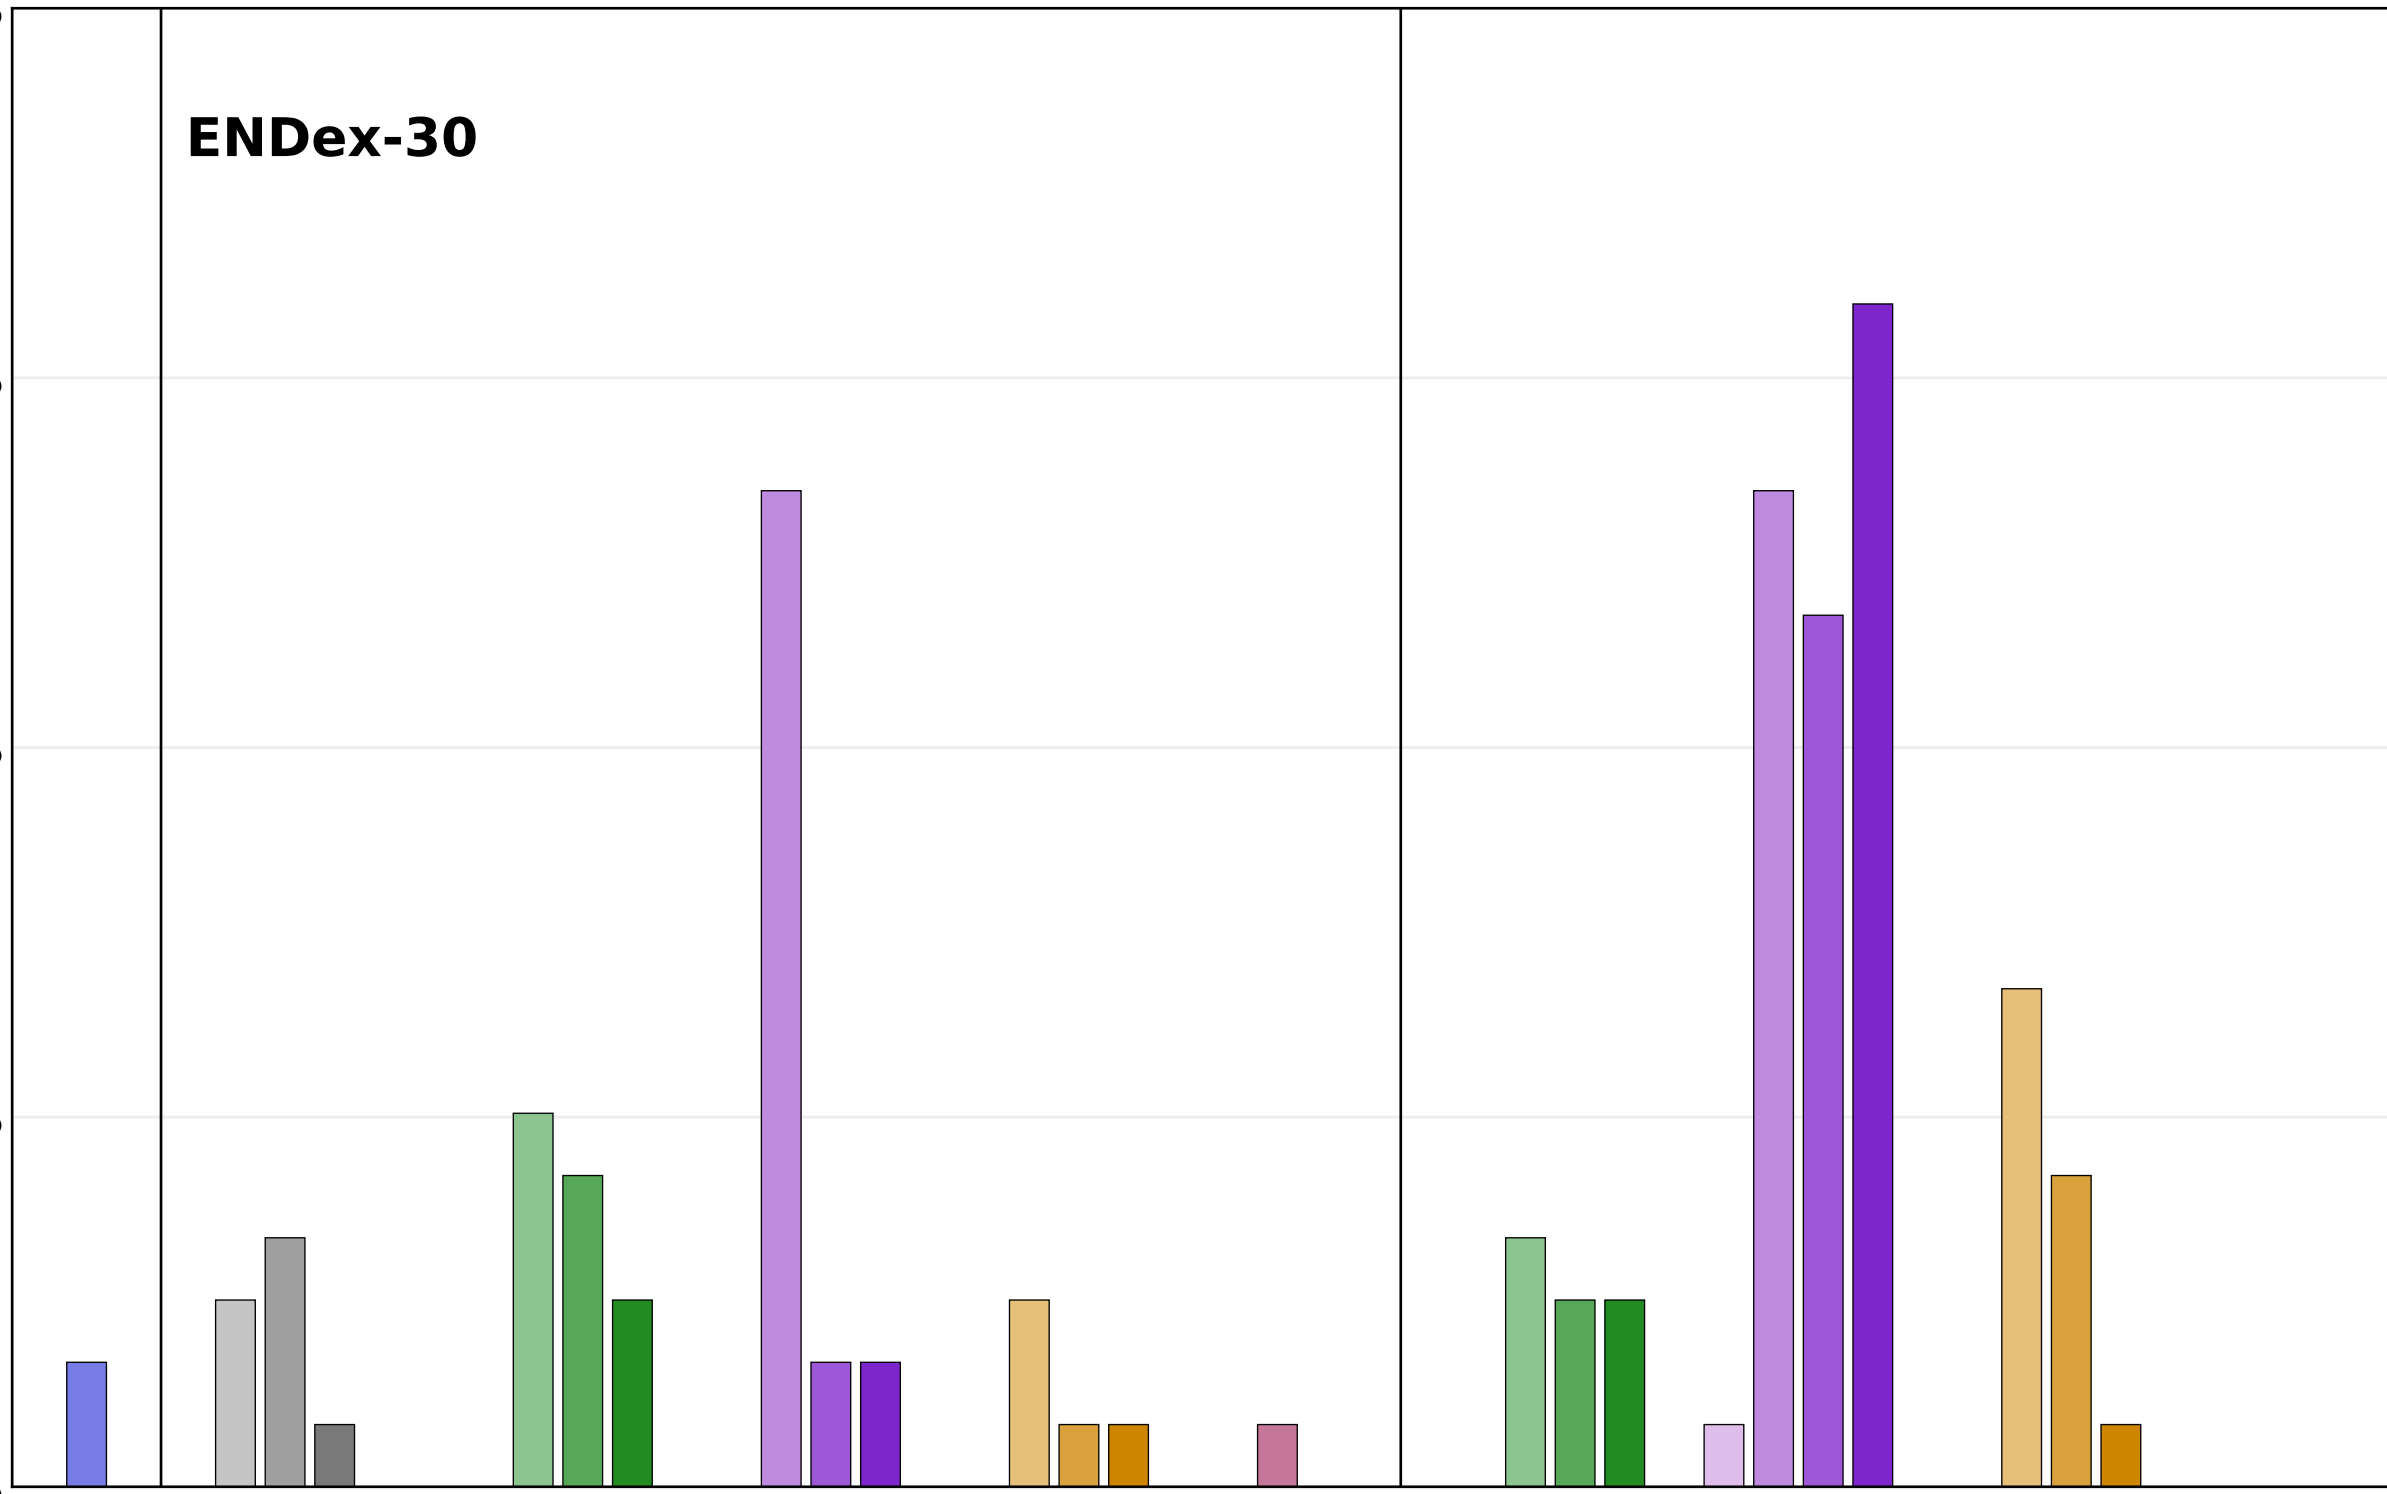

Supplement: 13402_2024_942_MOESM3_ESM.pdf [file 13402_2024_942_MOESM3_ESM.pdf]
