# Supplementary material for: Copy number signatures and CCNE1 amplification reveal the involvement of replication stress in high-grade endometrial tumors oncogenesis
Source: PubMed Central journal article supplement (PMC11322381; doi:10.1007/s13402-024-00942-w), 2024-04-02

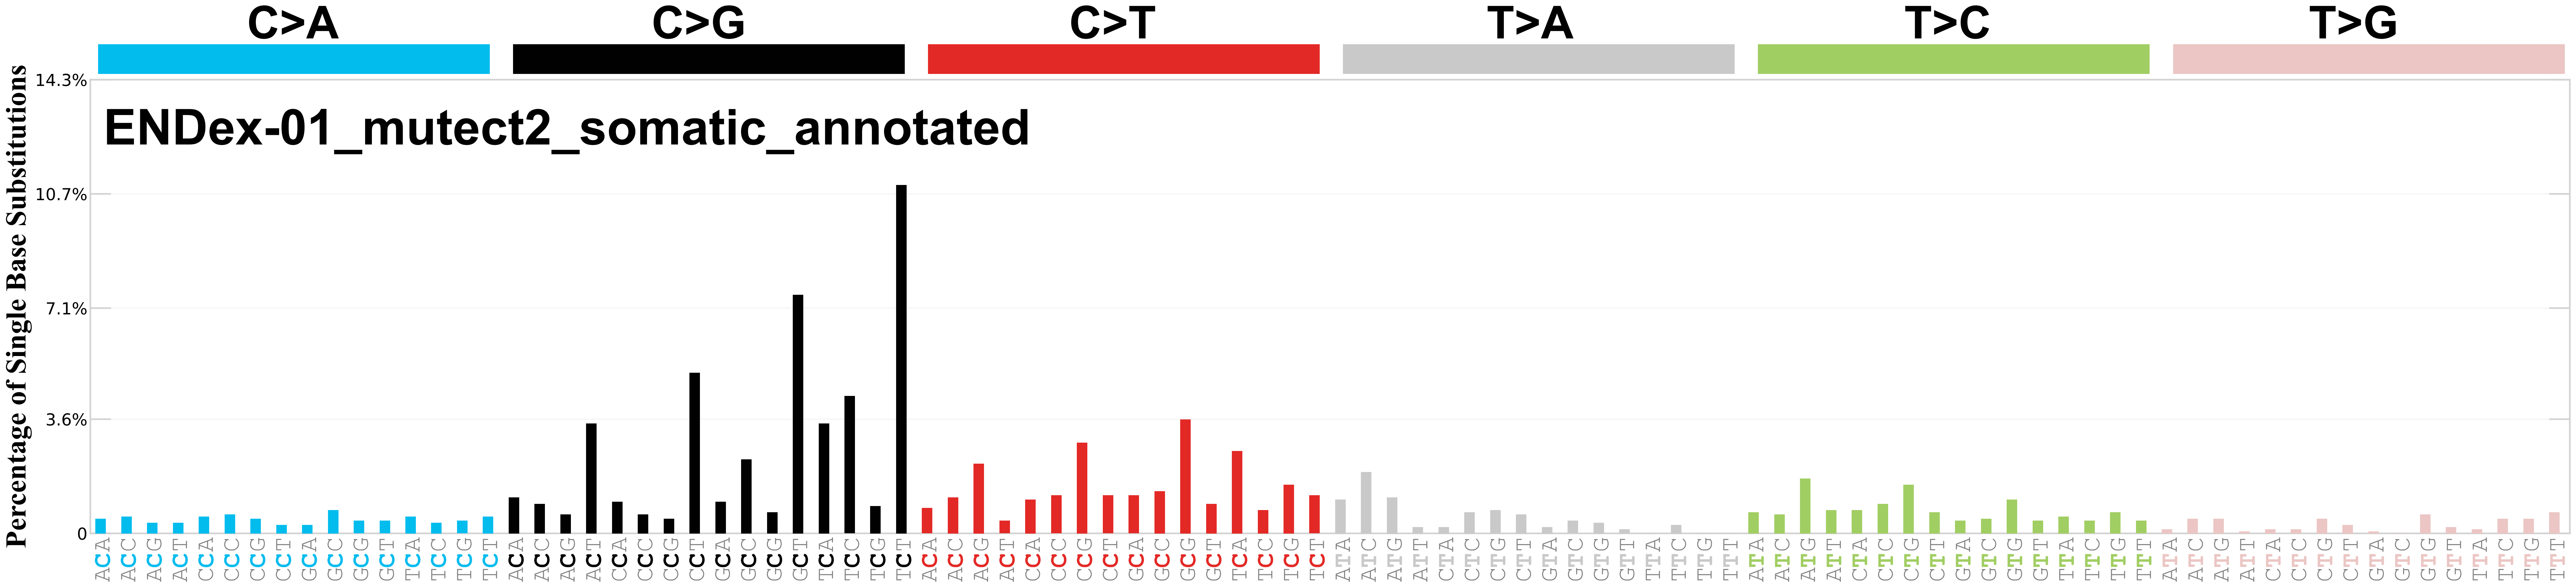

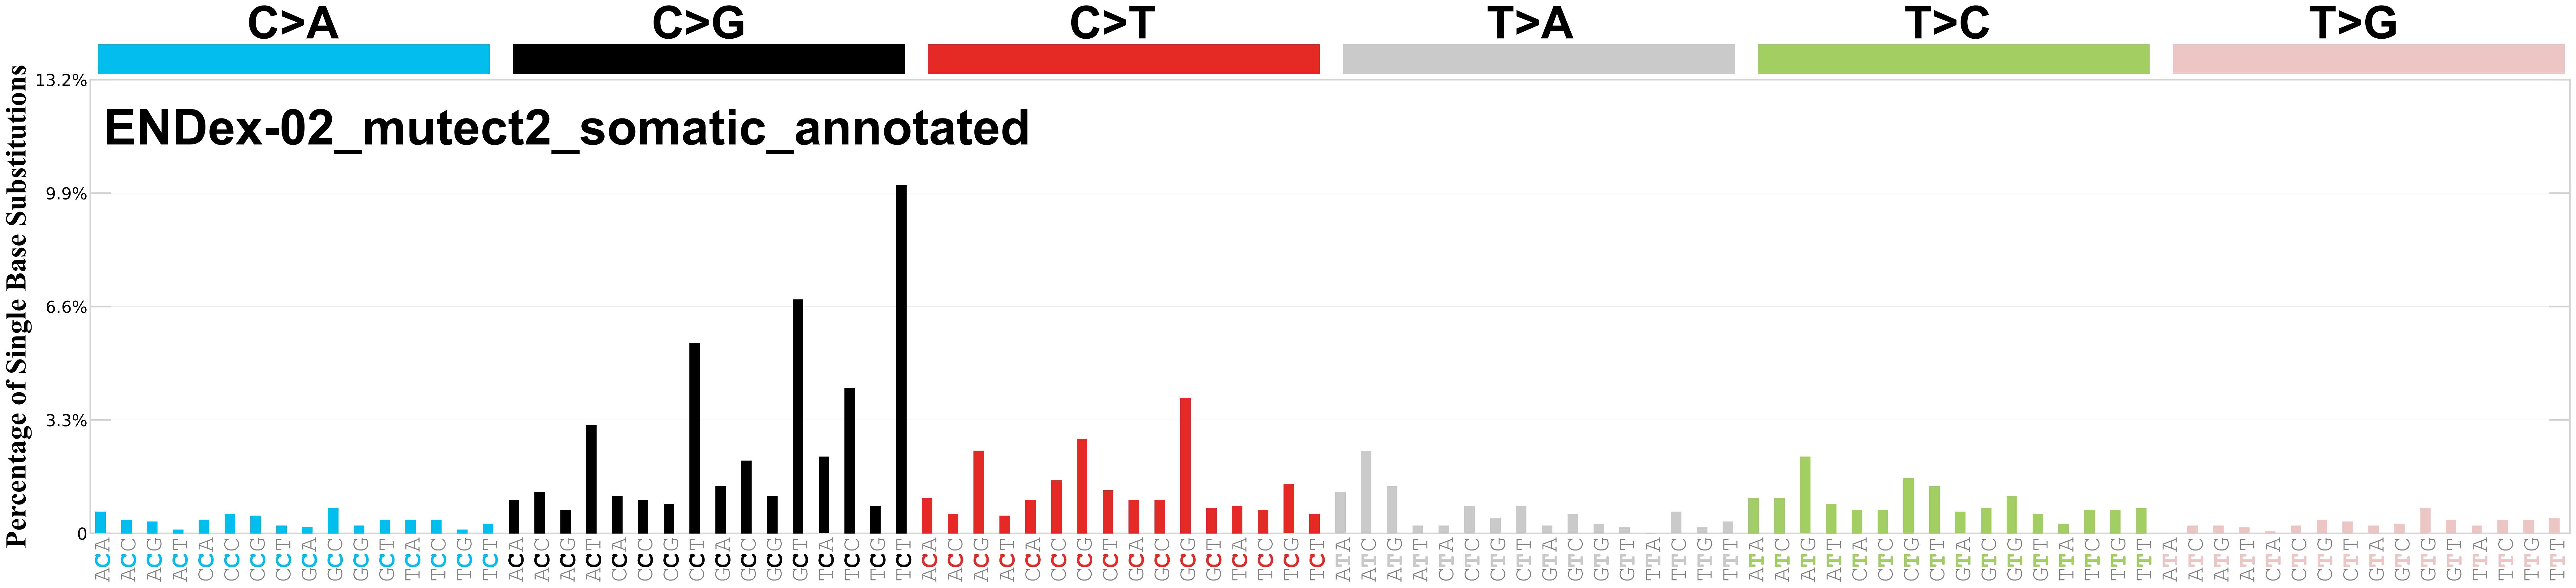

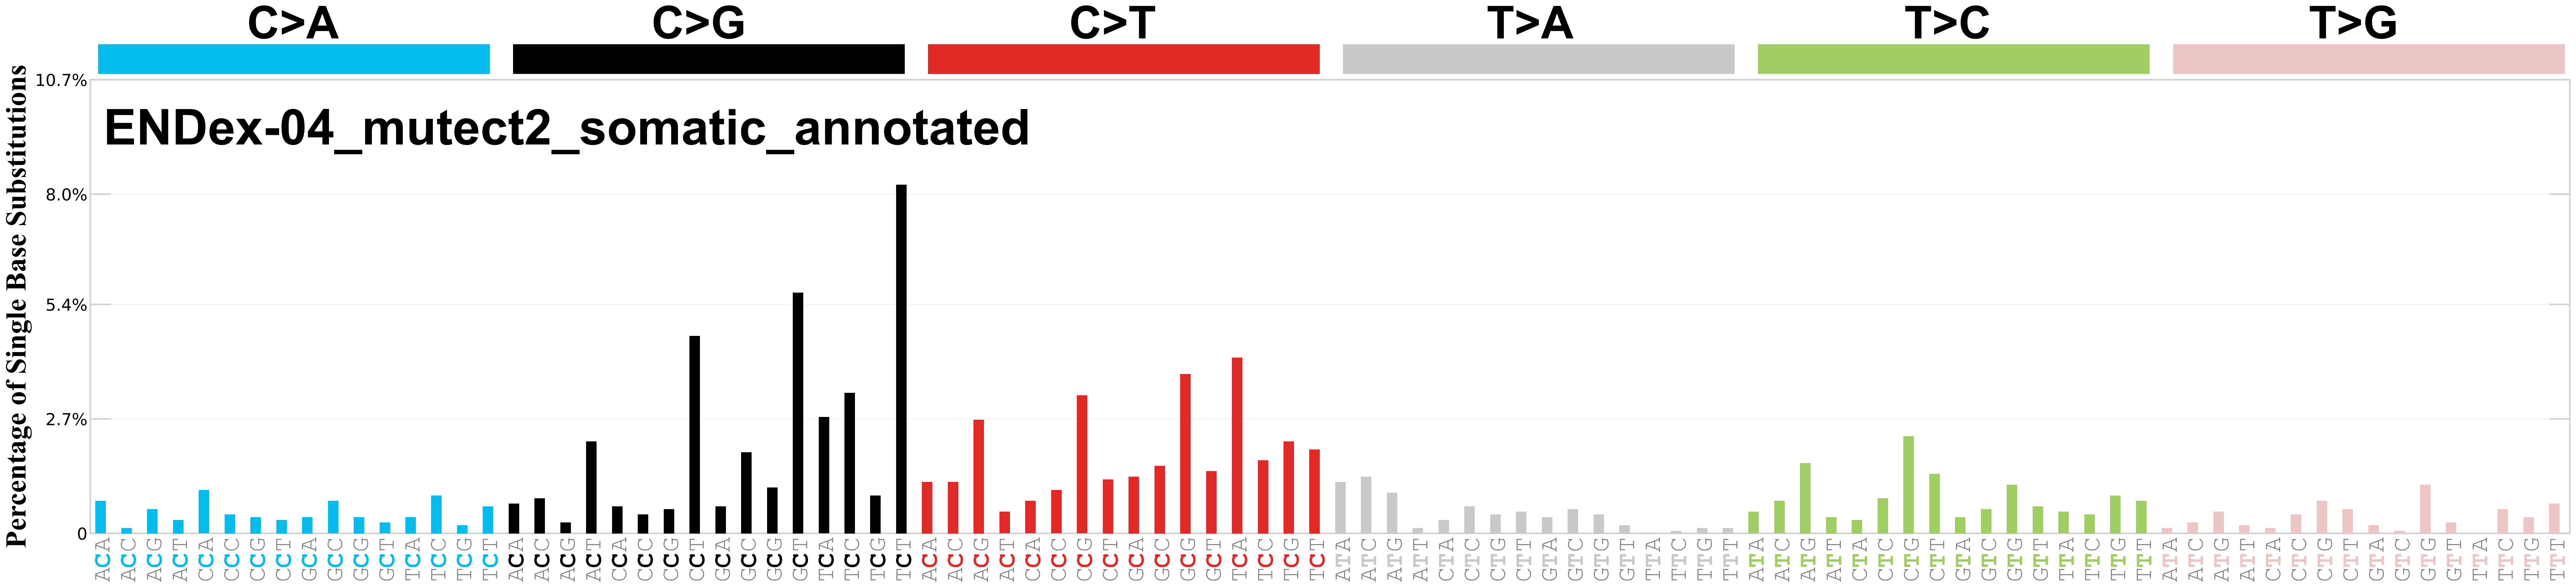

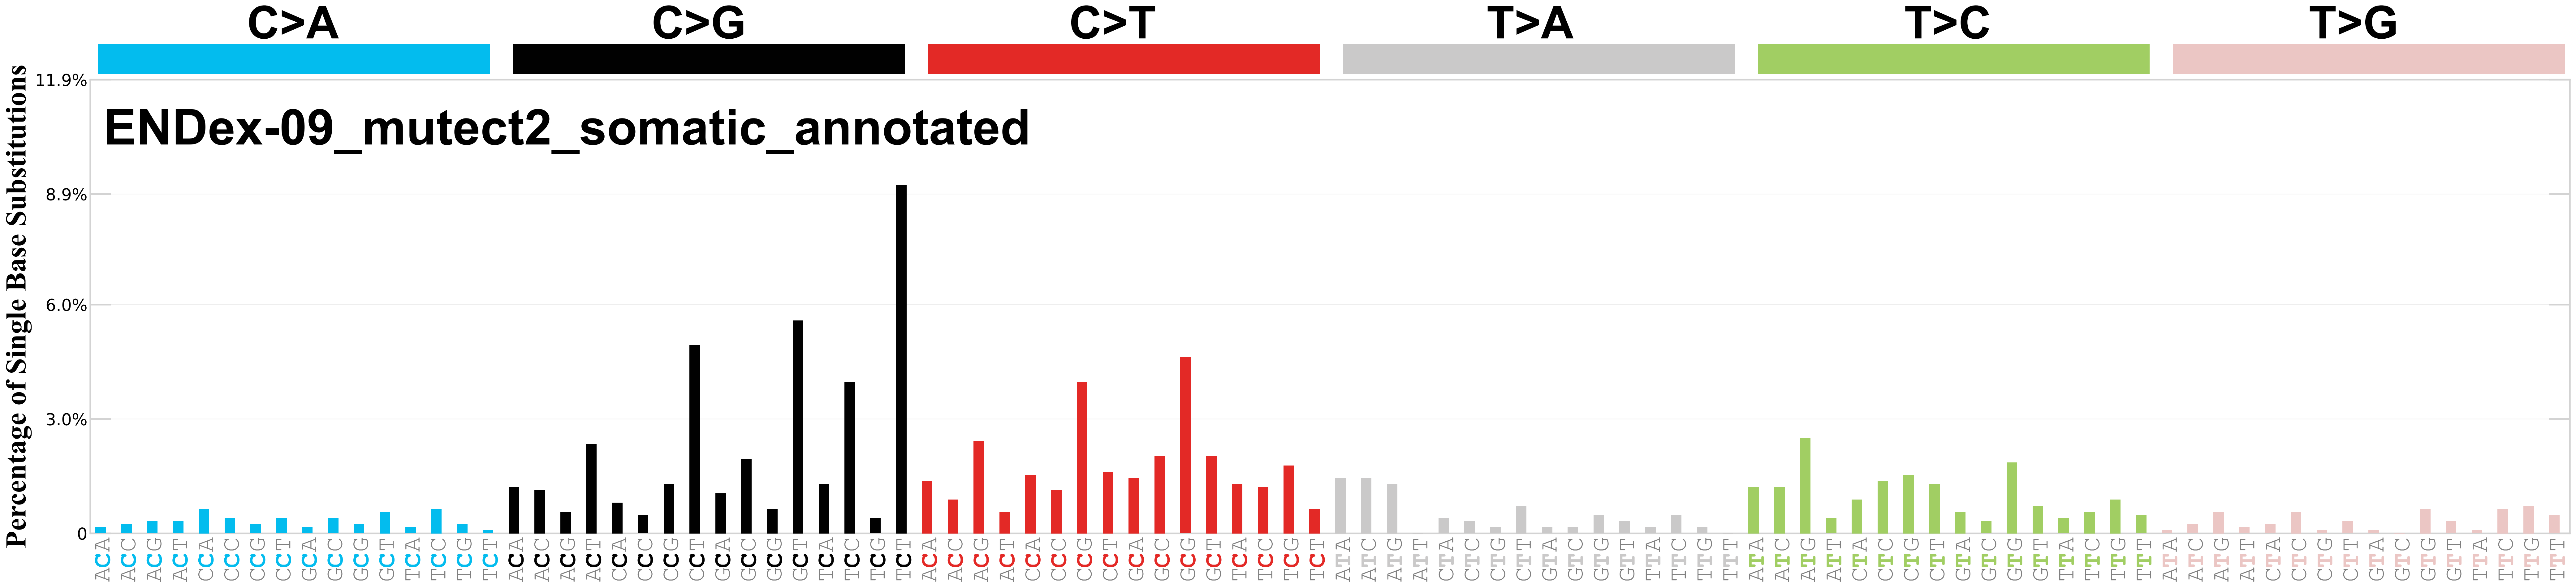

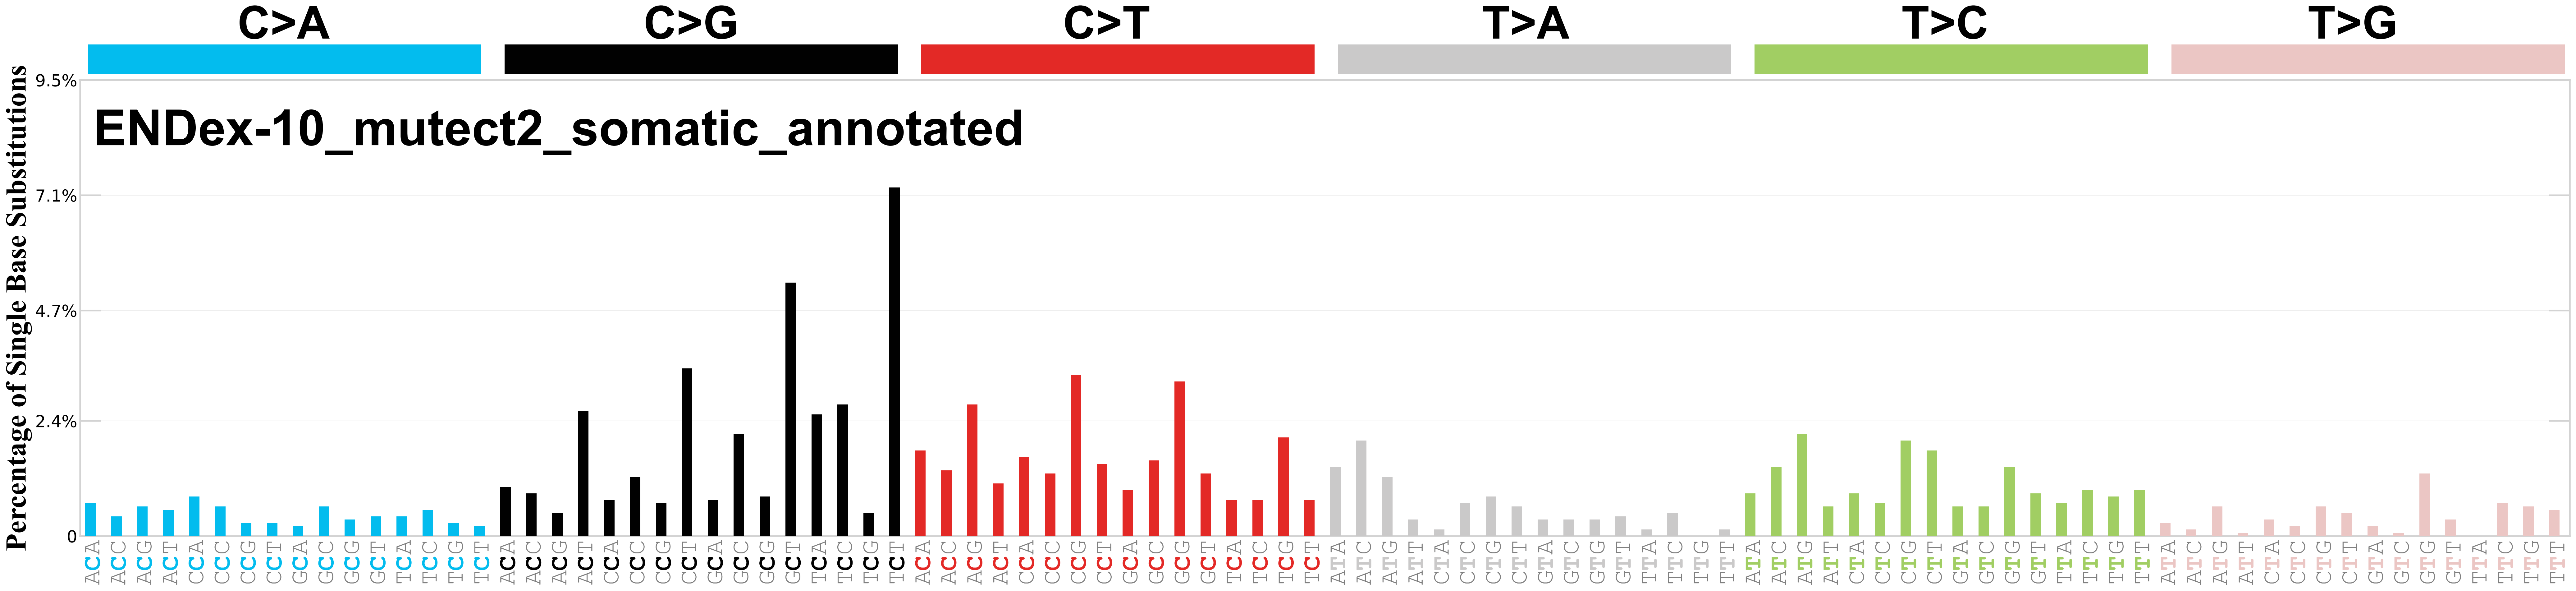

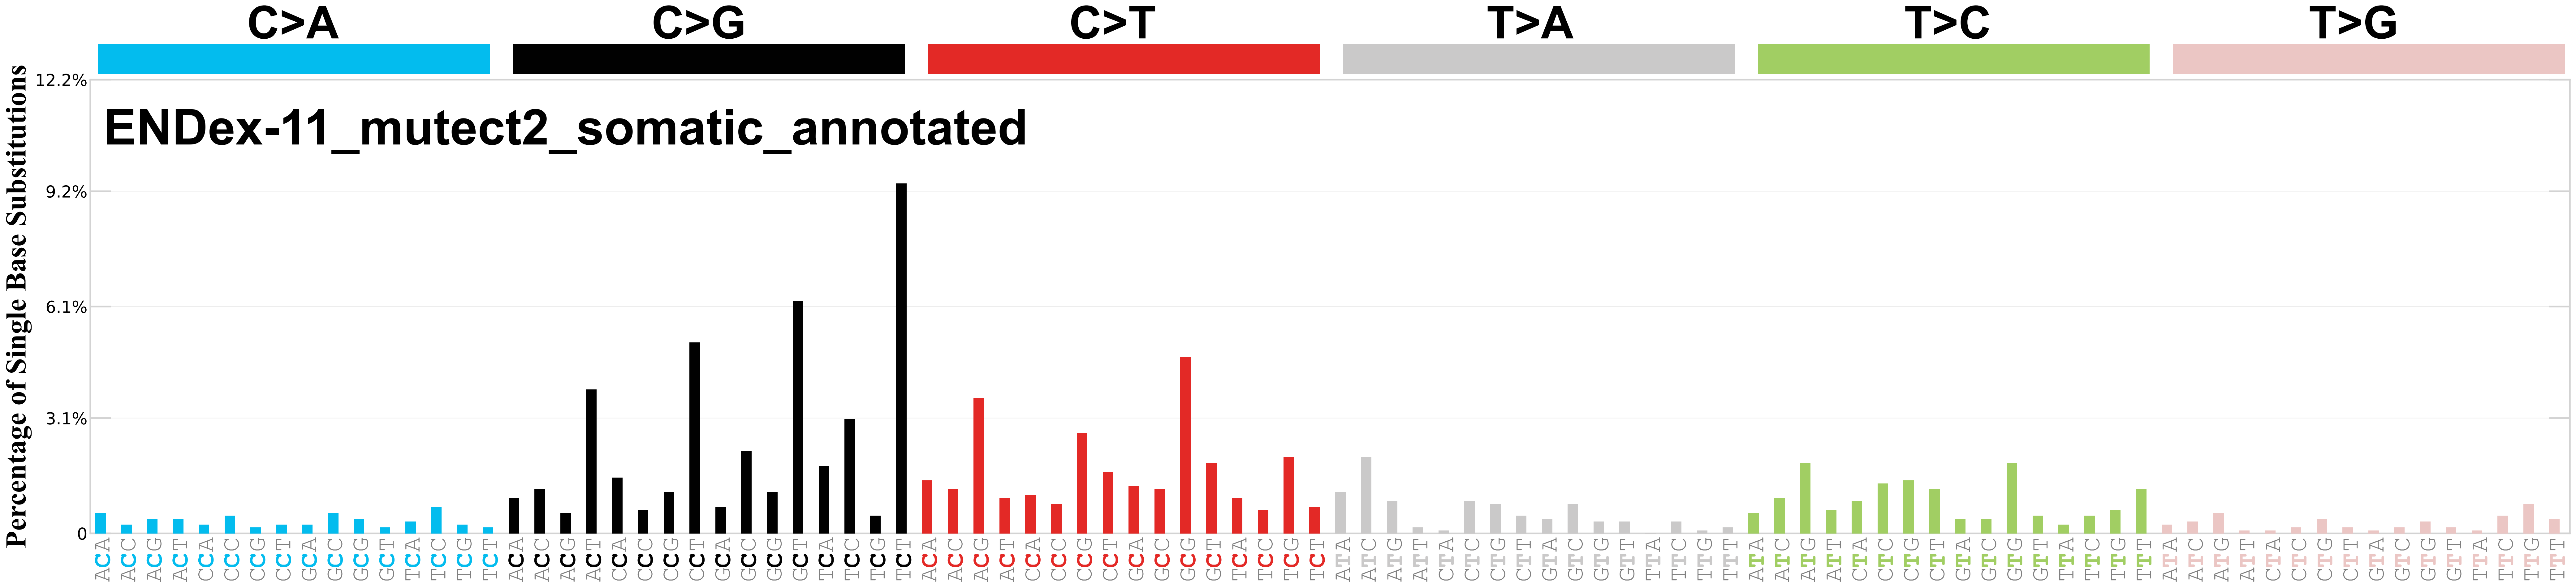

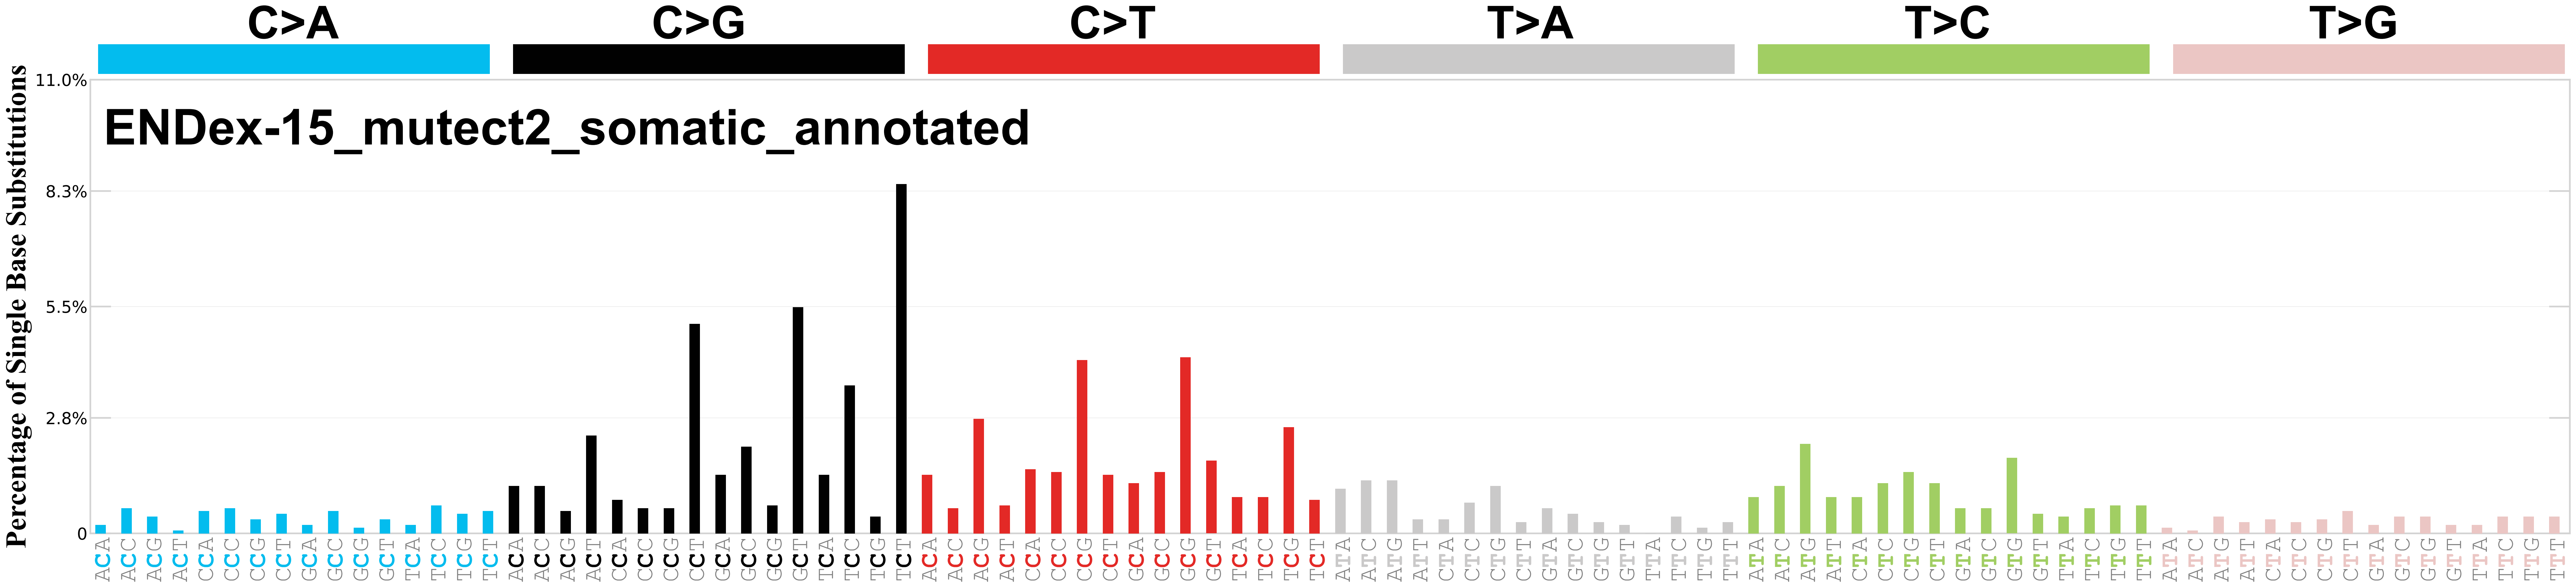

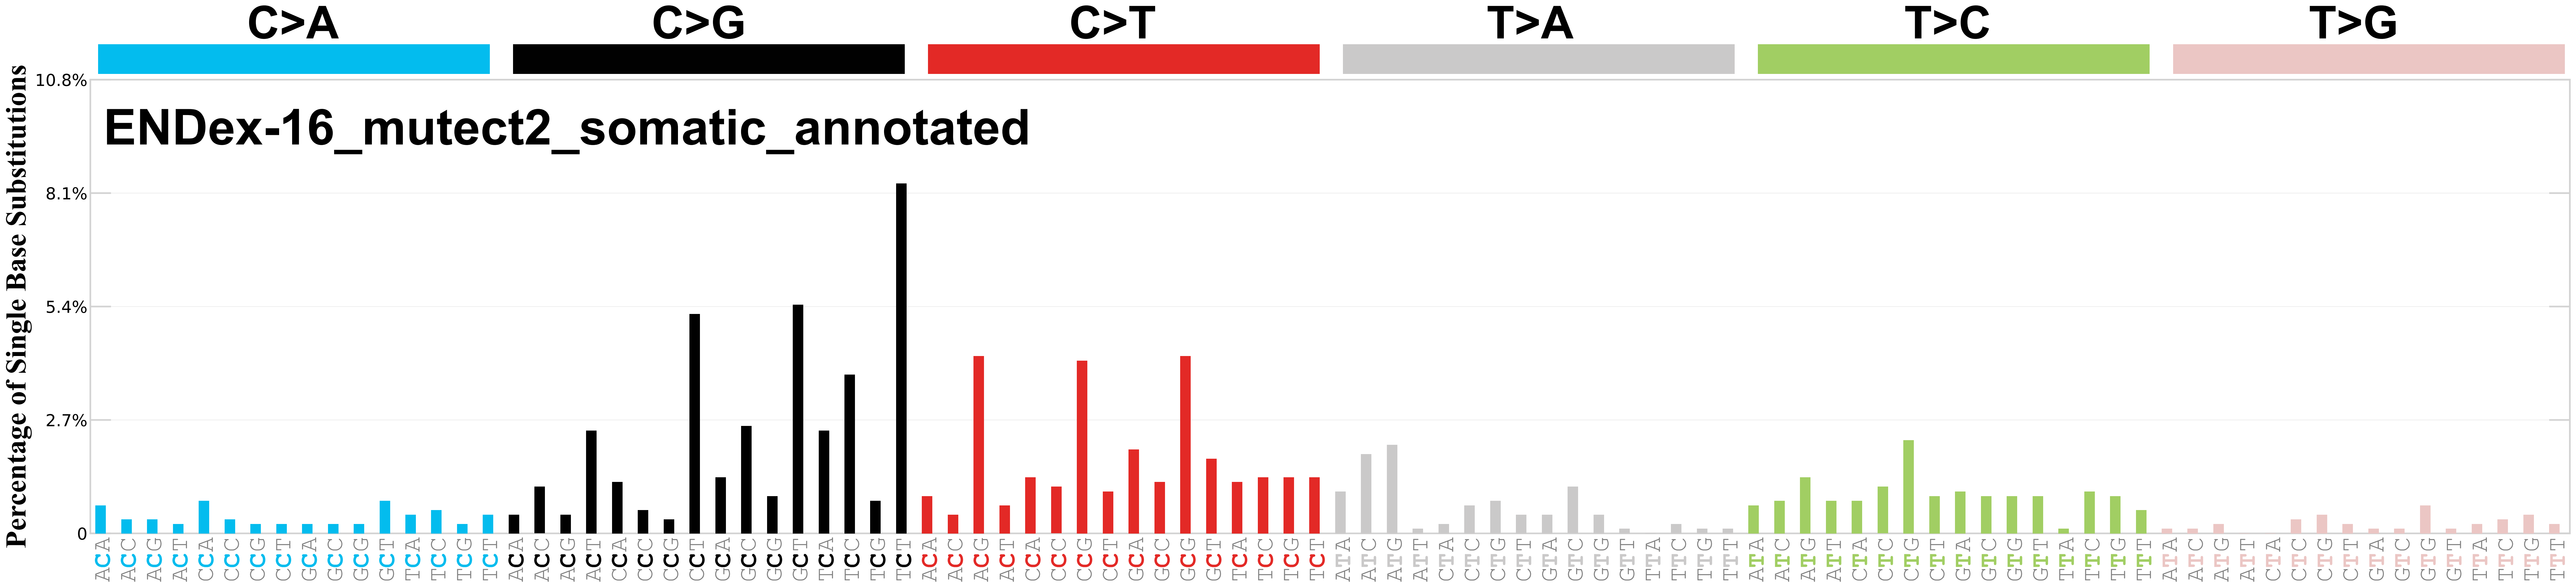



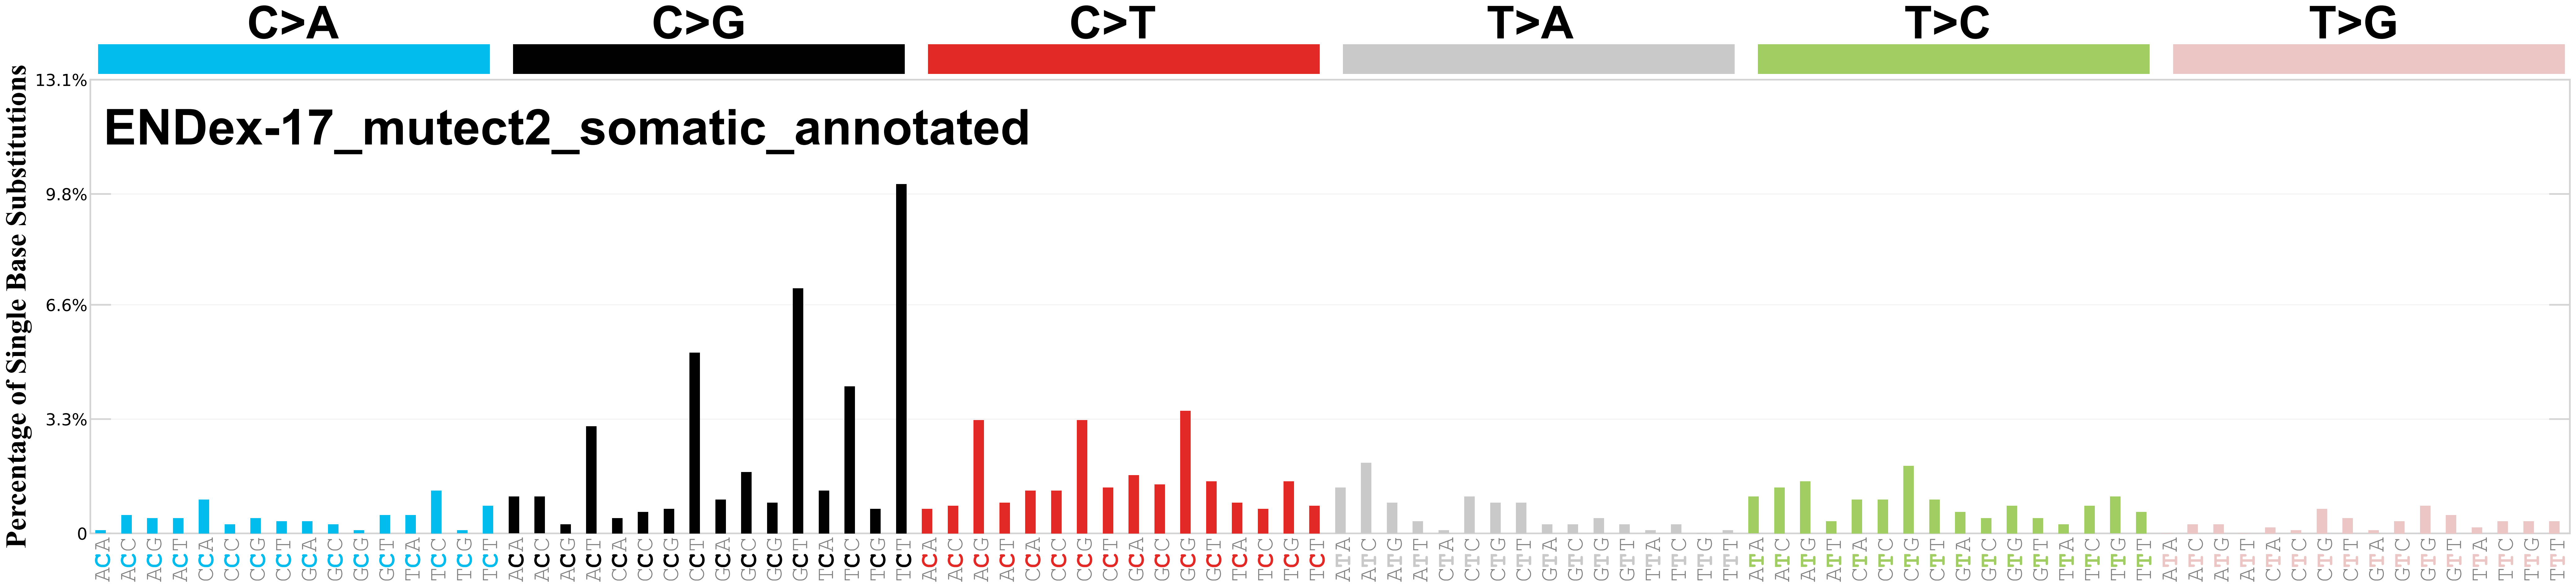

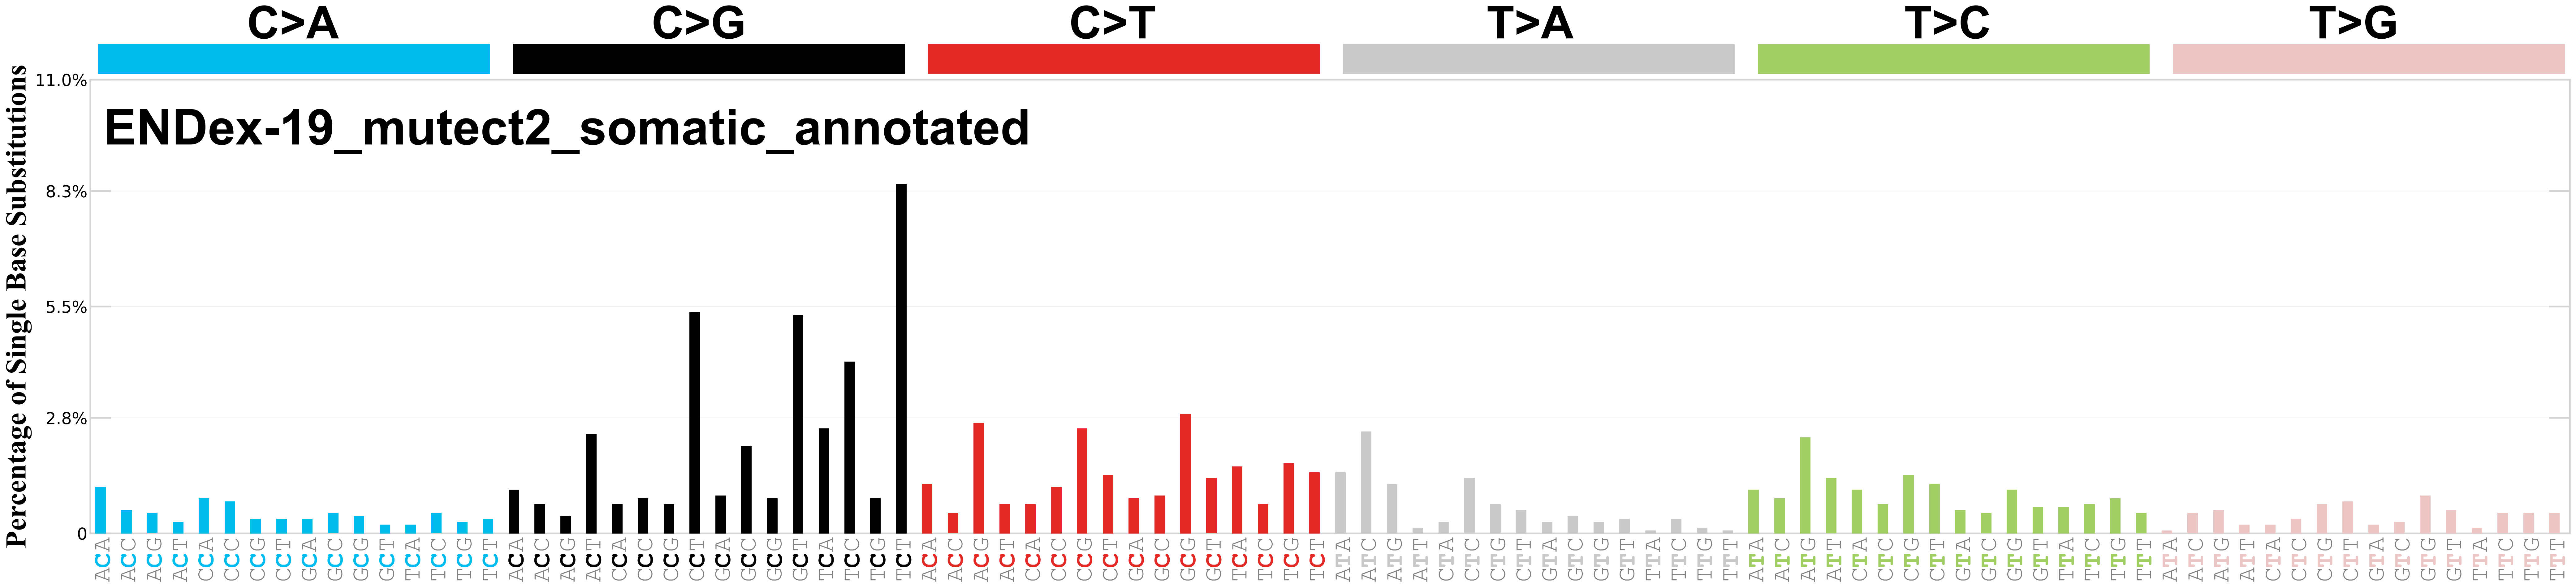

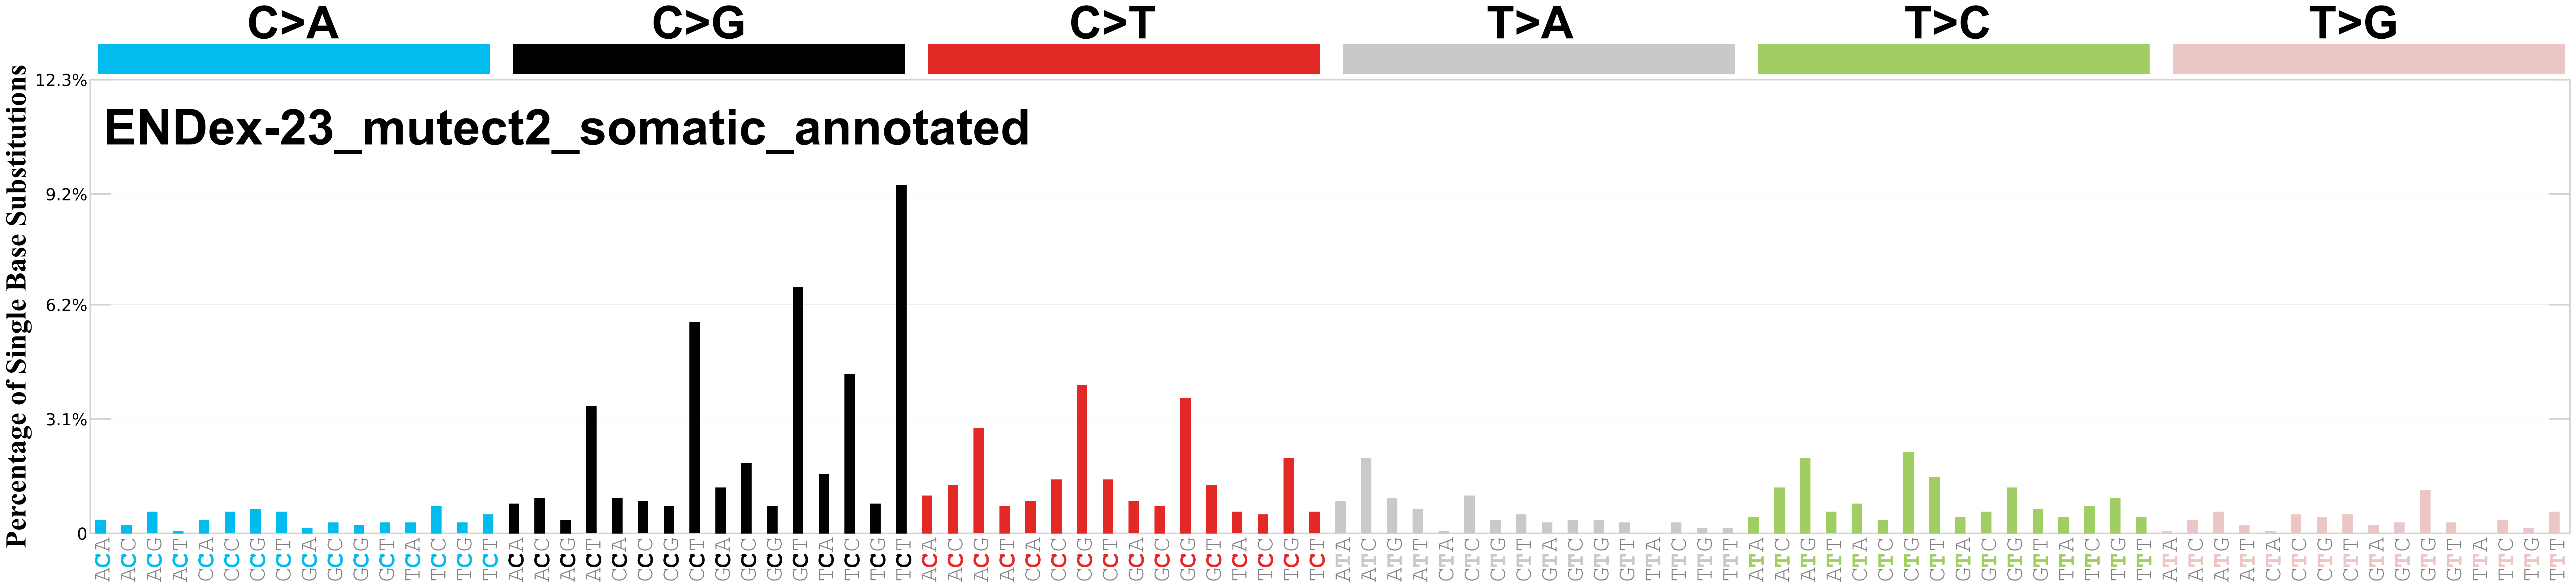

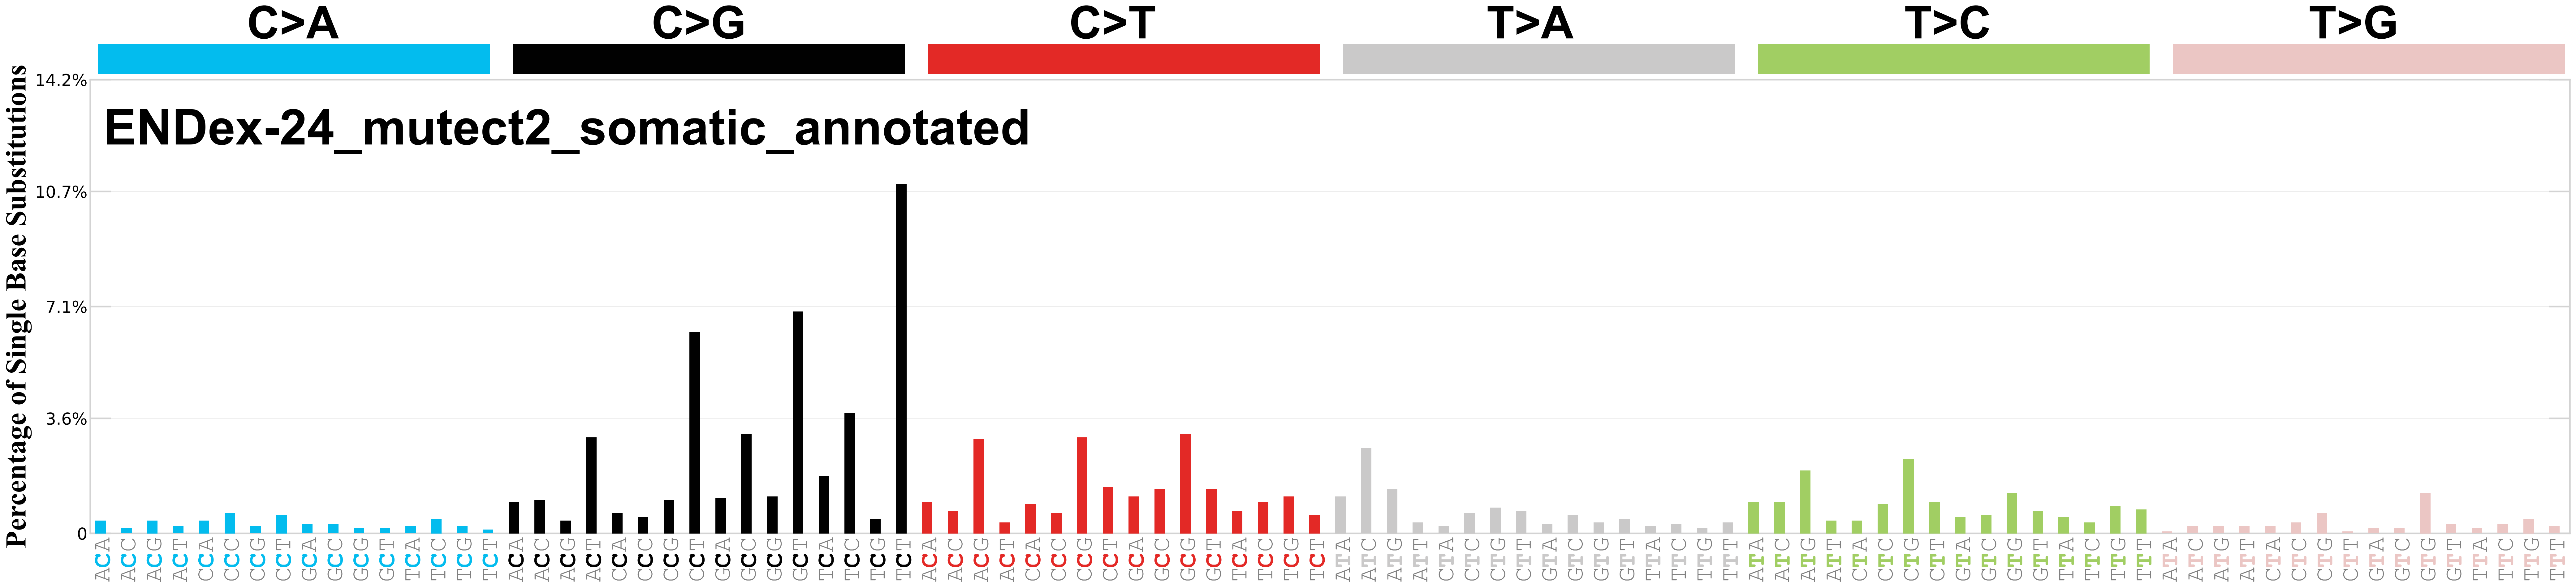

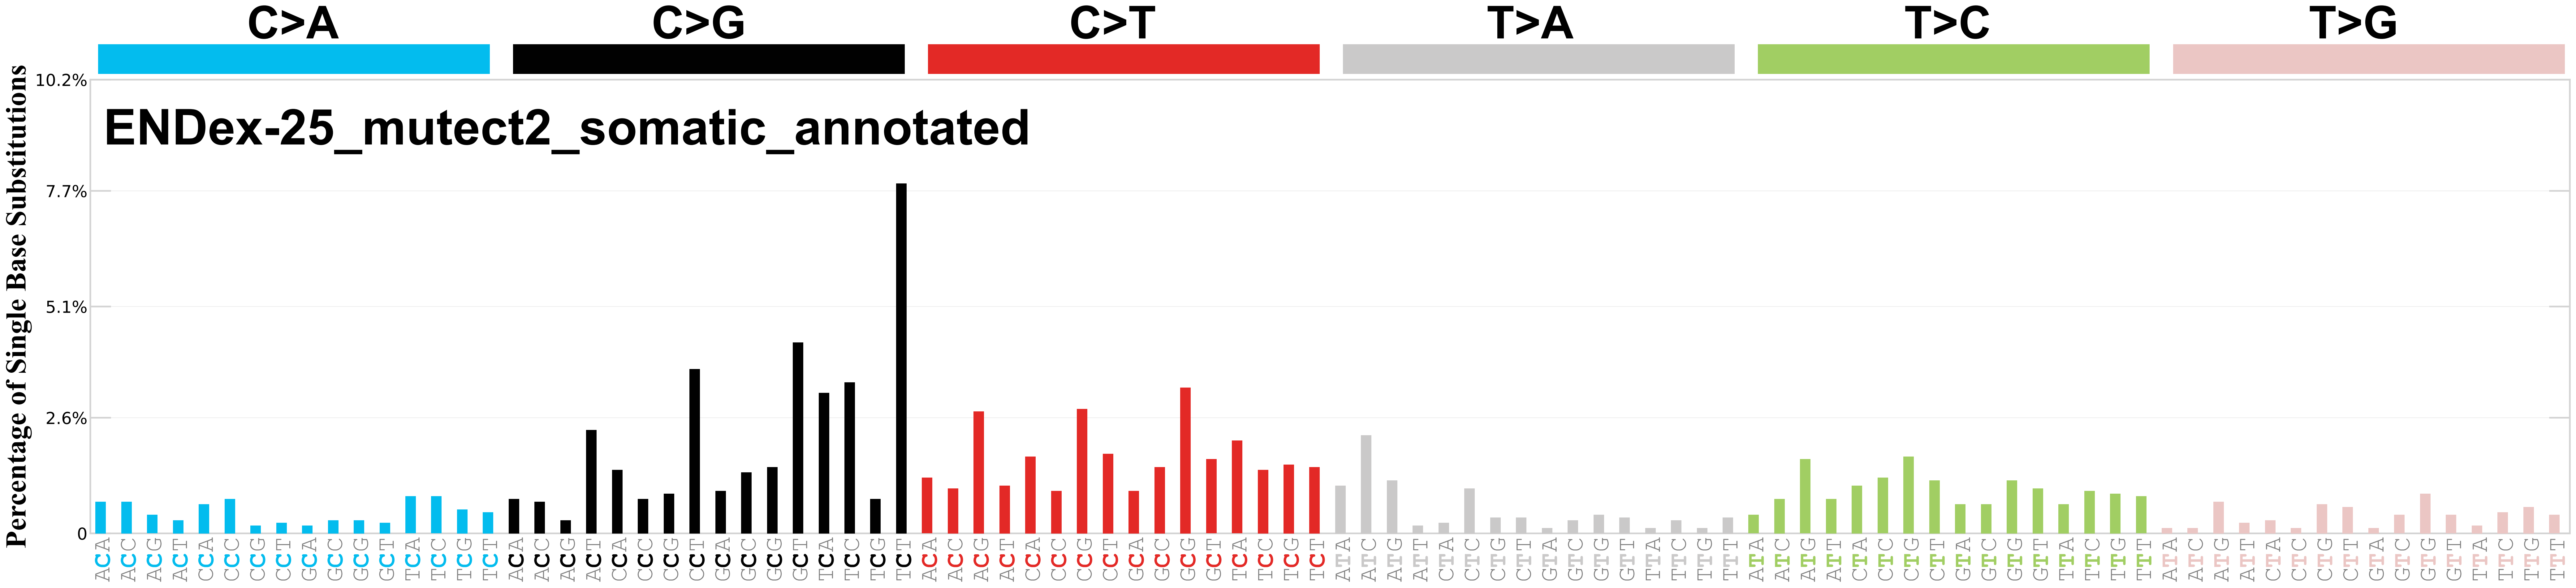

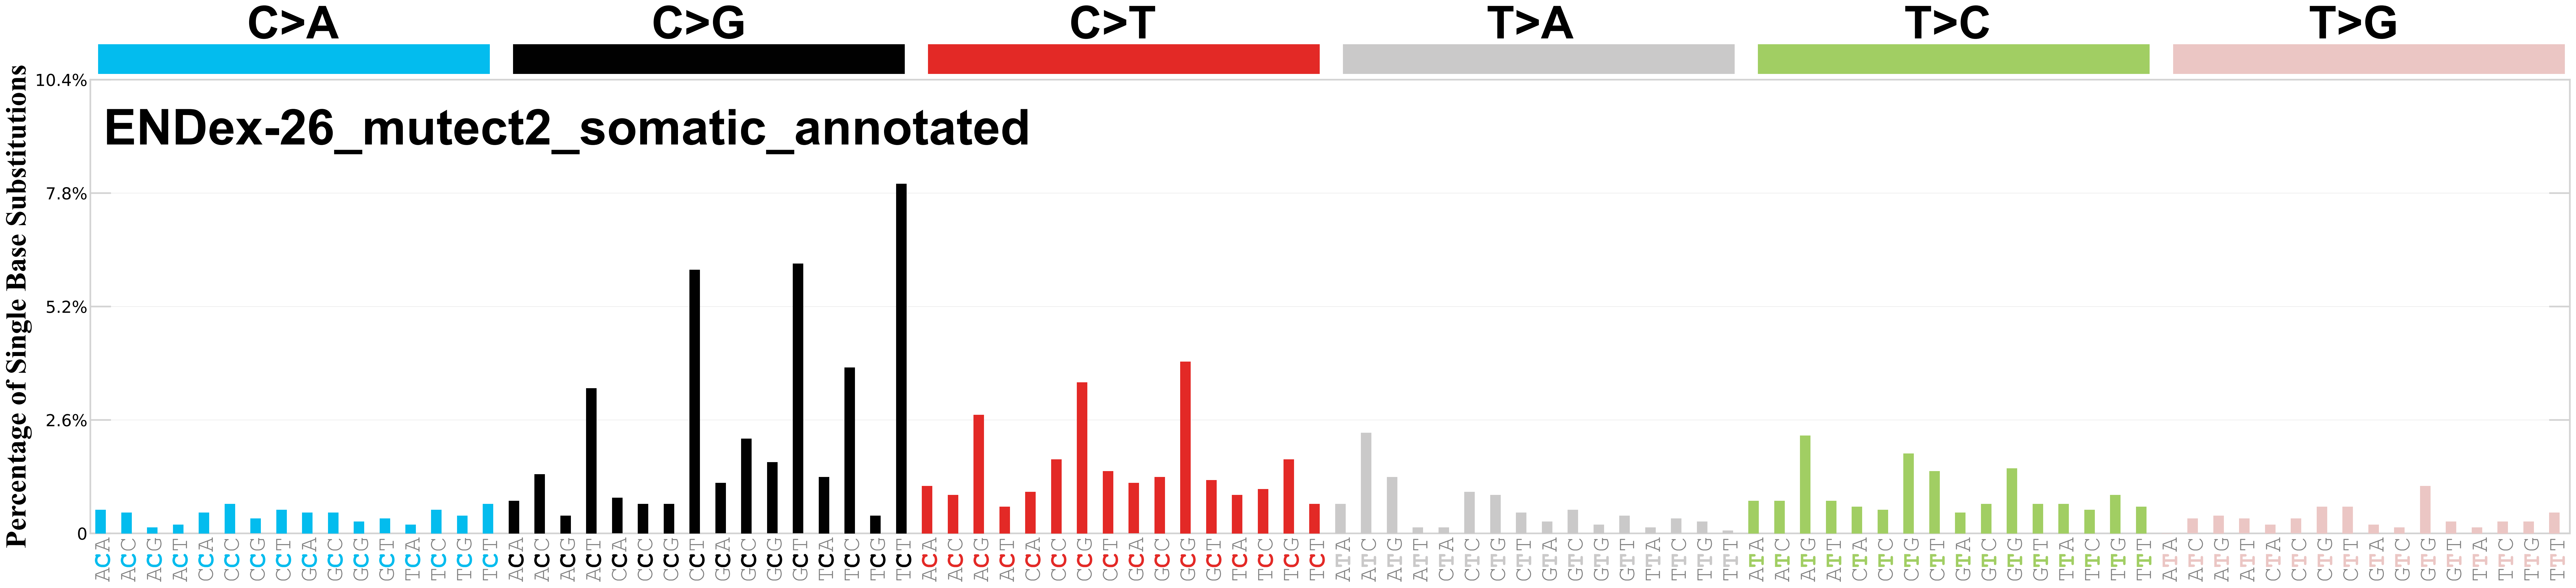

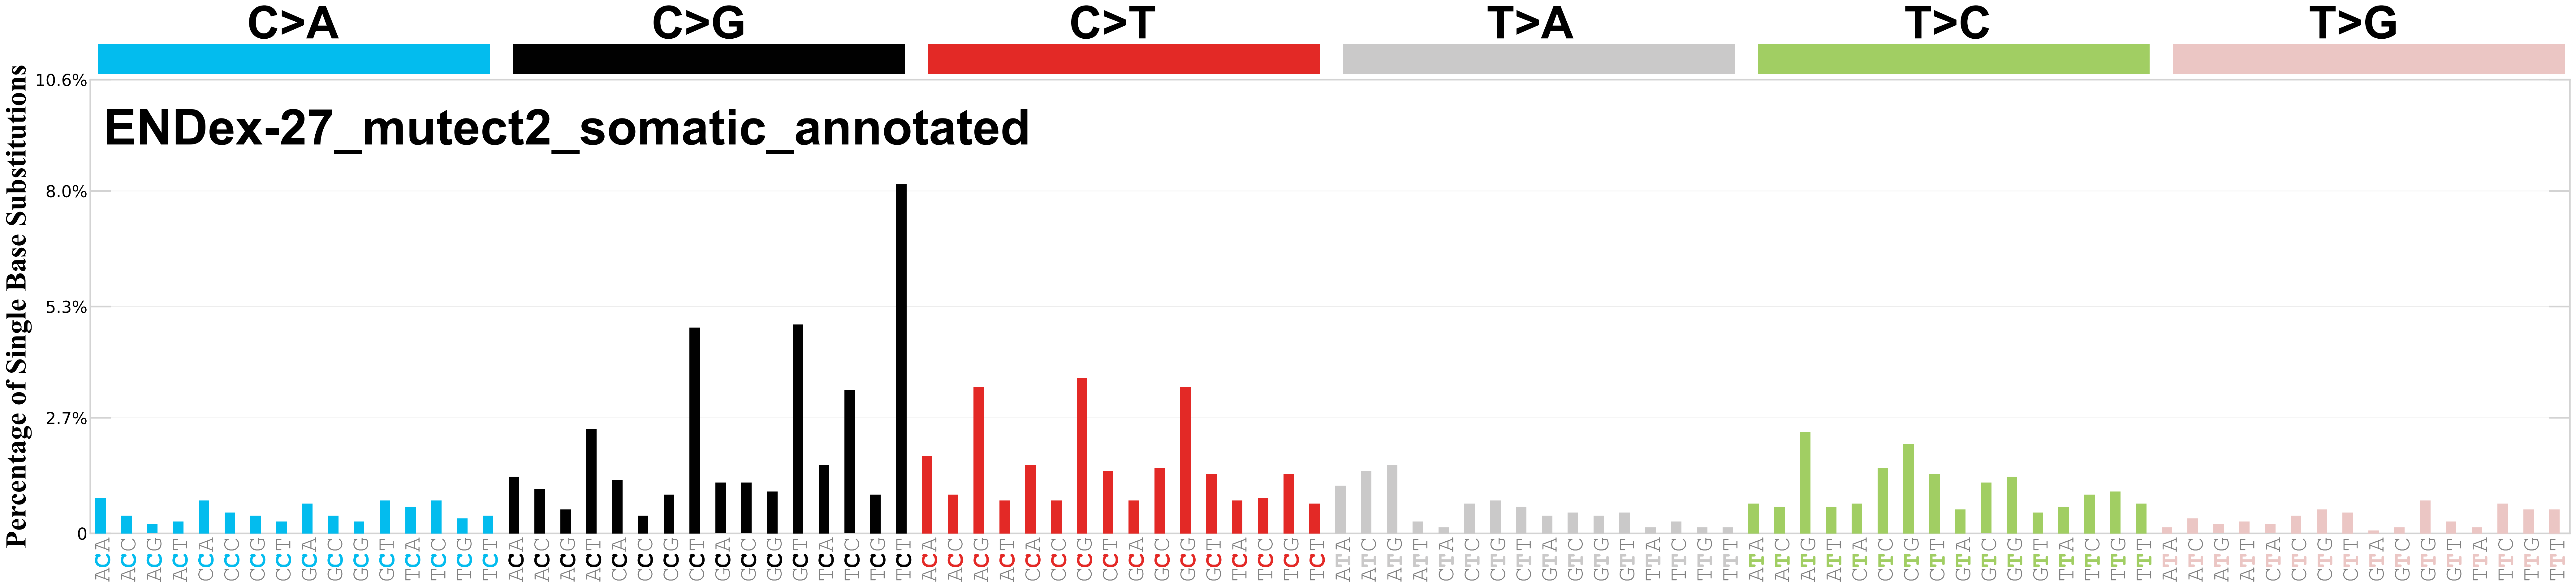

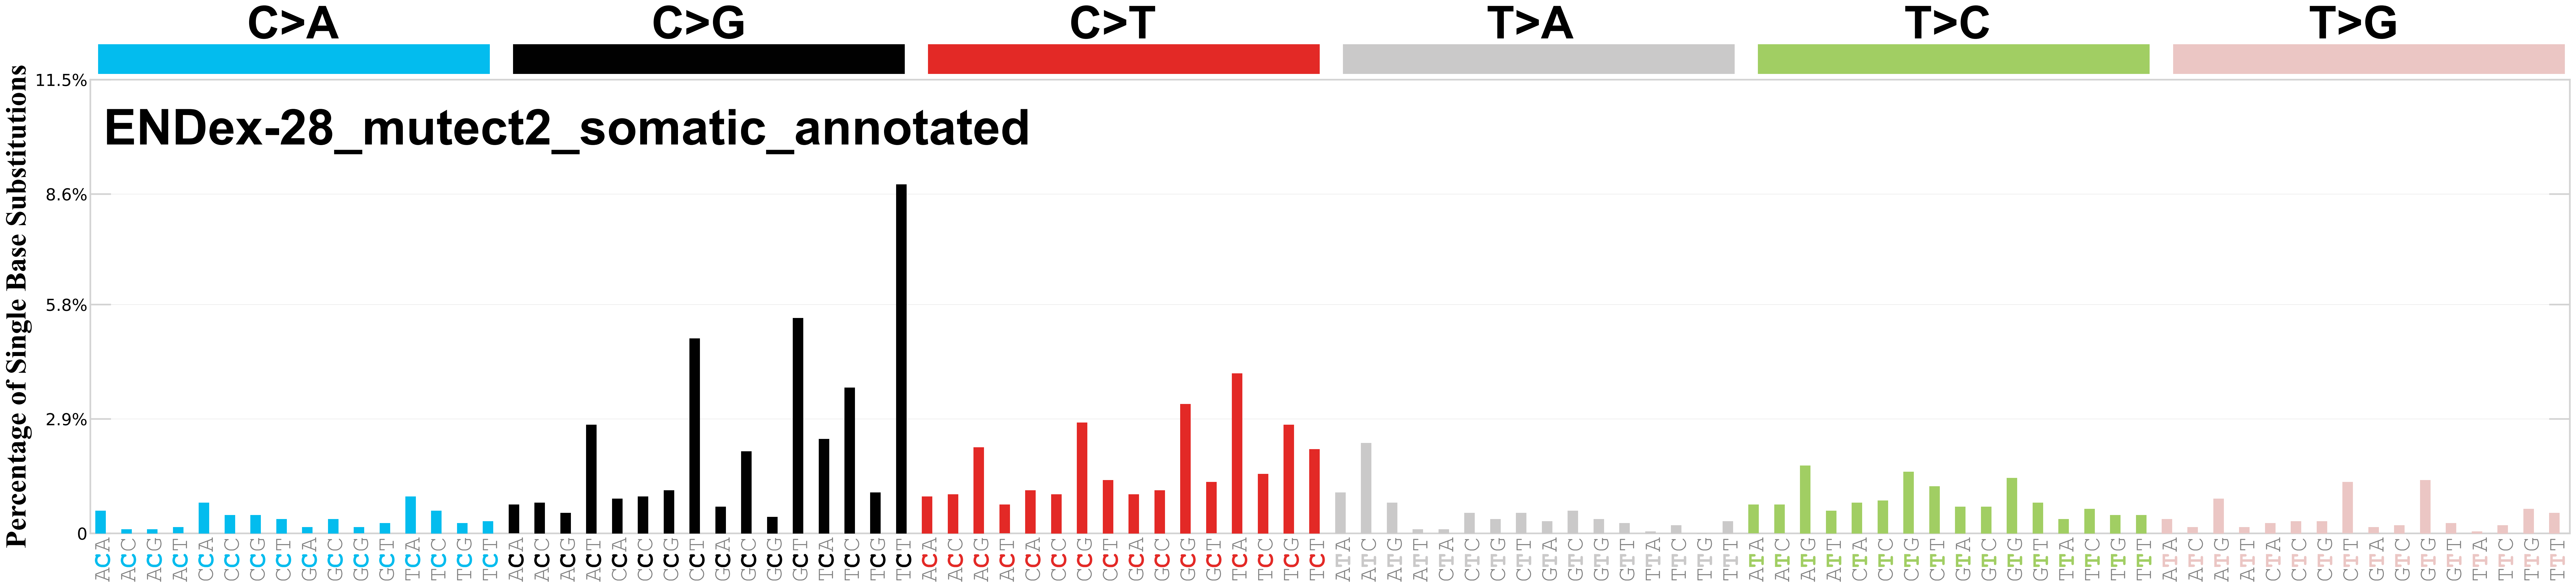



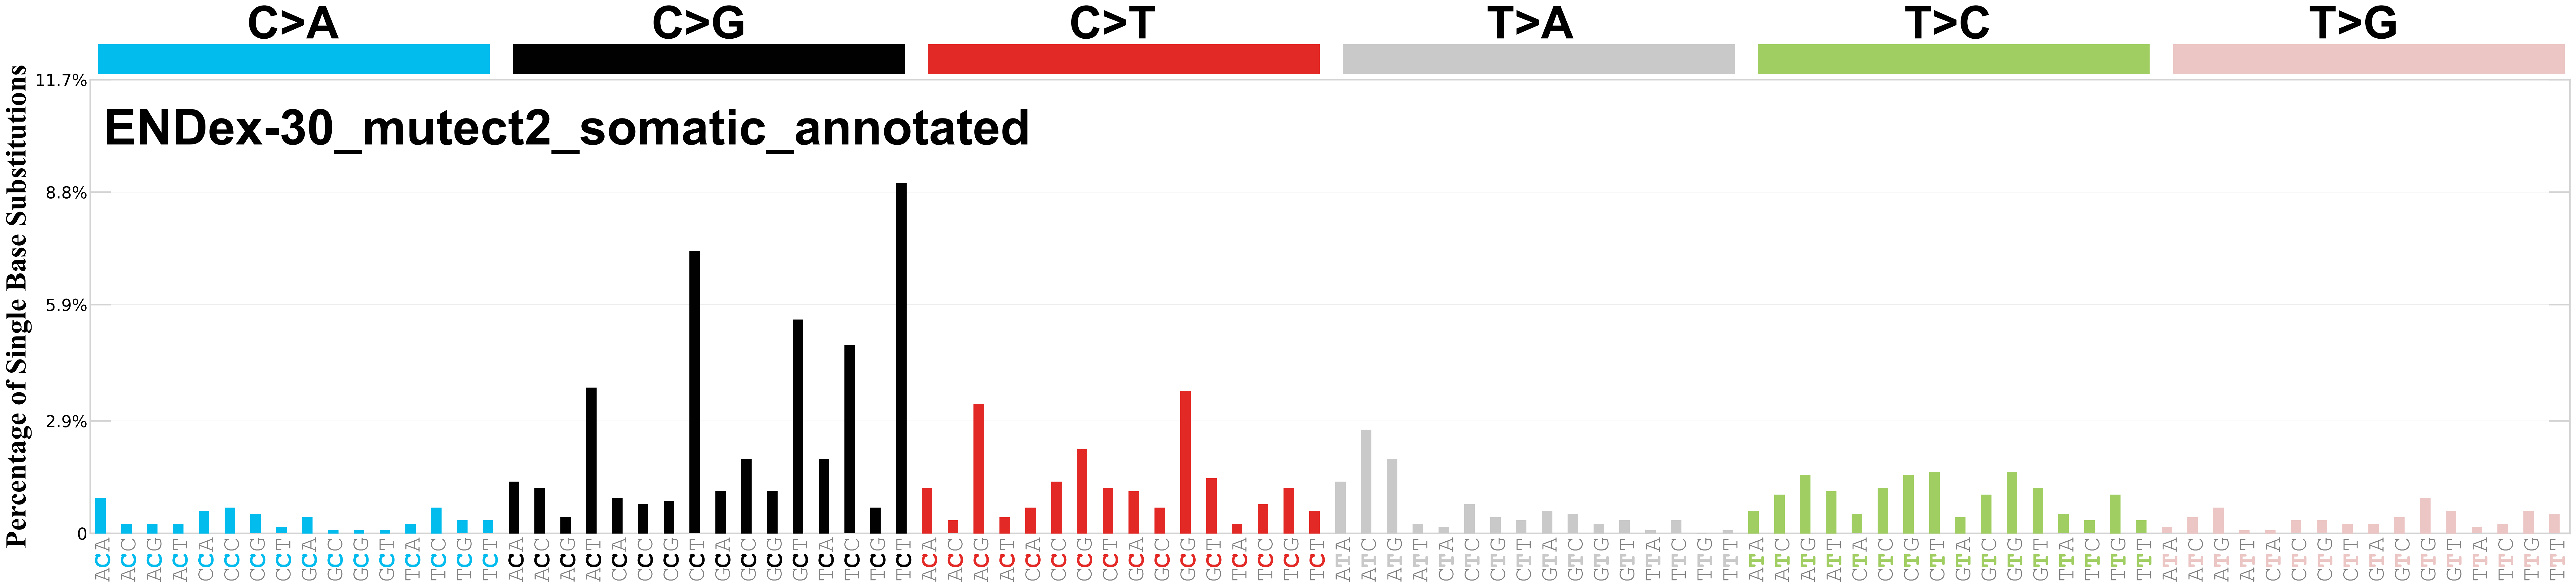

Supplement: 13402_2024_942_MOESM4_ESM.pdf [file 13402_2024_942_MOESM4_ESM.pdf]
